# Supplementary material for: ProHits: integrated software for mass spectrometry–based interaction proteomics
Source: Springer Nature journal article supplement (doi:10.1038/nbt1010-1015), 2010-10-01
Supplement: 41587_2010_BFnbt10101015_MOESM31_ESM.pdf [file 41587_2010_BFnbt10101015_MOESM31_ESM.pdf]

## ProHits: an integrated software platform for mass spectrometry-based interaction proteomics

Guomin Liu, Jianping Zhang, Brett Larsen, Chris Stark, Ashton Breitkreutz, Zhen-Yuan Lin, Bobby-Joe Breitkreutz, Yongmei Ding, Karen Colwill, Adrian Pasculescu, Tony Pawson, Jeffrey L. Wrana, Alexey Nesvizhskii, Brian Raught, Mike Tyers, Anne-Claude Gingras

### Supplementary Figures:

|                                                                                              |         |
|----------------------------------------------------------------------------------------------|---------|
| Sup. Figure 1 – Database Tables .....                                                        | page 2  |
| Sup. Figure 2 – Administration module.....                                                   | page 5  |
| Sup. Figure 3 – ProHits full and Lite versions.....                                          | page 6  |
| Sup. Figure 4 – Data Management module: Details .....                                        | page 7  |
| Sup. Figure 5 – Data Management module: Storage .....                                        | page 8  |
| Sup. Figure 6 – Data Management module: Autosearch flowchart .....                           | page 9  |
| Sup. Figure 7 – Data Management module: Autosearch functions .....                           | page 10 |
| Sup. Figure 8 – Gel-based samples .....                                                      | page 11 |
| Sup. Figure 9 – Creating a new Bait in ProHits Analyst .....                                 | page 12 |
| Sup. Figure 10 – Experimental annotation in the Analyst module .....                         | page 13 |
| Sup. Figure 11 – Links between the Analyst and Data Management modules .....                 | page 14 |
| Sup. Figure 12 – Uploading search results generated outside of ProHits .....                 | page 15 |
| Sup. Figure 13 – Analyst module: Bait and Sample Reports.....                                | page 16 |
| Sup. Figure 14 – Analyst module: Filtering search results .....                              | page 17 |
| Sup. Figure 15 – Analyst module: Selecting Baits or Samples for Comparison .....             | page 18 |
| Sup. Figure 16 – Analyst module: Comparison page .....                                       | page 19 |
| Sup. Figure 17 – Unfiltered data for main text Figure 1b.....                                | page 20 |
| Sup. Figure 18 – Advanced Search functions in the Analyst module .....                       | page 33 |
| Sup. Figure 19 – Exporting Hits associated with selected samples .....                       | page 34 |
| Sup. Figure 20 – Managing Protocols and Lists .....                                          | page 35 |
| Sup. Figure 21 – Preparing interaction reports for submission to interaction databases ..... | page 36 |

### Other Supplementary information (also available at [www.ProHitsMS.com](http://www.ProHitsMS.com)):

|                                         |          |
|-----------------------------------------|----------|
| <b>User manuals</b> .....               | page 37  |
| Introduction .....                      | page 37  |
| MS Data Management.....                 | page 41  |
| Analyst module .....                    | page 58  |
| <b>ProHits installation guide</b> ..... | page 110 |

### Supplementary information only available at [www.ProHitsMS.com](http://www.ProHitsMS.com):

Demo site for navigation purposes

ProHits download package (contains the demo data and source code)

ProHits video tutorials

ProHits user manuals

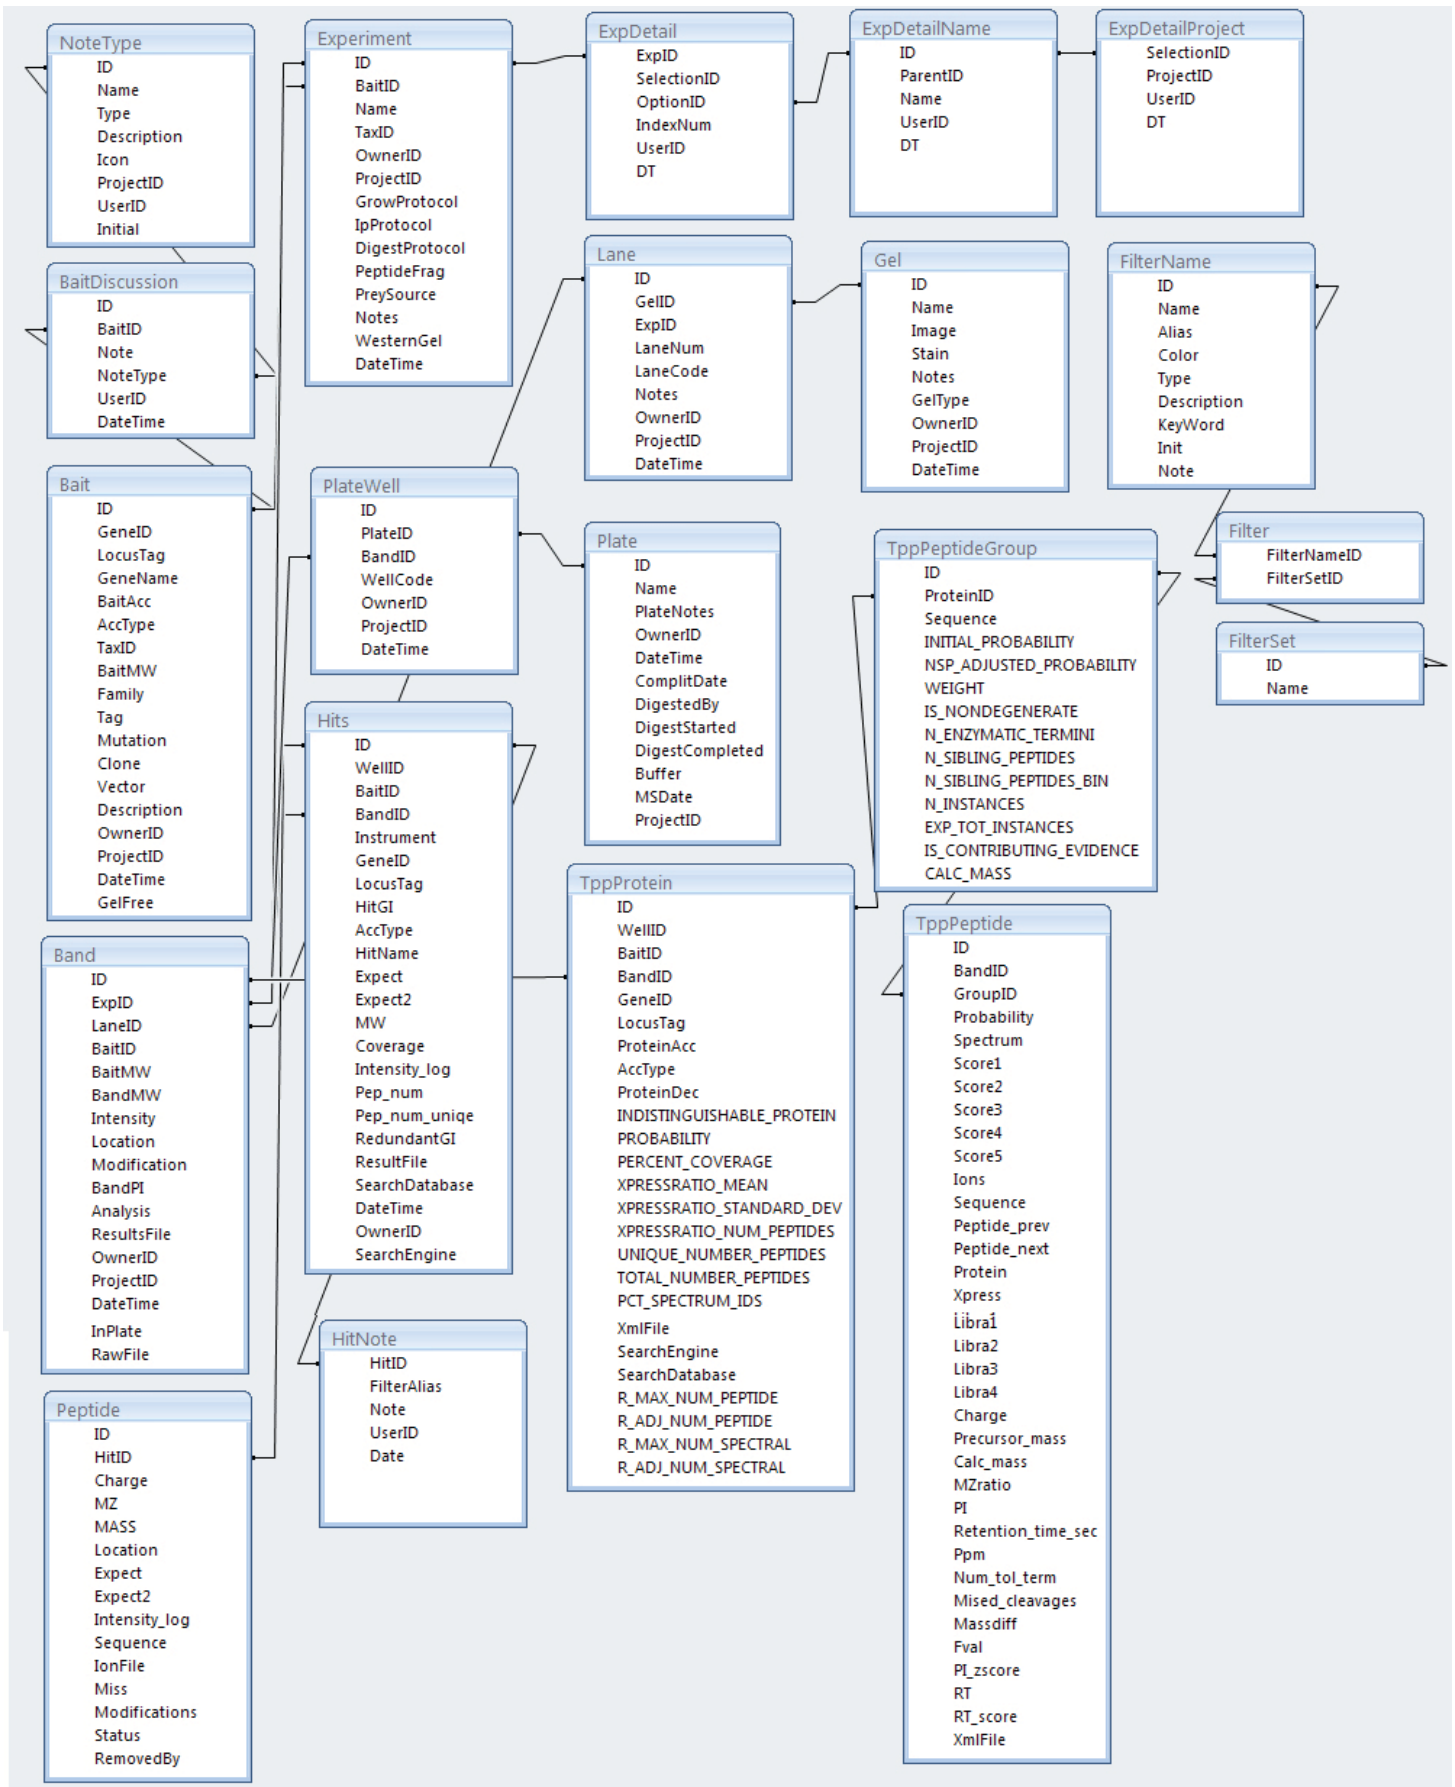

**Supplementary Figure 1. Database Tables.** A) Analyst module.

B

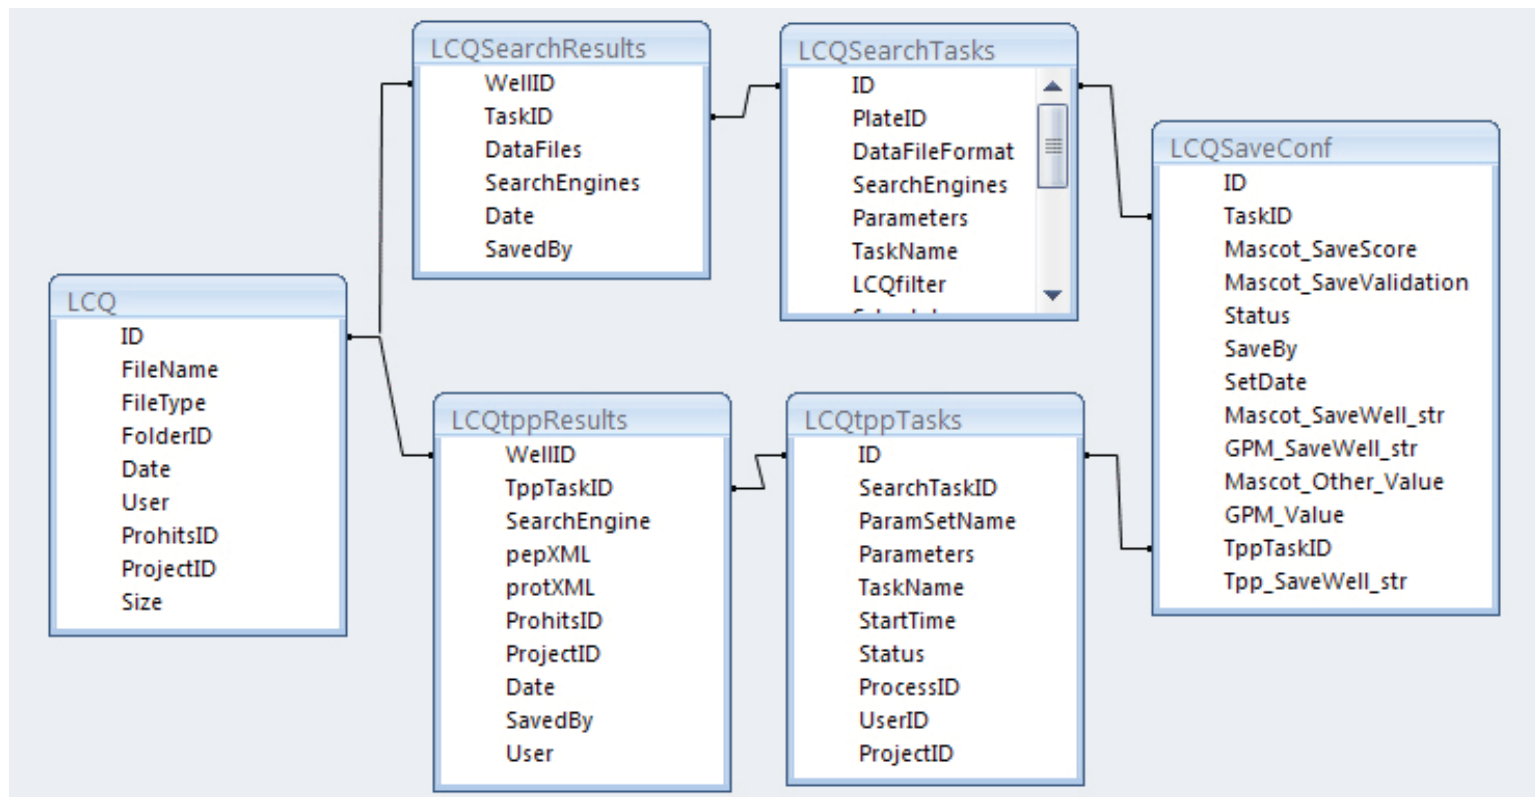

**Supplementary Figure 1. Database Tables.** B) Data Management module.

C

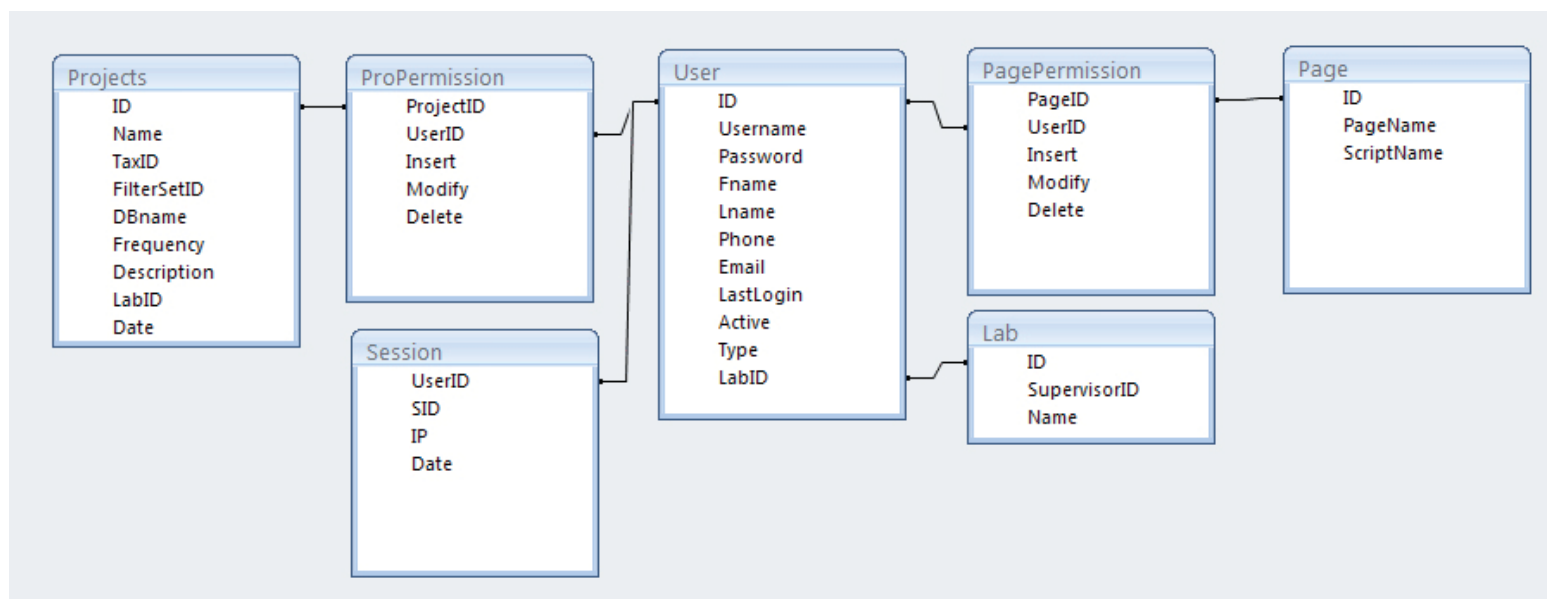

**Supplementary Figure 1. Database Tables.** C) Administration module.

A

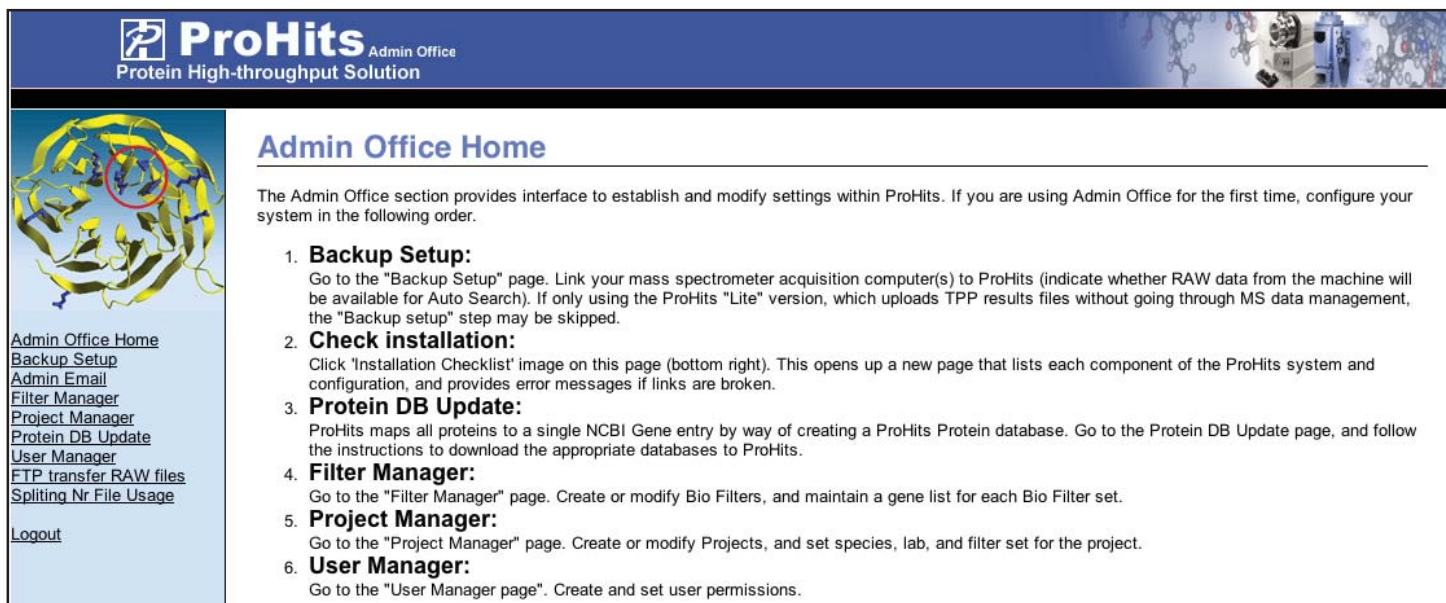

**ProHits** Admin Office  
Protein High-throughput Solution

## Admin Office Home

The Admin Office section provides interface to establish and modify settings within ProHits. If you are using Admin Office for the first time, configure your system in the following order.

- Backup Setup:**  
Go to the "Backup Setup" page. Link your mass spectrometer acquisition computer(s) to ProHits (indicate whether RAW data from the machine will be available for Auto Search). If only using the ProHits "Lite" version, which uploads TPP results files without going through MS data management, the "Backup setup" step may be skipped.
- Check installation:**  
Click 'Installation Checklist' image on this page (bottom right). This opens up a new page that lists each component of the ProHits system and configuration, and provides error messages if links are broken.
- Protein DB Update:**  
ProHits maps all proteins to a single NCBI Gene entry by way of creating a ProHits Protein database. Go to the Protein DB Update page, and follow the instructions to download the appropriate databases to ProHits.
- Filter Manager:**  
Go to the "Filter Manager" page. Create or modify Bio Filters, and maintain a gene list for each Bio Filter set.
- Project Manager:**  
Go to the "Project Manager" page. Create or modify Projects, and set species, lab, and filter set for the project.
- User Manager:**  
Go to the "User Manager" page". Create and set user permissions.

[Admin Office Home](#)  
[Backup Setup](#)  
[Admin Email](#)  
[Filter Manager](#)  
[Project Manager](#)  
[Protein DB Update](#)  
[User Manager](#)  
[FTP transfer RAW files](#)  
[Splitting Nr File Usage](#)  
[Logout](#)

B

**Projects** [\[Add New\]](#) [\[Project List\]](#)

**New Project**

Project ID: \_\_\_\_\_

Project Name:

Species:

Filter Set:  [\[New Filter Set\]](#)

Hits DB Name:

Frequency:  %

Description:

Lab Name:  [\[Add Lab\]](#)

Date:  now

D

**Add a new user**

User ID.: \_\_\_\_\_

User Name:

Password:

Password(re-type):

First Name:

Last Name:

Contact Phone #:

Contact E-mail:

User Type:

Lab Name:  [\[Add Lab\]](#)

Last On: \_\_\_\_\_

**Project Permissions** [\[new project\]](#)

|                         |                                 |                                 |                                 |                                 |
|-------------------------|---------------------------------|---------------------------------|---------------------------------|---------------------------------|
| Demo Yeast Gel (1)      | <input type="checkbox"/> Access | <input type="checkbox"/> Insert | <input type="checkbox"/> Modify | <input type="checkbox"/> Delete |
| Demo Yeast Gel Free (2) | <input type="checkbox"/> Access | <input type="checkbox"/> Insert | <input type="checkbox"/> Modify | <input type="checkbox"/> Delete |
| Demo Human Gel Free (3) | <input type="checkbox"/> Access | <input type="checkbox"/> Insert | <input type="checkbox"/> Modify | <input type="checkbox"/> Delete |

**Page Permissions**

|                          |                                 |                                 |                                 |                                 |
|--------------------------|---------------------------------|---------------------------------|---------------------------------|---------------------------------|
| User manager             | <input type="checkbox"/> Access | <input type="checkbox"/> Insert | <input type="checkbox"/> Modify | <input type="checkbox"/> Delete |
| Admin office             | <input type="checkbox"/> Access | <input type="checkbox"/> Insert | <input type="checkbox"/> Modify | <input type="checkbox"/> Delete |
| Project manager          | <input type="checkbox"/> Access | <input type="checkbox"/> Insert | <input type="checkbox"/> Modify | <input type="checkbox"/> Delete |
| Filter manager           | <input type="checkbox"/> Access | <input type="checkbox"/> Insert | <input type="checkbox"/> Modify | <input type="checkbox"/> Delete |
| Protein DB Configuration | <input type="checkbox"/> Access | <input type="checkbox"/> Insert | <input type="checkbox"/> Modify | <input type="checkbox"/> Delete |
| Bio-filter editor(bait)  | <input type="checkbox"/> Access | <input type="checkbox"/> Insert | <input type="checkbox"/> Modify | <input type="checkbox"/> Delete |
| Auto Search              | <input type="checkbox"/> Access | <input type="checkbox"/> Insert | <input type="checkbox"/> Modify | <input type="checkbox"/> Delete |
| Auto Save                | <input type="checkbox"/> Access | <input type="checkbox"/> Insert | <input type="checkbox"/> Modify | <input type="checkbox"/> Delete |
| Email                    | <input type="checkbox"/> Access | <input type="checkbox"/> Insert | <input type="checkbox"/> Modify | <input type="checkbox"/> Delete |
| Create Bio Filters       | <input type="checkbox"/> Access | <input type="checkbox"/> Insert | <input type="checkbox"/> Modify | <input type="checkbox"/> Delete |
| Backup Setup             | <input type="checkbox"/> Access | <input type="checkbox"/> Insert | <input type="checkbox"/> Modify | <input type="checkbox"/> Delete |
| Text-based Protocols     | <input type="checkbox"/> Access | <input type="checkbox"/> Insert | <input type="checkbox"/> Modify | <input type="checkbox"/> Delete |
| Experimental Editor      | <input type="checkbox"/> Access | <input type="checkbox"/> Insert | <input type="checkbox"/> Modify | <input type="checkbox"/> Delete |
| Group Lists              | <input type="checkbox"/> Access | <input type="checkbox"/> Insert | <input type="checkbox"/> Modify | <input type="checkbox"/> Delete |
| Bait Epitope Tag         | <input type="checkbox"/> Access | <input type="checkbox"/> Insert | <input type="checkbox"/> Modify | <input type="checkbox"/> Delete |
| Background Lists         | <input type="checkbox"/> Access | <input type="checkbox"/> Insert | <input type="checkbox"/> Modify | <input type="checkbox"/> Delete |

C

**Experiment Filters**

Score < 0  Expect > 1  Coverage < \_\_\_\_\_ %

Peptide \_\_\_\_\_ < \_\_\_\_\_  Frequency > 3 \_\_\_\_\_ %

background list  Carry Over  Spill Over  Auto-MW Exclusion

**Bio Filters**

Ribosomal  Cytoskeleton  Bait  Keratin

Artifact Protein  Translation Elongation Factor  DEAD/H Box  Albumin

**BioGRID overlap**

Physical HTP  Physical NON-HTP  Genetic HTP  Genetic NON-HTP

**Supplementary Figure 2. Administration module.** A) Home page of the Admin Office, detailing available options. B) Creation of a new project in Project Manager. Projects are associated with a specific research laboratory or working group, and generally contains results from a single species to which filter sets may be applied. "Frequency" refers here to the desired threshold for flagging a given hit as a likely contaminant based on detection across multiple purifications within the same project. C) Filters applicable to a specific project ("Report" page from the Analyst module). Filters may be "experimental", and related to quantitative information from the mass spectrometry results; these are not controlled in the Admin office. "Bio Filters" are defined in the "Filter Manager" of the Admin Office via text mining of the ProHits protein DB. D) User manager page. Each user is assigned access and modification privileges for specific projects.

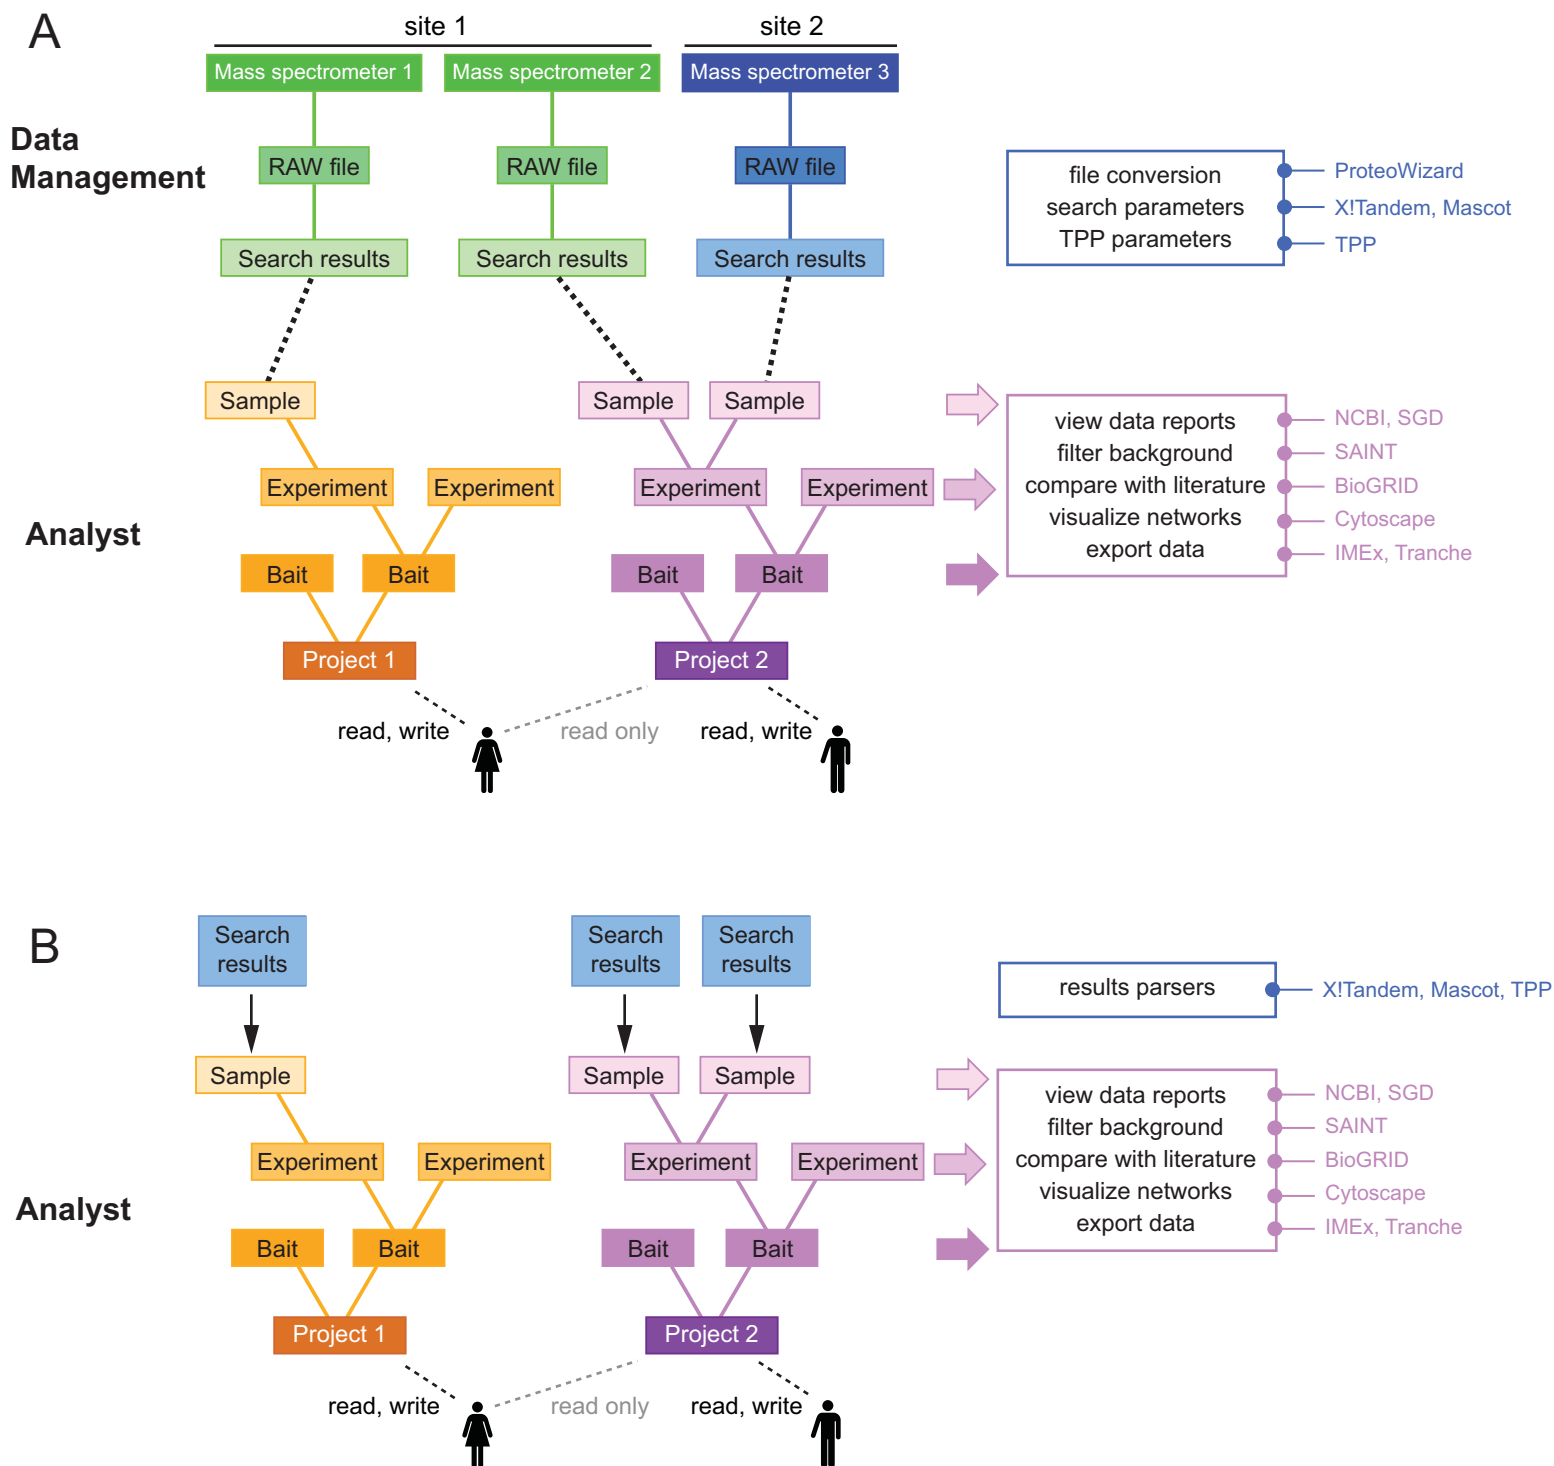

**Supplementary Figure 3. Complete and Lite versions of ProHits.** A) Complete version with the Data Management module: in addition to the ProHits server, specific servers for search engines and data conversion are mounted. The acquisition computers for each of the MS instruments are also linked to the ProHits server in the Data Management module. B) The ProHits lite version essentially consists of the Analyst module. Search results (obtained externally) are directly uploaded to a sample. Currently, uploads of search results from Mascot, X!Tandem and the TransProteomics pipeline are supported. ProHits Lite only requires setting up the ProHits server.

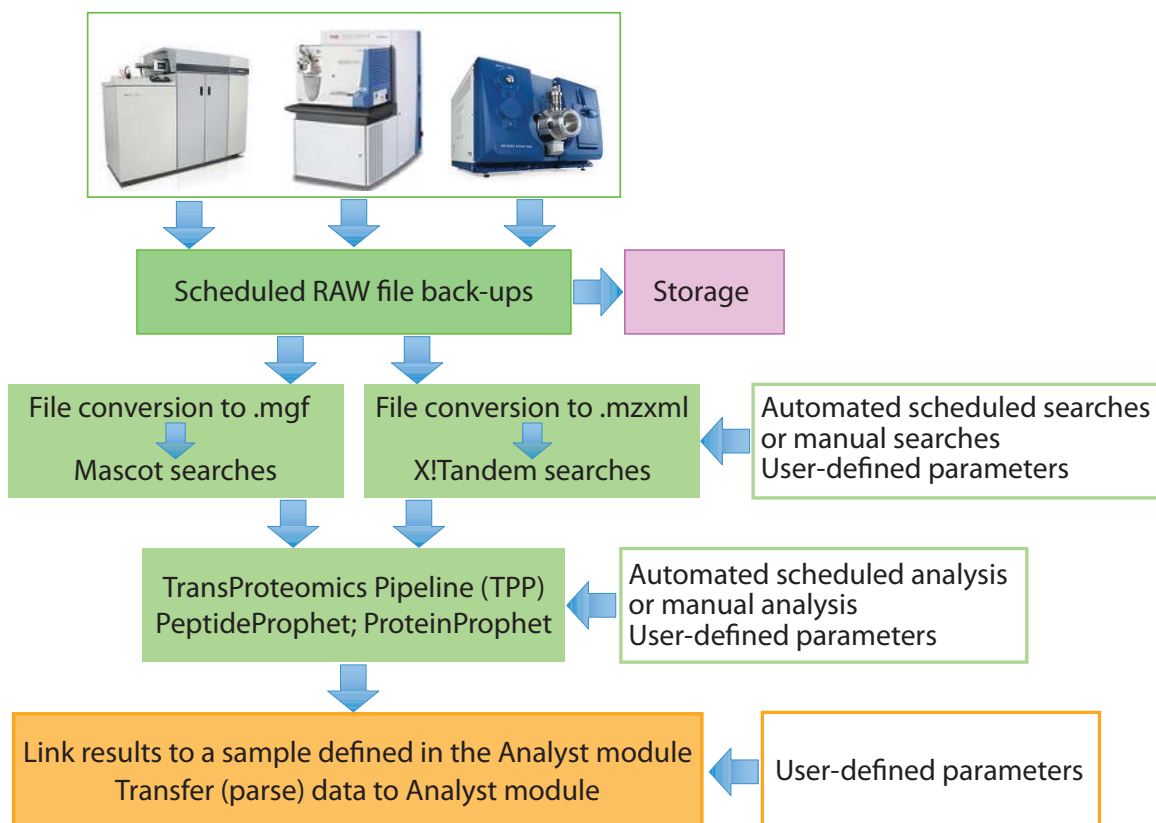

**Supplementary Figure 4. Data Management module: Information flow details.**

Nature Biotechnology, vol. 28, no. 10 Gingras, A-C et al.

A

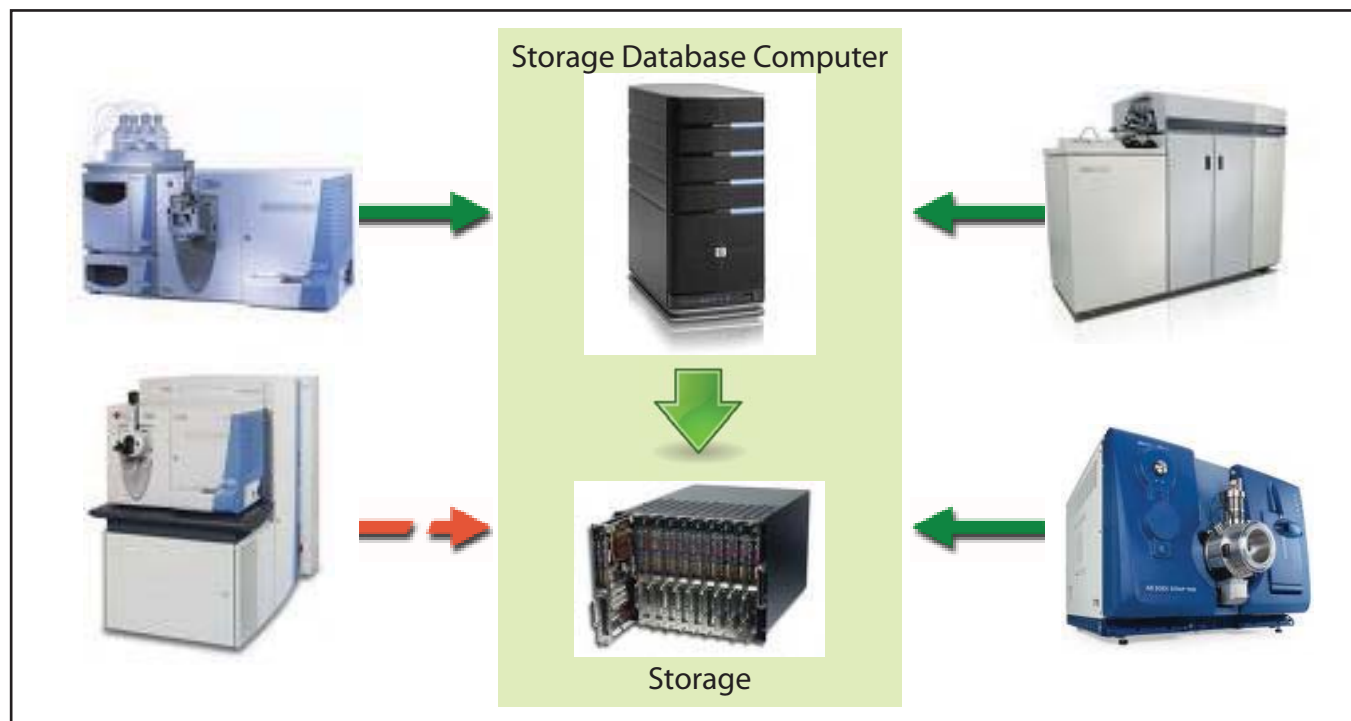

B

**Fetch Raw File**

Machine Name:

File Name:  OR

Date From:   TO

| ID              | Folder/File Name      | Size(KB) | Project Bait Sample | Date                | Search Task | Options |
|-----------------|-----------------------|----------|---------------------|---------------------|-------------|---------|
| <b>LTQ_DEMO</b> |                       |          |                     |                     |             |         |
| 22              | 8_MEPCE_pelletA.RAW   | 167,540  |                     | 2010-01-06 00:00:00 | 5           |         |
| 23              | 9_MEPCE_pelletB.RAW   | 180,071  |                     | 2010-01-06 00:00:00 | 5           |         |
| 32              | 8_MEPCE_pelletA.mzXML | 223,027  |                     | 2010-01-06 16:14:56 |             |         |
| 33              | 8_MEPCE_pelletA.mgf   | 387,447  |                     | 2010-01-06 16:52:42 |             |         |

unique identifier

RAW and converted files

retrieve information about sample

open search results page

open parent folder

download file on your computer

C

**Raw File Statistics**

Machine Name:

File Type:

Date From:   TO

Time Unit:  Month  Year

Display Contents:  File Size  Number of Files  GB  MB

Display Style:  Table  Bar  Line

D

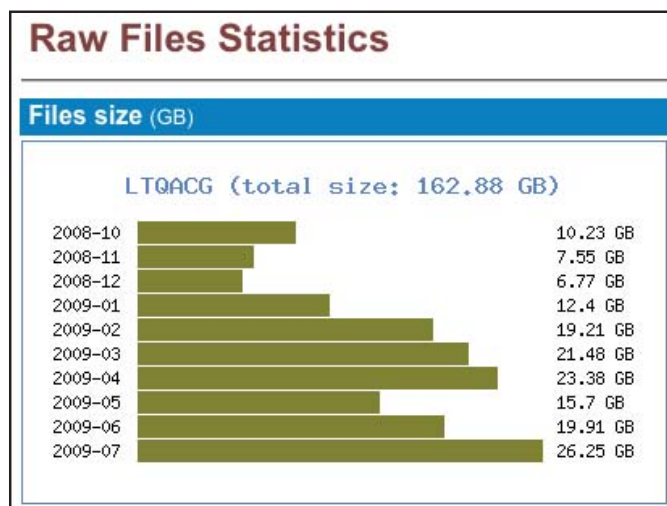

**Supplementary Figure 5. Data Management module: Storage.** A) Backup status. Each acquisition computer within the group or facility is automatically backed up every night on ProHits (files and folders are mirrored in the same organization as on the acquisition computer). Arrows indicate connection status: broken red arrows represent lost connections. B) Raw files retrieval. In Data Management Storage, the user can search for specific raw files (if desired, the searches can be limited by date or instrument), and retrieve all information related to these files. C) Raw file statistics. A function of the Data Management Storage is the reporting of the backed-up files on each of the instruments (or globally for the entire facility) for a given time period, and expressed as total file size or total file numbers; this facilitates reporting of the activities of the facility, and helps to identify bottlenecks. D) Example of a RAW file statistics report.



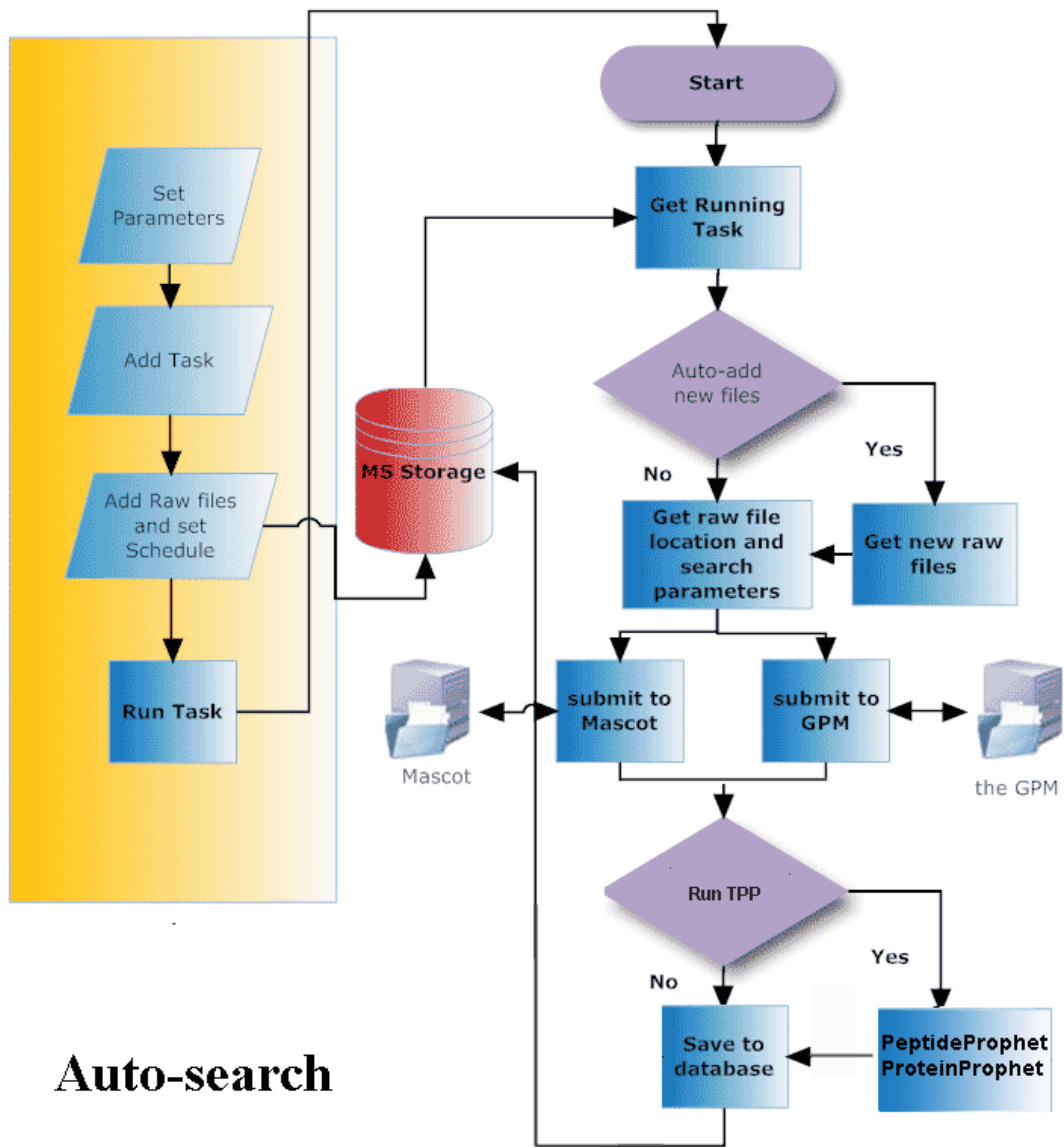

**Supplementary Figure 6. Data Management module: Autosearch Flowchart.**  
 Nature Biotechnology, vol. 28, no. 10 Gingras, A-C et al.

**A**

**B**

**C**

| File ID | [Folder ID] / File Name    | Size(KB) | Search Results                                                              | TPP                                                                                       |
|---------|----------------------------|----------|-----------------------------------------------------------------------------|-------------------------------------------------------------------------------------------|
| 22      | [21] / 8_MEPCE_pelletA.RAW | 167,540  | GPM <input checked="" type="checkbox"/> <input checked="" type="checkbox"/> | pepXML <input checked="" type="checkbox"/><br>protXML <input checked="" type="checkbox"/> |
| 23      | [21] / 9_MEPCE_pelletB.RAW | 180,071  | GPM <input checked="" type="checkbox"/> <input checked="" type="checkbox"/> | pepXML <input checked="" type="checkbox"/><br>protXML <input checked="" type="checkbox"/> |

**D**

**Supplementary Figure 7. Data Management module: Autosearch functions.** A) Initiating a search task. Each authorized user can select search engines and search parameters, and initiate searches using these parameters. Searches can be manually initiated, or conducted in a scheduled manner, as data is backed-up onto ProHits. B) Search task details. Each search task is assigned a unique identifier, and the conversion parameters, search parameters and protein sequence database and version are recorded. C) Search results page. Search results can be directly visualized from the search engine pages. Search engine results can also be transferred (parsed) into the ProHits Analyst module, after they have been linked to the appropriate Project, Bait, Experiment and Sample entries. The yellow chain link indicates that a sample has been manually linked to the Analyst module. D) Creating links to the Analyst module. Links to the Analyst module are created by clicking on the chain link icon and selecting a pre-existing sample from the Analyst module (or by creating a [new] sample).

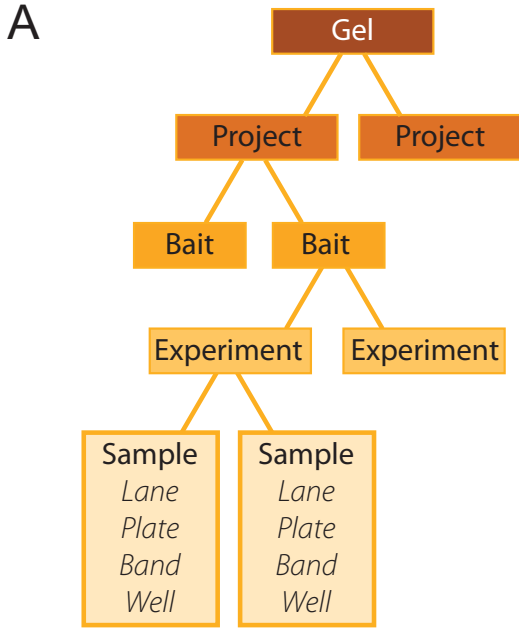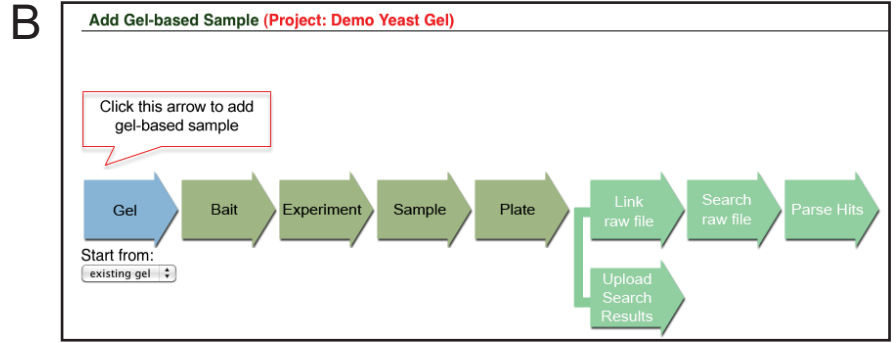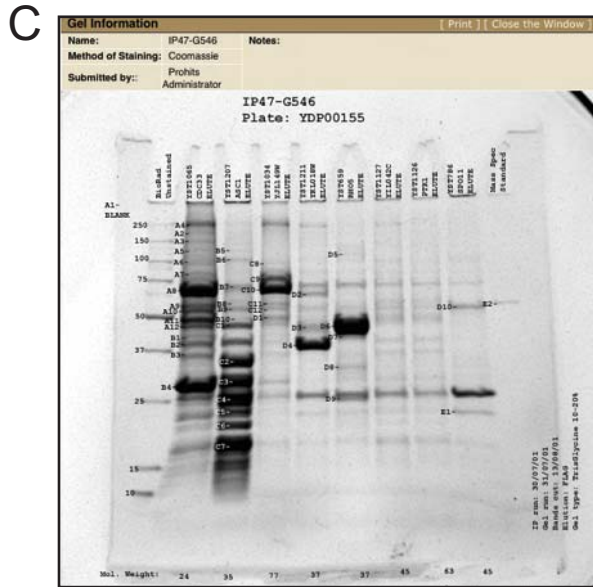

**D**

| # (Band/Sample) ID | Band/Sample Code | Intensity | Observed MW | Modification | Options |
|--------------------|------------------|-----------|-------------|--------------|---------|
| 1 25               | B06              |           | 100.000 kDa | None         |         |
| 2 34               | C02              |           | 32.000 kDa  | None         |         |
| 3 1                | G04              |           | 25.000 kDa  | None         |         |

**Supplementary Figure 8. Gel-Based Samples.** A) Data structure for Gel-based entries. B) ProHits Analyst interface for adding Gel-based samples. C) Example of an SDS-PAGE gel recorded in ProHits; the user can access the images from the Report by Gel option. D) Detail of gel-based sample entry.

A

**ProHits Analyst**  
Protein High-throughput Solution

Current user: Prohits Administrator

**Add Gel-free Sample (Project: Demo Human Gel Free)**

Click this arrow to add gel-free sample

Start from: new bait

Workflow: Bait → Experiment → Sample → Link raw file → Search raw file → Parse Hits

Additional step: Upload Search Results

Navigation menu:

- Home
- Create New Entry
- Add Gel-free Sample
- Add Gel-based Sample
- Upload Search Results
- Individual Reports
- Report by Bait

B

**Baits (Project: Demo Human Gel Free)** (Submit Gel Free Sample) [Add New Bait] [Bait List]

New gene for IP experiment  No gene (control) or non IP experiment

Bait ID:

Species: Homo sapiens (human)

Gene Name: MEPCE Epitope Tag: N-Flag [Detail] Bait Mutation:

If the bait sequence has been modified/alterred, you can first enter the wild type gene name to get its protein information, then modify the Gene Name as you wish and write the modification detail in Description field.

GeneID:

LocusTag:

This field is ignored if a Gene ID is specified, when you click Get Protein Info button

ProteinID:

ProteinID Type: GI

MW:  kDa

Family:

Vector:

Clone Number: N/A

Description:

**Protein Information**

|                  |                                                                                                                                                                                                                                             |
|------------------|---------------------------------------------------------------------------------------------------------------------------------------------------------------------------------------------------------------------------------------------|
| Gene ID:         | 56257                                                                                                                                                                                                                                       |
| Gene Name:       | MEPCE                                                                                                                                                                                                                                       |
| Gene Alias:      | BCDIN3<br>FLJ20257                                                                                                                                                                                                                          |
| Species:         | Homo sapiens (human)                                                                                                                                                                                                                        |
| Description:     | methylphosphate capping enzyme                                                                                                                                                                                                              |
| Accession:       | NP_062552.2                                                                                                                                                                                                                                 |
| GI Number:       | 47271406                                                                                                                                                                                                                                    |
| Acc Description: | AF264752_1 unknown [Homo sapiens]                                                                                                                                                                                                           |
| MW:              | 24.95 KDa                                                                                                                                                                                                                                   |
| Sequence:        | MVGLDIDSRLIHSARQNIHYLSEELRLPPQTLEGDPGAEEGEETTTRK<br>RSCFPASLTASRGPIAAPQVPLDGADTSVFPNNVVFVTGNYVLDLDRDLVE<br>AQTPEYDVVLCLSLTKWVHLNWDGDEGLKRMFRRIYRHLRPGGILVLEPQP<br>WSSYGKRRKLTETIYKNYRIQLKPEQFSSYLTPDVGFFSSYELVATPHN<br>TSKGFRPVVYLFHKARSPSH |

**Supplementary Figure 9. Creating a new bait in ProHits Analyst.** A) Screenshot of the entry page from Create New Entry > Add Gel-free sample. B) Bait description page. To add a new bait, type the official Gene Name, select the appropriate species, and click “Get Protein Info”. The protein information (derived from the ProHits protein DB) is displayed. Select “Pass Value” to populate the Bait list. Additional information may be added at this step, including epitope-tag, mutations in the bait protein, cross-references to internal cDNA databases, and additional descriptive notes.

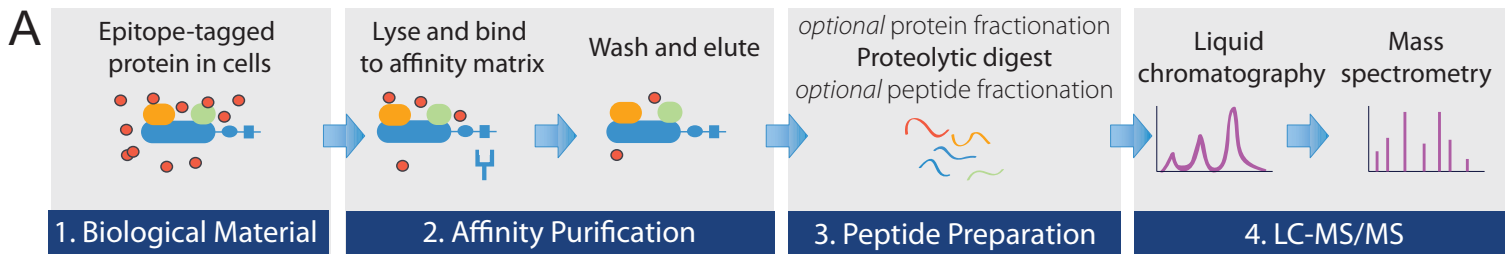

**B**

Experimental Details

|                        |                                                           |
|------------------------|-----------------------------------------------------------|
| Experiment Name:       | MEPCE_pelletA                                             |
| Biological Material:   | Tet Inducible Flp-In 293 clone 2010-1-1 [change] [view]   |
| Affinity Purification: | 293 cell lysis and FLAG IP 2010-1-7 [change] [view]       |
| Peptide Preparation:   | In-solution digest of IP samples 2010-1-7 [change] [view] |
| LC-MS:                 | Pressure-bomb load on LTO February 8 2010 [view]          |

Controlled Vocabularies of Experimental Details [Edit]

Interaction detection method: MI:0007 anti tag coimmunoprecipitation  
Cell type: 293 Flp-In T-REx Invitrogen

Additional Description:  
List here additional notes, e.g.:  
1) changes to standard protocol above;  
2) other experimental details not captured above;  
3) cross-references to internal databases;  
4) cross-references to notebooks;  
5) data ownership notes

Images:  
(western blot images) please only upload JPG and GIF formatted less than 5 MG image. [Browse...] [attach image]

Created by: Prohitis Administrator

**C** Protocol Detail [Close the Window]

|                  |                                                                                                                                                                                                                                                                                                                                                                                                                                                                                                                                                                                                                                                                                                                                                                                                                                                                                                                                                                                                                                                                                                                                                                                                                                                                                                                                                                                                                                                                                                                                                                                                                                                                                                                                                                                                                                                                                                                                                                                                                                                                                                                                                                                 |
|------------------|---------------------------------------------------------------------------------------------------------------------------------------------------------------------------------------------------------------------------------------------------------------------------------------------------------------------------------------------------------------------------------------------------------------------------------------------------------------------------------------------------------------------------------------------------------------------------------------------------------------------------------------------------------------------------------------------------------------------------------------------------------------------------------------------------------------------------------------------------------------------------------------------------------------------------------------------------------------------------------------------------------------------------------------------------------------------------------------------------------------------------------------------------------------------------------------------------------------------------------------------------------------------------------------------------------------------------------------------------------------------------------------------------------------------------------------------------------------------------------------------------------------------------------------------------------------------------------------------------------------------------------------------------------------------------------------------------------------------------------------------------------------------------------------------------------------------------------------------------------------------------------------------------------------------------------------------------------------------------------------------------------------------------------------------------------------------------------------------------------------------------------------------------------------------------------|
| Protocol ID:     | 15                                                                                                                                                                                                                                                                                                                                                                                                                                                                                                                                                                                                                                                                                                                                                                                                                                                                                                                                                                                                                                                                                                                                                                                                                                                                                                                                                                                                                                                                                                                                                                                                                                                                                                                                                                                                                                                                                                                                                                                                                                                                                                                                                                              |
| Protocol Type:   | Biological Material                                                                                                                                                                                                                                                                                                                                                                                                                                                                                                                                                                                                                                                                                                                                                                                                                                                                                                                                                                                                                                                                                                                                                                                                                                                                                                                                                                                                                                                                                                                                                                                                                                                                                                                                                                                                                                                                                                                                                                                                                                                                                                                                                             |
| Protocol Name:   | Tet Inducible Flp-In 293 clone                                                                                                                                                                                                                                                                                                                                                                                                                                                                                                                                                                                                                                                                                                                                                                                                                                                                                                                                                                                                                                                                                                                                                                                                                                                                                                                                                                                                                                                                                                                                                                                                                                                                                                                                                                                                                                                                                                                                                                                                                                                                                                                                                  |
| Protocol Detail: | Human [taxid:9606] cells [Flp-In T-REx 293 cells], passage 15 (Invitrogen), were transfected in a 6 well format with 0.2 ug of tagged DNA [pcDNA5-FLAG-protein] and 2 ug pOG44, using lipofectamine PLUS (Invitrogen), according to instructions of the manufacturer. On day 2, cells were trypsinized, and passaged into 3 x 10 cm plates, in a two-fold dilution series. On day 3, the medium was replaced by DMEM 5% Fetal bovine serum 5% calf serum 100 units/ml pen/strip 200 ug/ml hygromycin. Medium was replaced every 3-4 days until non-transfected cells died and isolated clones were ~2 mm in diameter (13-15 days). [Stable cell clones] were picked by trypsinization using 2 mm sterile 3MM filter papers dipped into trypsin. Paper circles were transferred into 24 well plates, each well containing 1 ml of complete growth containing 10% Tet system-tested FBS (Clontech 631106) medium with hygromycin. Clones were amplified into 3 x 24 well plates; one plate was used for monitoring the expression level -tet; another 1 after adding tet (1 ug/ml for 24 hours), and the other well was used to maintain cells. Selected clones were amplified (in selection medium), eventually to 8 x 15 cm plates, one of them being used for freezing back a low passage stock (4 tubes), one for maintaining the culture, and 6 for induction and harvesting (these were grown without hygromycin prior to harvesting). Cells at ~60-70% confluence were induced with 1 ug/ml tetracycline for 24 hours. Subconfluent cells (~85-95% confluent) were harvested as followed: medium was drained from the plate, 1 ml ice-cold PBS was added, and the cells were scraped (using a silicon cake spatula) and transferred to a 15 ml conical tube on ice. Cells were collected by centrifugation (5 min, 1500 G, 4 degrees C), the PBS was aspirated, and cells were resuspended in 10 ml ice-cold PBS prior to centrifugation (5 min, 1500 G, 4 degrees C). This step was repeated once more, remaining PBS is aspirated, and the weight of the cell pellet was determined. Cell pellets were frozen on dry ice, and transferred to -80 degrees C until needed. |
| Submitted by:    | Prohitis Administrator                                                                                                                                                                                                                                                                                                                                                                                                                                                                                                                                                                                                                                                                                                                                                                                                                                                                                                                                                                                                                                                                                                                                                                                                                                                                                                                                                                                                                                                                                                                                                                                                                                                                                                                                                                                                                                                                                                                                                                                                                                                                                                                                                          |
| Date Modified:   | 2010-01-07                                                                                                                                                                                                                                                                                                                                                                                                                                                                                                                                                                                                                                                                                                                                                                                                                                                                                                                                                                                                                                                                                                                                                                                                                                                                                                                                                                                                                                                                                                                                                                                                                                                                                                                                                                                                                                                                                                                                                                                                                                                                                                                                                                      |

**D** Controlled Vocabularies (Experimental Details) ?

Click "+" to add new selection or option

Interaction detection method: MI:0007 anti tag coimmunoprecipitation [+]

Cell type: 293 Flp-In T-REx Invitrogen [+]

Tissue source: [+]

Edit selection [+]

Selected Options

|                              |                                        |     |     |
|------------------------------|----------------------------------------|-----|-----|
| Interaction detection method | MI:0007 anti tag coimmunoprecipitation | [+] | [X] |
| Cell type                    | 293 Flp-In T-REx Invitrogen            | [+] | [X] |

[Pass Data] [Close]

**Supplementary Figure 10. Experimental annotation in the Analyst module.** A) Typical AP-MS workflow. Four levels of experimental annotation (as indicated) are used to describe each experiment. B) Experimental annotation page. Annotation is entered in three areas: at the top of the page, the user selects appropriate text-based protocols via drop-down menus, reflecting the four levels of experimental annotation indicated in A. In the grey area in the middle of the page, the user enters controlled vocabularies, as selected by the administrator, to describe the interaction. At the bottom of the page, the user enters free text details not captured in the previous two sections, and links to any desired images. C) Example of a text-based protocol. D) Example of controlled vocabulary.

**A**

| ID | File Name                 | Size    | Project Bait sample | Date                | Search Task | Download | Convert                  |
|----|---------------------------|---------|---------------------|---------------------|-------------|----------|--------------------------|
| 22 | 8_MEPCE_pelletA.RAW       | 167,540 |                     | 2010-01-06 00:00:00 | 5           |          | <input type="checkbox"/> |
| 31 | 16_FLAG_alone_pelletC.RAW | 102,264 |                     | 2010-01-06 00:00:00 | 5           |          | <input type="checkbox"/> |
| 30 | 17_FLAG_alone_pelletD.RAW | 143,728 |                     | 2010-01-06 00:00:00 | 5           |          | <input type="checkbox"/> |
| 29 | 15_RAF1_pelletB.RAW       | 152,160 |                     | 2010-01-06 00:00:00 | 5           |          | <input type="checkbox"/> |
| 28 | 14_RAF1_pelletA.RAW       | 166,849 |                     | 2010-01-06 00:00:00 | 5           |          | <input type="checkbox"/> |

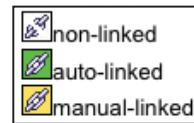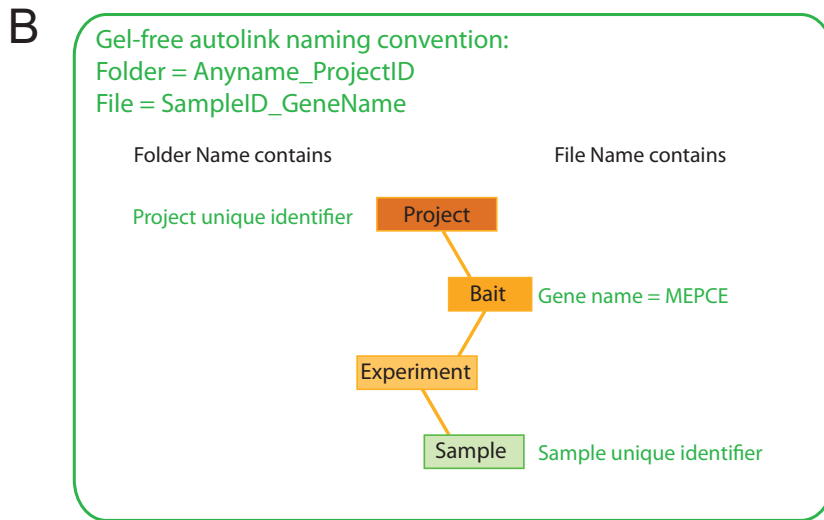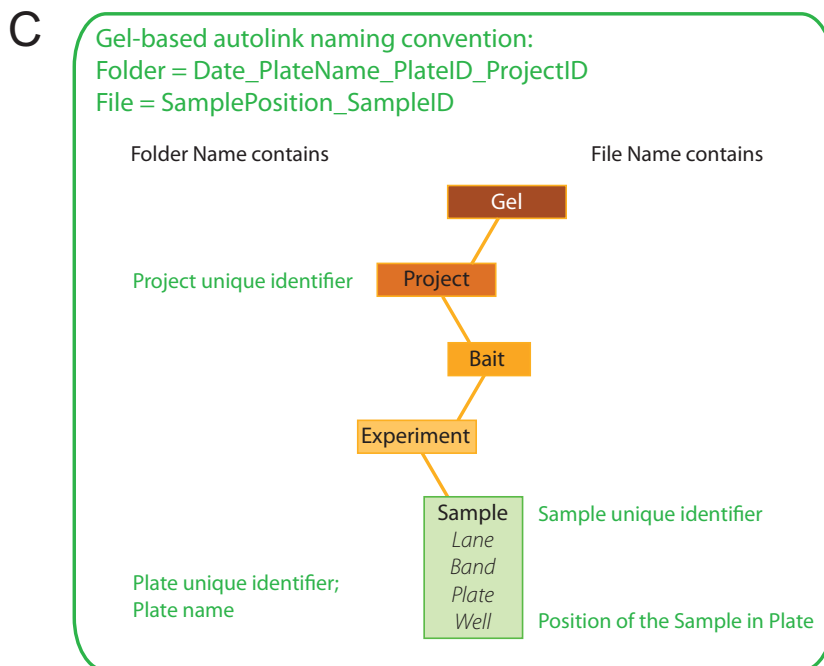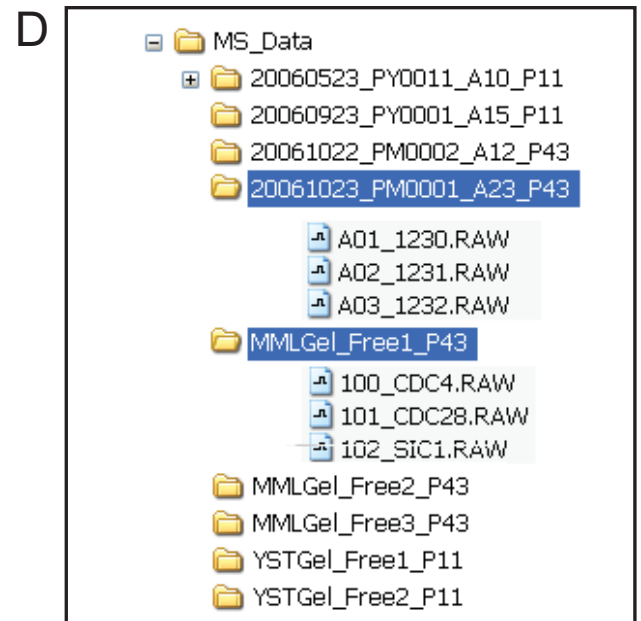

**Supplementary Figure 11. Links between the Analyst and Data Management modules.** A) View of existing links in the Data Management module. In the Data Management module, files that have not been linked are associated with a broken white chain icon. To manually link the file to an entry created in the Analyst module, the user can click on any white icon and select the desired bait, experiment and sample. The icon color will change to yellow, indicating that the link is now functional. Note that new baits, experiments and samples can also be defined when creating manual links. B) Naming convention for automatic links in gel-free projects. To create Automatic links (indicated by green chain link icons), a convention for the naming of both folders and files on the acquisition computer must be respected. Sample entries must first be created in the Analyst module. For gel-free samples, the folders can have any name, followed by underscore and project identifier. The files are named by a sample unique identifier, underscore, the four first characters of the sample name as defined in Analyst (usually = gene name). C) Naming convention for automatic links in gel-based projects. For gel-based samples, the folders are named by date, underscore, autosampler plate name, underscore, autosampler plate identifier, underscore, project identifier. Sample names are: plate position, underscore, sample identifier. D) Examples of file names on the acquisition computer..

**A Upload Search Results (Project: Demo Human Gel Free)**

Total Bands : 11 (1 Page) 1

| Bait ID | Bait Gene           | Experiment Exp / Gel / Lane (LaneNum) | Sample ID | Sample Name        | Uploaded By | Uploaded date | Uploaded File | Options |
|---------|---------------------|---------------------------------------|-----------|--------------------|-------------|---------------|---------------|---------|
| 6       | MEPCE(N-Flag.)      | MEPCE_pelletA gel free                | 40        | MEPCE_pelletA_A    |             |               |               |         |
| 10      | FLAG_alone(N-Flag.) | FLAG_alone_pelletD gel free           | 17        | FLAG_alone_pelletD |             |               |               |         |

**B Upload Search Results**

**Bait Information (6)** [GI][Gene][BioGRID]

|                |       |                  |                                   |
|----------------|-------|------------------|-----------------------------------|
| Bait Gene ID   | 56257 | Bait Gene Name   | MEPCE (N-Flag)                    |
| Bait Locus Tag |       | Bait MW (kDa)    | 24.950                            |
| Bait Clone     | N/A   | Bait Description | AF264752_1 unknown [Homo sapiens] |

**Experiment Information**

| Experiment ID | Name/Batch Name | Exp. Detail                                                                                                    | Exp. Status: | Inputed by            | Date       |
|---------------|-----------------|----------------------------------------------------------------------------------------------------------------|--------------|-----------------------|------------|
| 4             | MEPCE_pelletA   | Interaction detection method : MI:0007 anti tag coimmunoprecipitation; Cell type : 293 Flp-In T-REx Invitrogen | 11369        | Prohits Administrator | 2010-01-05 |

**Sample Information**

|           |                 |                       |
|-----------|-----------------|-----------------------|
| Sample ID | Sample Code     | Submitted by          |
| 40        | MEPCE_pelletA_A | Prohits Administrator |

**Upload Search Results File Type:**  TPP  Mascot  GPM

**Browse Mascot Files**

Mascot File :   [select .dat file](#)

**Filter**

Ions score cut-off <:   Require bold red peptide :

Save Protein score >   Max. number of hits :

Significance threshold p<:

Upload max file size: 800M Post max size: 800M

**Supplementary Figure 12. Uploading search results generated outside of ProHits.** A) Entry page for uploading search results - Bait, Experiments and Samples must first be specified. Clicking the “upload” icon opens a new window. B) Upload search result window: currently, uploads from the TransProteomics pipeline, or the search engines X!Tandem or Mascot are supported. To upload search results, simply select the appropriate radio button. For example, to process results from the Mascot search engine, select the desired files (.dat format) and appropriate parsing options. Note that while the full ProHits version allows you to monitor search parameters and parsing options, this functionality is not present when search results are uploaded from this page. We strongly suggest monitoring search parameters, database versions and parsing options throughout the course of the project.

A

Delete Next Level Modify Next Bait Report Bait Notes

**Baits (Project: Demo Human Gel Free)** Column Display Set [A] [Bait List]

Experiment status color keys [+] Bait groups [+]

select to compare Total Baits : 5 (1 Page) 1

| ID                          | GeneName   | Tag    | ProteinID | User                  | Status                                                                                                                                                                                                                                                                                                                                                                                                                                                                                                                                                                                                                                                         | Options |
|-----------------------------|------------|--------|-----------|-----------------------|----------------------------------------------------------------------------------------------------------------------------------------------------------------------------------------------------------------------------------------------------------------------------------------------------------------------------------------------------------------------------------------------------------------------------------------------------------------------------------------------------------------------------------------------------------------------------------------------------------------------------------------------------------------|---------|
| <input type="checkbox"/> 10 | FLAG_alone | N-Flag |           | Prohits Administrator | 1725<br>11474                                                                                                                                                                                                                                                                                                                                                                                                                                                                                                                                                                                                                                                  |         |
| <input type="checkbox"/> 9  | RAF1       | N-Flag | 4506401   | Prohits Administrator | 11062<br>1781                                                                                                                                                                                                                                                                                                                                                                                                                                                                                                                                                                                                                                                  |         |
| <input type="checkbox"/> 6  | MEPCE      | N-Flag | 47271406  | Prohits Administrator | 11369<br>11504<br>MEPCE_pelletA<br>(Interaction detection method: MI:0007 anti tag coimmunoprecipitation<br>Cell type: 293 Flp-In T-REx Invitrogen)<br>Tet Inducible Flp-In 293 clone (2010-1-1)<br>293 cell lysis and FLAG IP (2010-1-7)<br>In-solution digest of IP samples (2010-1-7)<br>Pressure-bomb load on LTQ (2010-1-7)<br>8_MEPCE_pelletA.RAW (167,540KB) [detail]<br># of Hits: 590 TPP hits:779<br>Expt. Notes:<br>List here additional notes, e.g.: 1) changes to standard protocol above; 2) other experimental details not captured above; 3) cross-references to internal databases; 4) cross-references to notebooks; 5) data ownership notes |         |

B

Exclusion Color Gel image Mascot GPM Hit Notes Yes No Possible In Progress

**Sample Report Hits (Project: Demo Human Gel Free)** [Cytoscape] [Export Sample Report] [Back to Sample List]

Bait Information (6) [GI][Gene][BioGrid]

|                |       |                  |                                   |
|----------------|-------|------------------|-----------------------------------|
| Bait Gene ID   | 56257 | Bait Gene Name   | MEPCE (N-Flag)                    |
| Bait Locus Tag |       | Bait MW (kDa)    | 24.950                            |
| Bait Clone     | N/A   | Bait Description | AF264752_1 unknown [Homo sapiens] |

Experiment Information

| Experiment ID | Name/Batch Name | Exp. Detail                                                                                                    | Exp. Status: | Inputed by            | Date       |
|---------------|-----------------|----------------------------------------------------------------------------------------------------------------|--------------|-----------------------|------------|
| 4             | MEPCE_pelletA   | Interaction detection method : MI:0007 anti tag coimmunoprecipitation; Cell type : 293 Flp-In T-REx Invitrogen | 11369        | Prohits Administrator | 2010-01-05 |

Sample Information

|           |               |                       |
|-----------|---------------|-----------------------|
| Sample ID | Sample Code   | Submitted by          |
| 8         | MEPCE_pelletA | Prohits Administrator |

[Show Filters]

Total Hits: 343

Update Frequency

Mascot Hits GPM Hits Mascot TPP Hits Mascot TPP Peptides Other TPP Hits Other TPP Peptides

| ID  | Protein  | Gene          | Score | Expect | Frequency | Redundant | MW kDa  | Description                                                                     | # Peptide | # Unique Peptide | Coverage | Links               | Filter | Option |
|-----|----------|---------------|-------|--------|-----------|-----------|---------|---------------------------------------------------------------------------------|-----------|------------------|----------|---------------------|--------|--------|
| 414 | 47271406 | 56257 / MEPCE | 1106  | 20%    |           |           | 74.310  | bin3; bicoid-interacting 3 [Homo sapiens]                                       | 152       | 19               | 43.80%   | [GI][Gene][BioGrid] |        |        |
| 425 | 4502491  | 708 / C1QBP   | 686   | 100%   |           |           | 31.340  | complement component 1; q subcomponent binding protein precursor [Homo sapiens] | 138       | 9                | 60.60%   | [GI][Gene][BioGrid] |        |        |
| 413 | 7661952  | 9733 / SART3  | 1463  | 20%    |           |           | 109.860 | squamous cell carcinoma antigen recognized by T cells 3 [Homo sapiens]          | 105       | 20               | 26.90%   | [GI][Gene][BioGrid] |        |        |
| 416 | 55956788 | 4691 / NCL    | 1011  | 100%   |           |           | 76.570  | nucleolin [Homo sapiens]                                                        | 84        | 16               | 25.80%   | [GI][Gene][BioGrid] |        |        |
| 430 | 10835063 | 4869 / NPM1   | 657   | 100%   | 40353734; |           | 32.550  | nucleophosmin 1 isoform 1 [Homo sapiens]                                        | 65        | 7                | 36.70%   | [GI][Gene][BioGrid] |        |        |

**Supplementary Figure 13. Analyst module: Bait, Experiment and Sample Reports.** A) Entry page of the Bait Report displaying the list of all baits analyzed. Clicking on any of the colored “Status” bars expands experimental details associated with a given bait. Clicking on the graph in the Options column opens up an unfiltered bait report. Note that the Bait, Experiment and Sample Report interfaces are identical: the sole difference is that all samples associated with a common bait are grouped in the Bait Report whereas they are viewed individually in a Sample Report (Experimental Reports provide an intermediate view). B) Sample Report view. Mass spectrometry results are shown at the bottom of the page (here Mascot search results are displayed). Multiple parameters, including the number of total and unique peptides, and sequence coverage, are displayed for each hit, alongside the frequency of detection for each hit within the entire project. Links to external databases (NCBI, BioGRID) and original search results pages are also provided. The Filter column flags hits that may be removed after application of one or more Bio-Filters and Experimental Filters. In the upper right corner is a bar graph indicating the numbers of hits that would be removed by applying each of the indicated filters. To view available filters and apply filtering options, select the “Show Filters” button above the results table.



A

**[Hide Filters]**

**Experiment Filters**

Score < 0  Expect > 1  Coverage < %

Peptide  Unique Peptide < 2  Frequency > 3 %

FLAG\_top\_contaminant

Carry Over  Spill Over  Auto-MW Exclusion

**Bio Filters**

Ribosomal  Cytoskeleton  Bait  Keratin

Artifact Protein  Translation Elongation Factor  DEAD/H Box  Albumin

**BioGRID overlap**

Physical HTP  Physical NON-HTP  Genetic HTP  Genetic NON-HTP

**No Exclusion** **Apply Exclusion**

B

| Mascot Hits |           |               | GPM Hits |        | Mascot TPP Hits |            | Mascot TPP Peptides |                                                                        | GPM TPP Hits |                  | GPM TPP Peptides |                      |        |                                                                                                                                                                             |
|-------------|-----------|---------------|----------|--------|-----------------|------------|---------------------|------------------------------------------------------------------------|--------------|------------------|------------------|----------------------|--------|-----------------------------------------------------------------------------------------------------------------------------------------------------------------------------|
| ID          | Protein   | Gene          | Score    | Expect | Frequency       | Redundant  | MW kDa              | Description                                                            | # Peptide    | # Unique Peptide | Coverage         | Links                | Filter | Option                                                                                                                                                                      |
| 415         | 47271406  | 56257 / MEPCE | 1106     | 20%    |                 |            | 74.310              | bin3; bicoid-interacting 3 [Homo sapiens]                              | 152          | 19               | 43.80%           | [GI][Gene] [BioGRID] |        |   |
| 413         | 7661952   | 9733 / SART3  | 1463     | 20%    |                 |            | 109.860             | squamous cell carcinoma antigen recognized by T cells 3 [Homo sapiens] | 105          | 20               | 26.90%           | [GI][Gene] [BioGRID] | ★      |   |
| 419         | 109809739 | 51574 / LARP7 | 955      | 20%    |                 | 109809741; | 66.860              | La ribonucleoprotein domain family; member 7 [Homo sapiens]            | 53           | 14               | 25.80%           | [GI][Gene] [BioGRID] | ★      |   |
| 468         | 7706425   | 51691 / LSM8  | 305      | 20%    |                 |            | 10.400              | U6 snRNA-associated Sm-like protein LSM8 [Homo sapiens]                | 49           | 3                | 61.50%           | [GI][Gene] [BioGRID] |        |   |
| 441         | 10863889  | 9092 / SART1  | 556      | 20%    |                 |            | 90.200              | squamous cell carcinoma antigen recognized by T cells 1 [Homo sapiens] | 28           | 9                | 17.60%           | [GI][Gene] [BioGRID] | ★      |   |

**Supplementary Figure 14. Analyst module: Filtering Search Results.** A) List of the available filtering options for a project. Experimental Filters are based upon the mass spectrometric data or contaminants related to a specific project, while Bio-Filters are maintained by the administrator in the Admin Office. “BioGRID overlap” is not a filter per se, but this option puts a note in the “Filter” column to indicate those bait-to-hit relationships that have been previously reported. B) Filtered mass spectrometry results. This is the same list as in Figure 9, after likely contaminants have been removed. Filtered or unfiltered lists can be exported or displayed in the Cytoscape viewer.



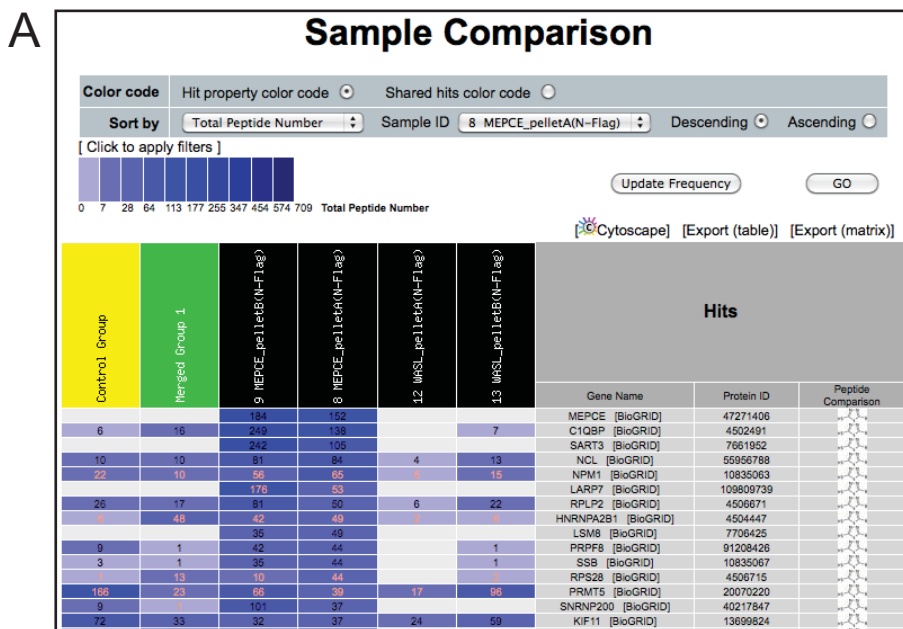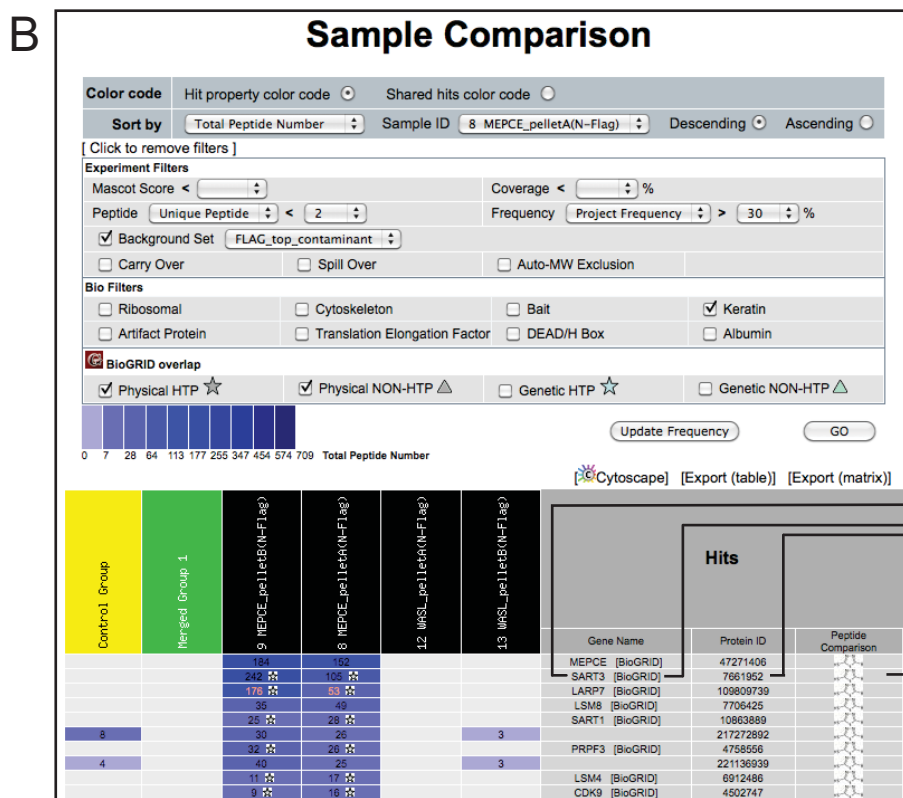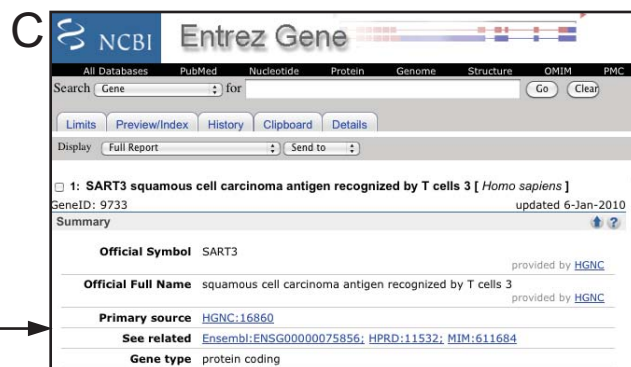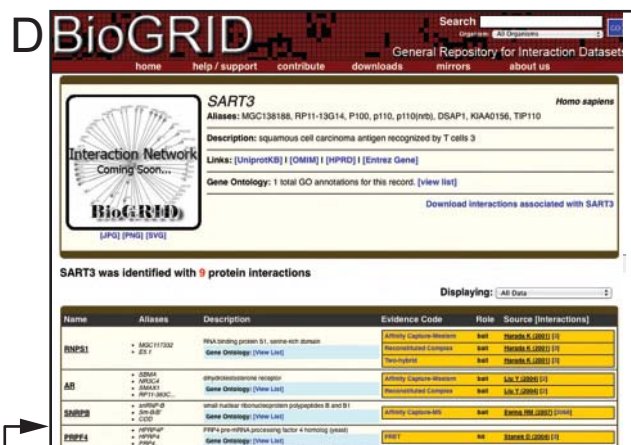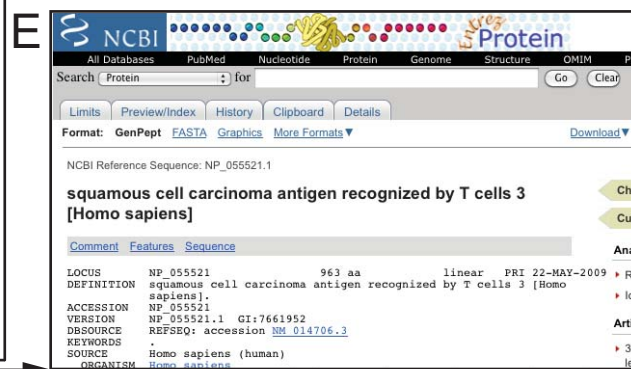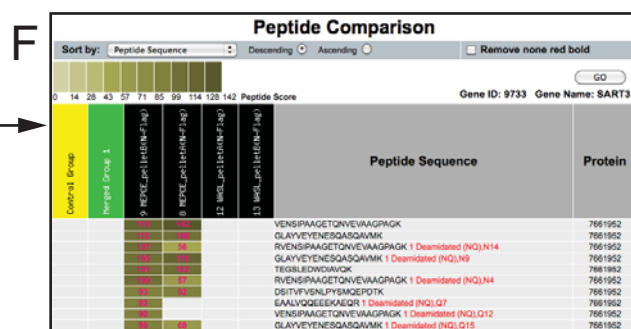

**Supplementary Figure 16. Analyst module: Comparison page.** A) An unfiltered Comparison page. Individual Baits, Samples, or user-defined groups are listed in the columns, while hits are displayed in rows. In this case, the color-coding in each cell reflects the total number of peptides detected for each hit. Other parameters (e.g. search engine scores, unique peptides, sequence coverage, etc.) may also be displayed. Each attribute is assigned a different color scale. The numbers in each cell are the numerical value for the parameter displayed. Mousing over each cell opens a pop-up window detailing additional information. B) The same dataset as in (A), after filtering. Filters applied here were: (i) removal of proteins present on an internal list of “FLAG\_top\_contaminants”, (ii) removal of proteins detected in >30% of all samples analyzed within the project, or (iii) detected with less than 2 unique peptides. The list is sorted to highlight the MEPCE sample. In addition to filtering, the “BioGRID Overlap” function was applied to mark hits previously reported in the BioGRID interaction database; these are represented by stars or triangles in each cell, depending on the experimental scale for the BioGRID deposition. C-E) External links for a given hit. F) Peptide Comparison allows the user to view all peptides identified for a given hit across all experiments loaded into the comparison report.

# BaitID Comparison

Color code  Hit property color code  Shared hits color code

Sort by  BaitID ID

[ Click to apply filters ]

0 7 28 64 113 177 255 347 454 574 709 Total Peptide Number

Cytoscape] [Export (table)] [Export (matrix)]

| Control Group | 8 WASL(N-Flag) | 9 RAF1(N-Flag) | 7 EIF4A2(N-Flag) | 6 MEPEE(N-Flag) | Hits                |            |                    |
|---------------|----------------|----------------|------------------|-----------------|---------------------|------------|--------------------|
|               |                |                |                  |                 | Gene Name           | Protein ID | Peptide Comparison |
|               | 303            |                |                  |                 | WASL [BioGRID]      | 51702526   |                    |
| 13            | 131            | 6              |                  | 3               | ACTB [BioGRID]      | 4501885    |                    |
| 166           | 96             | 99             | 23               | 66              | PRMT5 [BioGRID]     | 20070220   |                    |
|               | 82             |                |                  |                 | ACTC1 [BioGRID]     | 4885049    |                    |
| 72            | 59             | 41             | 33               | 37              | KIF11 [BioGRID]     | 13699824   |                    |
|               | 52             | 5              |                  | 3               | POTEE [BioGRID]     | 134133226  |                    |
|               | 51             | 5              | 2                | 3               | ACTA1 [BioGRID]     | 4501881    |                    |
|               | 40             |                |                  |                 | WIPF3 [BioGRID]     | 122937496  |                    |
| 161           | 37             | 52             | 8                | 39              | WDR77 [BioGRID]     | 13129110   |                    |
| 15            | 34             | 24             | 6                | 47              | PPM1B [BioGRID]     | 4505995    |                    |
| 41            | 33             | 274            | 26               | 27              | TUBB [BioGRID]      | 29788785   |                    |
| 21            | 32             | 104            | 13               | 17              | HSPA8 [BioGRID]     | 5729877    |                    |
|               | 32             |                |                  |                 | WIPF2 [BioGRID]     | 18959210   |                    |
| 65            | 32             | 38             | 3                | 7               | KRT1 [BioGRID]      | 119395750  |                    |
| 36            | 28             | 275            | 17               | 15              | TUBB2C [BioGRID]    | 5174735    |                    |
| 31            | 25             | 23             | 13               | 19              | CLNS1A [BioGRID]    | 4502891    |                    |
| 48            | 23             | 150            | 20               | 29              | HSPA1B [BioGRID]    | 167466173  |                    |
| 26            | 22             | 17             | 17               | 81              | RPLP2 [BioGRID]     | 4506671    |                    |
| 26            | 19             |                | 13               | 17              | TUBA1C [BioGRID]    | 14389309   |                    |
| 65            | 18             | 13             | 4                | 9               | FLNA [BioGRID]      | 116063573  |                    |
| 8             | 18             | 17             | 8                | 8               | HSPA5 [BioGRID]     | 16507237   |                    |
| 35            | 18             | 8              | 8                | 6               | LOC651751 [BioGRID] | 169218253  |                    |
| 12            | 16             | 4              | 2                | 8               | SF3B3 [BioGRID]     | 54112121   |                    |
| 19            | 16             | 5              | 2                | 8               | RBM10 [BioGRID]     | 20127479   |                    |
| 22            | 15             | 18             | 10               | 65              | NPM1 [BioGRID]      | 10835063   |                    |
| 14            | 14             | 5              | 33               | 44              | RPS3 [BioGRID]      | 15718687   |                    |
| 18            | 13             | 9              | 18               | 30              | HNRNPM [BioGRID]    | 14141152   |                    |
| 10            | 13             | 14             | 10               | 84              | NCL [BioGRID]       | 55956788   |                    |
| 12            | 13             | 4              | 67               | 16              | RPSA [BioGRID]      | 9845502    |                    |
| 20            | 12             | 16             | 3                | 5               | KRT9 [BioGRID]      | 55956899   |                    |
| 22            | 11             | 15             | 9                | 10              | STK38 [BioGRID]     | 6005814    |                    |
| 11            | 10             | 2              | 5                | 22              | ILF3 [BioGRID]      | 24234753   |                    |
|               | 10             |                | 40               | 17              | RPS21 [BioGRID]     | 4506699    |                    |
| 18            | 10             | 28             |                  |                 |                     | 195972866  |                    |
| 20            | 9              | 14             | 7                | 44              | RPLP0 [BioGRID]     | 4506667    |                    |
| 10            | 9              | 7              | 3                | 6               | TRIM28 [BioGRID]    | 5032179    |                    |
| 4             | 9              | 3              | 1                | 16              | RPL5 [BioGRID]      | 14591909   |                    |
| 1             | 8              | 35             | 3                | 5               | HSPA9 [BioGRID]     | 24234688   |                    |
| 7             | 8              | 8              | 36               | 61              | HNRNPA1 [BioGRID]   | 4504445    |                    |
| 11            | 8              | 3              | 14               | 26              | DHX9 [BioGRID]      | 100913206  |                    |
|               | 8              |                |                  |                 | WIPF1 [BioGRID]     | 38373695   |                    |
| 4             | 8              | 1              | 2                | 1               | PTS [BioGRID]       | 4506331    |                    |
| 23            | 7              | 3              |                  | 1               | THRAP3 [BioGRID]    | 167234419  |                    |
| 2             | 7              | 2              | 8                | 2               | HNRNPL [BioGRID]    | 52632383   |                    |
| 6             | 7              | 11             | 16               | 249             | C1QBP [BioGRID]     | 4502491    |                    |
| 2             | 7              | 4              |                  | 3               | PPM1A [BioGRID]     | 10337595   |                    |
| 4             | 7              | 3              | 4                | 6               | RPL11 [BioGRID]     | 15431290   |                    |
| 2             | 6              |                |                  | 9               | SF3B2 [BioGRID]     | 55749531   |                    |
| 13            | 6              | 1              |                  | 1               | IARS [BioGRID]      | 94721239   |                    |

Supplementary Figure 17. Unfiltered data for main text Figure 1b. Page 1 of 13.

|    |   |     |    |    |                     |           |  |
|----|---|-----|----|----|---------------------|-----------|--|
| 12 | 6 | 2   |    | 2  | SF3B1 [BioGRID]     | 54112117  |  |
| 2  | 6 | 1   | 2  | 5  | DHX15 [BioGRID]     | 68509926  |  |
| 6  | 6 | 3   | 48 | 49 | HNRNPA2B1 [BioGRID] | 4504447   |  |
| 11 | 6 | 6   | 7  | 25 | HNRNPH1 [BioGRID]   | 5031753   |  |
| 6  | 6 |     | 6  | 8  | DDX5 [BioGRID]      | 4758138   |  |
| 24 | 6 | 3   |    |    | CLTC [BioGRID]      | 4758012   |  |
| 8  | 6 | 4   | 12 | 15 | DDX17 [BioGRID]     | 38201710  |  |
| 7  | 6 | 12  |    |    | KRT2 [BioGRID]      | 47132620  |  |
|    | 6 |     |    |    | KRT6A [BioGRID]     | 5031839   |  |
| 2  | 6 | 1   |    | 1  | PRSS1 [BioGRID]     | 4506145   |  |
|    | 5 |     |    |    | NCK2 [BioGRID]      | 52630423  |  |
| 10 | 5 | 2   |    |    | RARS [BioGRID]      | 15149476  |  |
| 8  | 5 | 1   | 5  | 19 | RPL9 [BioGRID]      | 15431303  |  |
| 3  | 5 | 1   | 7  | 10 | HNRNPA3 [BioGRID]   | 34740329  |  |
| 5  | 5 | 3   | 2  | 4  | EEF1B2 [BioGRID]    | 4503477   |  |
| 2  | 5 |     | 13 | 15 | RPS25 [BioGRID]     | 4506707   |  |
| 4  | 5 | 1   |    | 1  | SPIN1 [BioGRID]     | 112293285 |  |
| 6  | 5 | 5   | 6  | 24 | RPLP1 [BioGRID]     | 4506669   |  |
| 2  | 5 | 5   | 10 | 23 | HIST1H1C [BioGRID]  | 4885375   |  |
|    | 5 | 2   | 2  |    | SNRPB [BioGRID]     | 4507125   |  |
| 4  | 5 | 5   | 1  | 28 | RPL7A [BioGRID]     | 4506661   |  |
| 6  | 4 | 1   |    |    | EEF1D [BioGRID]     | 25453472  |  |
| 28 | 4 | 6   | 1  | 1  | CCT8 [BioGRID]      | 48762932  |  |
| 15 | 4 |     | 3  | 25 | XRCC6 [BioGRID]     | 4503841   |  |
| 6  | 4 |     | 1  | 20 | RPL10A [BioGRID]    | 15431288  |  |
| 17 | 4 | 1   |    | 6  | MAP1B [BioGRID]     | 153945728 |  |
| 6  | 4 | 1   |    | 2  | DCTN2 [BioGRID]     | 5453629   |  |
| 15 | 4 | 3   | 10 | 6  | LARS [BioGRID]      | 108773810 |  |
| 13 | 4 | 7   |    |    | EEF1A1 [BioGRID]    | 4503471   |  |
| 1  | 4 | 1   | 1  | 5  |                     | 217330646 |  |
| 7  | 4 | 6   | 3  | 22 | HNRNPD [BioGRID]    | 14110414  |  |
| 4  | 4 |     | 6  | 20 | HNRNPR [BioGRID]    | 5031755   |  |
| 1  | 4 |     | 4  | 12 | HNRNPA0 [BioGRID]   | 5803036   |  |
| 26 | 4 | 274 | 5  | 4  | HSP90AA1 [BioGRID]  | 154146191 |  |
| 14 | 3 | 5   |    |    | CCT2 [BioGRID]      | 5453603   |  |
| 1  | 3 | 1   | 2  | 7  | SFRS5 [BioGRID]     | 86991438  |  |
| 8  | 3 | 1   | 69 |    | EIF3F [BioGRID]     | 4503519   |  |
| 2  | 3 | 1   |    |    | WARS [BioGRID]      | 47419914  |  |
| 4  | 3 |     | 4  | 27 | RPL18 [BioGRID]     | 4506607   |  |
| 4  | 3 | 2   | 25 | 22 | RPS8 [BioGRID]      | 4506743   |  |
| 3  | 3 | 1   | 5  | 9  | ILF2 [BioGRID]      | 24234747  |  |
| 1  | 3 |     | 4  | 4  | SFRS2 [BioGRID]     | 47271443  |  |
| 9  | 3 | 1   | 1  | 2  | EEF1G [BioGRID]     | 4503481   |  |
| 5  | 3 | 3   | 1  | 14 | RPL12 [BioGRID]     | 4506597   |  |
| 11 | 3 | 4   | 11 | 5  | EIF4B [BioGRID]     | 50053795  |  |
| 3  | 3 |     |    | 2  | SR140 [BioGRID]     | 122937227 |  |
| 3  | 3 |     |    |    | PRDX1 [BioGRID]     | 4505591   |  |
| 9  | 3 | 3   |    |    | VCP [BioGRID]       | 6005942   |  |
| 4  | 3 | 1   |    | 40 |                     | 221136939 |  |
| 8  | 3 | 4   | 1  | 30 |                     | 217272892 |  |
| 2  | 3 |     | 26 | 15 | RPS18 [BioGRID]     | 11968182  |  |
|    | 3 |     |    |    | PRDX4 [BioGRID]     | 5453549   |  |
| 13 | 3 | 4   | 2  |    | TCP1 [BioGRID]      | 57863257  |  |
| 2  | 3 |     | 1  | 6  | RPL22 [BioGRID]     | 4506613   |  |
| 7  | 3 |     | 7  | 7  | EIF2S2 [BioGRID]    | 29826335  |  |
| 6  | 3 | 1   |    | 1  | STK38L [BioGRID]    | 24307971  |  |
| 2  | 3 | 2   | 2  | 5  | RPL23A [BioGRID]    | 17105394  |  |
| 8  | 3 | 8   | 15 | 30 | HNRNPK [BioGRID]    | 14165435  |  |
| 3  | 3 | 4   | 6  | 16 | HNRNPAB [BioGRID]   | 55956919  |  |
| 4  | 3 | 3   |    |    | KRT14 [BioGRID]     | 15431310  |  |
| 1  | 2 | 3   | 3  | 15 | RPL10P16 [BioGRID]  | 41151097  |  |
| 1  | 2 |     |    | 1  | LTBP1 [BioGRID]     | 46249412  |  |
| 5  | 2 | 14  | 2  | 2  | RCN2 [BioGRID]      | 4506457   |  |
| 2  | 2 |     | 2  | 31 | DDX21 [BioGRID]     | 50659095  |  |
|    | 2 |     |    | 3  | NOP56 [BioGRID]     | 32483374  |  |
| 8  | 2 | 4   |    |    | CCT4 [BioGRID]      | 38455427  |  |
| 5  | 2 | 1   | 9  | 14 | EIF2S1 [BioGRID]    | 4758256   |  |
| 15 | 2 | 4   | 4  | 49 | PRKDC [BioGRID]     | 13654237  |  |
|    | 2 | 1   |    | 2  | PDHA1 [BioGRID]     | 4505685   |  |
| 5  | 2 | 2   |    |    | LOC652147 [BioGRID] | 169218225 |  |
| 1  | 2 |     | 1  |    | EXOSC6 [BioGRID]    | 17402904  |  |
| 1  | 2 |     | 1  | 5  | RPL36 [BioGRID]     | 16117794  |  |
| 3  | 2 |     |    |    | OAT [BioGRID]       | 4557809   |  |

|    |   |    |     |    |                     |           |  |
|----|---|----|-----|----|---------------------|-----------|--|
|    | 2 |    |     |    | ARHGEF10L [BioGRID] | 58761492  |  |
| 3  | 2 | 1  | 1   |    | TRIM21 [BioGRID]    | 15208660  |  |
| 6  | 2 | 2  | 162 |    | EIF3B [BioGRID]     | 33239445  |  |
| 2  | 2 | 1  | 131 |    | EIF3H [BioGRID]     | 4503515   |  |
| 2  | 2 |    |     |    | SF3A1 [BioGRID]     | 5032087   |  |
|    | 2 |    |     | 21 | DDX23 [BioGRID]     | 41327771  |  |
| 3  | 2 |    | 6   | 3  | HNRPDL [BioGRID]    | 14110407  |  |
| 7  | 2 | 2  | 66  | 7  | PABPC1 [BioGRID]    | 46367787  |  |
|    | 2 | 43 | 1   | 1  | IRS4 [BioGRID]      | 4504733   |  |
| 3  | 2 | 1  | 8   | 5  | RPS6 [BioGRID]      | 17158044  |  |
|    | 2 |    |     |    | DDX3Y [BioGRID]     | 13514809  |  |
| 11 | 2 | 1  | 231 |    | EIF3A [BioGRID]     | 4503509   |  |
| 5  | 2 |    |     | 1  | SNRPA1 [BioGRID]    | 50593002  |  |
|    | 2 |    |     |    | CAPZB [BioGRID]     | 4826659   |  |
| 10 | 2 | 4  | 3   | 1  | QPCT [BioGRID]      | 6912618   |  |
| 2  | 2 |    |     |    | NUDT21 [BioGRID]    | 5901926   |  |
| 4  | 2 | 3  | 1   | 2  | RIOK1 [BioGRID]     | 23510356  |  |
| 5  | 2 | 9  | 2   | 5  | SNRPD3 [BioGRID]    | 4759160   |  |
| 1  | 2 | 3  | 10  | 17 | RPS19 [BioGRID]     | 4506695   |  |
| 2  | 2 | 3  |     | 1  | RBBP7 [BioGRID]     | 4506439   |  |
|    | 2 |    |     |    | NCK1 [BioGRID]      | 5453754   |  |
| 5  | 2 |    | 7   | 27 | RPS16 [BioGRID]     | 4506691   |  |
| 12 | 2 | 1  | 3   |    | EPRS [BioGRID]      | 62241042  |  |
| 56 | 2 | 13 | 2   | 5  | IVNS1ABP [BioGRID]  | 24475847  |  |
| 15 | 2 | 3  | 17  | 22 | RPS4X [BioGRID]     | 4506725   |  |
| 1  | 2 | 1  | 1   | 8  | SRP9 [BioGRID]      | 4507217   |  |
| 1  | 2 | 2  | 13  | 44 | RPS28 [BioGRID]     | 4506715   |  |
| 15 | 2 | 1  | 15  | 12 | RPS14 [BioGRID]     | 5032051   |  |
|    | 2 | 1  | 35  | 29 | YBX1 [BioGRID]      | 34098946  |  |
| 4  | 2 |    |     |    | RPL7 [BioGRID]      | 15431301  |  |
| 13 | 2 | 2  |     |    | CCT5 [BioGRID]      | 24307939  |  |
| 4  | 2 |    | 10  | 20 | HNRNPU [BioGRID]    | 14141161  |  |
|    | 2 |    |     |    | ENO1 [BioGRID]      | 4503571   |  |
| 1  | 2 |    |     |    | DCD [BioGRID]       | 16751921  |  |
|    | 2 | 1  |     |    | GAPDH [BioGRID]     | 7669492   |  |
|    | 2 |    |     |    | CKB [BioGRID]       | 21536286  |  |
| 1  | 2 |    |     |    | VIM [BioGRID]       | 62414289  |  |
| 3  | 2 | 3  |     |    | DDB1 [BioGRID]      | 148529014 |  |
| 7  | 2 |    |     | 1  | C11orf84 [BioGRID]  | 39930523  |  |
|    | 2 |    |     |    | FBXO38 [BioGRID]    | 45505155  |  |
| 3  | 2 |    |     |    | LOC654340 [BioGRID] | 169165505 |  |
|    | 1 |    |     |    | P4HB [BioGRID]      | 20070125  |  |
| 7  | 1 |    | 1   |    | BCLAF1 [BioGRID]    | 7661958   |  |
|    | 1 |    |     |    | PPIB [BioGRID]      | 4758950   |  |
| 1  | 1 |    |     |    | HTATSF1 [BioGRID]   | 21361437  |  |
| 1  | 1 | 1  |     | 21 | KPNA2 [BioGRID]     | 4504897   |  |
| 1  | 1 | 3  |     |    | HSPA4 [BioGRID]     | 38327039  |  |
| 3  | 1 | 1  | 2   | 4  | SRP14 [BioGRID]     | 149999611 |  |
| 4  | 1 | 3  | 1   | 3  |                     | 217416381 |  |
| 3  | 1 | 1  |     |    | PSMC1 [BioGRID]     | 24430151  |  |
| 3  | 1 | 20 |     |    | DNAJA1 [BioGRID]    | 4504511   |  |
| 3  | 1 | 1  | 62  |    | EIF3G [BioGRID]     | 49472822  |  |
|    | 1 |    |     |    | DLST [BioGRID]      | 19923748  |  |
| 1  | 1 | 6  | 1   | 19 | RPL23 [BioGRID]     | 4506605   |  |
|    | 1 |    |     |    | RBBP5 [BioGRID]     | 53759148  |  |
| 4  | 1 | 2  |     |    | PSMC5 [BioGRID]     | 24497435  |  |
|    | 1 |    |     |    | P4HA1 [BioGRID]     | 63252886  |  |
|    | 1 | 1  |     |    | DLAT [BioGRID]      | 31711992  |  |
| 1  | 1 | 1  | 1   |    | PRMT1 [BioGRID]     | 150456457 |  |
| 2  | 1 | 1  | 2   | 15 | RPL17 [BioGRID]     | 4506617   |  |
| 6  | 1 | 2  | 12  | 13 | RPS15A [BioGRID]    | 14165469  |  |
| 2  | 1 |    | 1   | 14 | RPL15 [BioGRID]     | 15431293  |  |
| 3  | 1 | 1  | 1   | 44 | SSB [BioGRID]       | 10835067  |  |
|    | 1 |    |     |    | CDC42 [BioGRID]     | 4757952   |  |
| 9  | 1 | 3  |     |    | CCT7 [BioGRID]      | 5453607   |  |
| 1  | 1 | 2  |     | 1  | PRKAR1A [BioGRID]   | 4506063   |  |
| 1  | 1 |    |     | 1  | SNRPC [BioGRID]     | 4507127   |  |
| 1  | 1 | 2  | 1   | 8  | RPL19 [BioGRID]     | 4506609   |  |
| 1  | 1 |    |     | 1  | RBM17 [BioGRID]     | 14249678  |  |
| 2  | 1 |    | 2   | 9  | SNRPE [BioGRID]     | 4507129   |  |
| 1  | 1 |    |     | 4  | EXOSC2 [BioGRID]    | 19923403  |  |
| 5  | 1 |    |     |    | VARS [BioGRID]      | 5454158   |  |
|    | 1 | 1  |     | 1  | NOP58 [BioGRID]     | 7706254   |  |

|    |   |     |     |    |                     |           |  |
|----|---|-----|-----|----|---------------------|-----------|--|
| 1  | 1 | 7   |     |    | ATP5A1 [BioGRID]    | 4757810   |  |
| 4  | 1 |     |     |    | DDX46 [BioGRID]     | 41327773  |  |
| 4  | 1 | 1   | 21  | 17 | RPS10 [BioGRID]     | 4506679   |  |
| 2  | 1 | 2   |     |    | PSMD6 [BioGRID]     | 7661914   |  |
| 4  | 1 | 1   | 8   | 6  | RPS9 [BioGRID]      | 14141193  |  |
| 4  | 1 |     | 3   | 4  | STRAP [BioGRID]     | 148727341 |  |
| 16 | 1 |     |     |    | CKAP5 [BioGRID]     | 57164942  |  |
| 4  | 1 | 1   | 1   | 14 | RPS2 [BioGRID]      | 15055539  |  |
| 8  | 1 | 1   |     |    |                     | 195539395 |  |
| 1  | 1 |     | 11  | 3  | CAPRIN1 [BioGRID]   | 42558250  |  |
| 12 | 1 | 1   | 113 |    | EIF3E [BioGRID]     | 4503521   |  |
| 2  | 1 | 1   |     |    | AIMP1 [BioGRID]     | 45006986  |  |
|    | 1 |     |     | 2  | GRSF1 [BioGRID]     | 149193319 |  |
|    | 1 |     |     |    | TBL3 [BioGRID]      | 19913369  |  |
| 1  | 1 |     | 1   | 1  | C14orf166 [BioGRID] | 7706322   |  |
| 2  | 1 |     |     | 3  | CDCSL [BioGRID]     | 11067747  |  |
| 2  | 1 |     | 2   | 6  | RPL30 [BioGRID]     | 4506631   |  |
|    | 1 |     |     |    | CFL2 [BioGRID]      | 14719392  |  |
|    | 1 |     |     |    | ARHGEF10 [BioGRID]  | 62548864  |  |
| 5  | 1 |     | 7   | 1  | LRPPRC [BioGRID]    | 31621305  |  |
| 4  | 1 |     | 3   | 4  | STAU1 [BioGRID]     | 82659083  |  |
| 17 | 1 | 2   |     |    | SPTAN1 [BioGRID]    | 154759259 |  |
| 1  | 1 |     |     |    | PSMD4 [BioGRID]     | 5292161   |  |
| 6  | 1 | 4   | 4   | 9  | SNRPD1 [BioGRID]    | 5902102   |  |
| 17 | 1 | 1   | 2   | 21 | XRCC5 [BioGRID]     | 10863945  |  |
|    | 1 |     |     |    | TBX4 [BioGRID]      | 18129690  |  |
| 5  | 1 |     |     | 2  | EIF5B [BioGRID]     | 84043963  |  |
|    | 1 |     |     |    | CANX [BioGRID]      | 10716563  |  |
| 1  | 1 |     | 3   | 6  | RPL21 [BioGRID]     | 18104948  |  |
|    | 1 |     |     |    | POLR2E [BioGRID]    | 14589951  |  |
| 3  | 1 | 1   |     |    | GDI2 [BioGRID]      | 6598323   |  |
|    | 1 |     |     |    | MAPK6 [BioGRID]     | 4506091   |  |
|    | 1 |     |     |    | ACTL6A [BioGRID]    | 4757718   |  |
| 1  | 1 | 4   | 1   |    | TUBAL3 [BioGRID]    | 13376181  |  |
| 1  | 1 | 2   | 1   | 13 | SNRPD2 [BioGRID]    | 4759158   |  |
| 7  | 1 |     | 5   | 15 | RPL6 [BioGRID]      | 16753227  |  |
| 6  | 1 | 1   |     |    | CCT3 [BioGRID]      | 58761486  |  |
| 3  | 1 |     | 11  | 4  | NONO [BioGRID]      | 34932414  |  |
| 2  | 1 | 7   |     | 1  | HSPD1 [BioGRID]     | 31542947  |  |
|    | 1 |     |     | 1  | NACA [BioGRID]      | 5031931   |  |
|    | 1 | 2   | 2   | 1  | RPS27A [BioGRID]    | 4506713   |  |
|    | 1 |     |     |    | KDM1A [BioGRID]     | 58761546  |  |
|    | 1 |     |     |    | GTF2H4 [BioGRID]    | 4504201   |  |
|    | 1 |     |     |    | RYR1 [BioGRID]      | 113204615 |  |
| 3  | 1 | 6   | 3   | 2  | RPS27 [BioGRID]     | 4506711   |  |
|    | 1 |     |     |    | PTPLAD1 [BioGRID]   | 117168248 |  |
|    | 1 |     |     |    | ARHGEF2 [BioGRID]   | 15011974  |  |
| 5  | 1 |     | 1   | 3  | EIF6 [BioGRID]      | 4504771   |  |
|    | 1 |     |     |    | ALDH3B1 [BioGRID]   | 71773324  |  |
|    | 1 |     |     |    | SF3B5 [BioGRID]     | 13775200  |  |
| 7  | 1 | 1   |     |    | E2F7 [BioGRID]      | 145580626 |  |
| 9  | 1 | 3   | 2   | 3  | MARS [BioGRID]      | 14043022  |  |
| 1  | 1 |     | 2   | 1  | RPS12 [BioGRID]     | 14277700  |  |
| 3  | 1 |     | 13  | 15 | RPS17 [BioGRID]     | 4506693   |  |
|    | 1 |     |     |    | POLR2B [BioGRID]    | 4505941   |  |
| 8  | 1 |     | 1   |    | GEMIN4 [BioGRID]    | 122939157 |  |
|    | 1 | 1   | 1   |    | MYCBP [BioGRID]     | 57242777  |  |
| 3  | 1 | 487 | 2   | 2  | YWHAE [BioGRID]     | 5803225   |  |
| 2  | 1 |     | 13  | 20 | RPS5 [BioGRID]      | 13904870  |  |
|    | 1 |     |     |    | TPH2 [BioGRID]      | 31795563  |  |
|    | 1 |     |     |    | TERF2IP [BioGRID]   | 52627149  |  |
|    | 1 |     |     |    | TNRC6B [BioGRID]    | 148491080 |  |
| 4  | 1 | 1   | 1   |    | DDX20 [BioGRID]     | 14251212  |  |
|    | 1 |     | 3   |    |                     | 218505827 |  |
| 8  | 1 |     |     |    | ERC1 [BioGRID]      | 14149661  |  |
|    | 1 |     |     | 1  | PUF60 [BioGRID]     | 17298690  |  |
| 2  | 1 |     |     |    | HDAC2 [BioGRID]     | 116284376 |  |
| 9  | 1 | 3   | 1   | 44 | PRPF8 [BioGRID]     | 91208426  |  |
| 2  | 1 |     |     |    | DCTN1 [BioGRID]     | 13259508  |  |
|    | 1 | 3   | 1   |    | RPL10P6 [BioGRID]   | 169164494 |  |
| 18 | 1 | 1   |     |    | SPTBN1 [BioGRID]    | 112382250 |  |
| 1  | 1 |     |     |    | SF3A3 [BioGRID]     | 5803167   |  |
|    | 1 |     |     |    | DSG1 [BioGRID]      | 119703744 |  |

|    |   |     |     |     |                     |           |  |
|----|---|-----|-----|-----|---------------------|-----------|--|
| 3  | 1 |     | 1   |     | KARS [BioGRID]      | 5031815   |  |
|    | 1 |     |     |     | HSP90B1 [BioGRID]   | 4507677   |  |
|    | 1 |     |     |     | MIF [BioGRID]       | 4505185   |  |
|    | 1 |     |     | 2   | HIST1H4A [BioGRID]  | 4504301   |  |
|    | 1 |     |     |     | ZNF318 [BioGRID]    | 120587019 |  |
|    |   |     |     |     |                     | 197383062 |  |
| 2  | 1 | 1   | 22  | 29  | CSDA [BioGRID]      | 20070160  |  |
| 19 | 1 |     |     |     | CMBL [BioGRID]      | 20270371  |  |
|    | 1 |     |     |     | DNAH3 [BioGRID]     | 24308169  |  |
|    | 1 | 3   |     |     | LOC389901 [BioGRID] | 169216498 |  |
|    | 1 |     |     |     | COL6A6 [BioGRID]    | 156616290 |  |
| 2  | 1 | 1   | 2   | 19  | RPL14 [BioGRID]     | 78000181  |  |
|    | 1 |     |     |     | MDP1 [BioGRID]      | 33457311  |  |
| 34 |   |     | 1   |     | PRPS2 [BioGRID]     | 4506129   |  |
| 31 |   | 1   |     | 1   | PRPSAP2 [BioGRID]   | 4506133   |  |
| 31 |   | 100 | 2   |     | TUBB2A [BioGRID]    | 4507729   |  |
| 27 |   |     |     |     | PRPS1 [BioGRID]     | 4506127   |  |
| 26 |   | 210 | 5   |     | HSP90AB1 [BioGRID]  | 20149594  |  |
| 23 |   | 4   | 1   |     | DYNC1H1 [BioGRID]   | 33350932  |  |
| 23 |   | 144 |     |     | TUBA1A [BioGRID]    | 17986283  |  |
| 18 |   |     |     |     |                     | 194018537 |  |
| 12 |   | 2   | 35  | 11  | DDX3X [BioGRID]     | 87196351  |  |
| 12 |   | 2   |     | 8   | PRPF19 [BioGRID]    | 7657381   |  |
| 12 |   |     |     |     | KRT6B [BioGRID]     | 119703753 |  |
| 12 |   |     |     |     | ATR [BioGRID]       | 157266317 |  |
| 10 |   | 1   | 101 |     | EIF3L [BioGRID]     | 7705433   |  |
| 10 |   |     | 2   | 26  | PARP1 [BioGRID]     | 156523968 |  |
| 10 |   | 1   |     | 1   | DARS [BioGRID]      | 45439306  |  |
| 10 |   | 158 |     |     | TUBA1B [BioGRID]    | 57013276  |  |
| 9  |   |     | 113 |     | EIF3C [BioGRID]     | 4503525   |  |
| 9  |   | 2   |     |     | CCT6A [BioGRID]     | 4502643   |  |
| 9  |   |     | 1   | 101 | SNRNP200 [BioGRID]  | 40217847  |  |
| 8  |   | 1   |     |     | PSMC3 [BioGRID]     | 21361144  |  |
| 7  |   | 5   | 16  | 37  | SYNCRIP [BioGRID]   | 23397427  |  |
| 7  |   |     | 26  | 4   | GNB2L1 [BioGRID]    | 5174447   |  |
| 7  |   | 1   |     |     | TACC3 [BioGRID]     | 5454102   |  |
| 7  |   | 2   | 15  | 6   | PTBP1 [BioGRID]     | 4506243   |  |
| 7  |   | 2   | 4   | 8   | SNRPN [BioGRID]     | 4507135   |  |
| 6  |   | 1   | 82  |     | EIF3M [BioGRID]     | 23397429  |  |
| 6  |   | 1   | 1   | 2   | CPSF6 [BioGRID]     | 162329583 |  |
| 6  |   | 1   |     |     | PSMD11 [BioGRID]    | 28872725  |  |
| 5  |   | 1   |     | 1   | ACTR1A [BioGRID]    | 5031569   |  |
| 6  |   | 2   | 2   | 2   | KIAA1967 [BioGRID]  | 24432106  |  |
| 5  |   |     |     |     | PSMD2 [BioGRID]     | 25777602  |  |
| 6  |   |     | 43  | 7   | PABPC4 [BioGRID]    | 4504715   |  |
| 5  |   |     | 1   | 2   | DRG1 [BioGRID]      | 4758796   |  |
| 5  |   | 7   |     |     | KRT8 [BioGRID]      | 4504919   |  |
| 5  |   |     | 7   | 14  | IGF2BP1 [BioGRID]   | 56237027  |  |
| 5  |   |     |     |     | KRT5 [BioGRID]      | 119395754 |  |
| 4  |   |     |     |     | PSMC2 [BioGRID]     | 4506209   |  |
| 4  |   | 2   |     | 27  | KPNB1 [BioGRID]     | 19923142  |  |
| 4  |   |     | 141 | 1   | EIF3D [BioGRID]     | 4503523   |  |
| 4  |   |     |     |     | PSMD13 [BioGRID]    | 157502193 |  |
| 4  |   |     |     |     | PSMC4 [BioGRID]     | 5729991   |  |
| 4  |   | 3   | 2   | 2   | NAP1L1 [BioGRID]    | 4758756   |  |
| 4  |   | 1   | 1   |     | QARS [BioGRID]      | 4826960   |  |
| 4  |   | 1   | 392 | 1   | EIF4A1 [BioGRID]    | 4503529   |  |
| 4  |   |     | 46  |     | EIF3K [BioGRID]     | 10801345  |  |
| 4  |   |     |     |     | PSMD14 [BioGRID]    | 5031981   |  |
| 4  |   |     | 11  | 3   | RPS15 [BioGRID]     | 4506687   |  |
| 4  |   |     | 4   | 1   | C22orf28 [BioGRID]  | 7657015   |  |
| 4  |   |     |     |     | HSPA1L [BioGRID]    | 124256496 |  |
| 4  |   |     |     |     | KRT16 [BioGRID]     | 24430192  |  |
| 4  |   | 1   |     | 3   | PPP1CA [BioGRID]    | 4506003   |  |
| 4  |   | 1   | 24  | 33  | RPS3A [BioGRID]     | 4506723   |  |
| 3  |   | 1   |     |     | FASN [BioGRID]      | 41872631  |  |
| 3  |   |     | 17  | 4   | LARP1 [BioGRID]     | 39725634  |  |
| 3  |   |     |     | 1   | PPP1CC [BioGRID]    | 4506007   |  |
| 3  |   |     | 1   | 2   | LUC7L3 [BioGRID]    | 19923485  |  |
| 3  |   |     |     |     | MAP3K7IP1 [BioGRID] | 5174703   |  |
|    |   |     |     |     |                     | 222136639 |  |
| 3  |   |     | 7   | 25  | RPL3 [BioGRID]      | 4506649   |  |
| 3  |   | 5   |     |     | STIP1 [BioGRID]     | 5803181   |  |



|   |  |   |     |    |                    |           |  |
|---|--|---|-----|----|--------------------|-----------|--|
| 3 |  | 1 |     |    | PSMD7 [BioGRID]    | 25777615  |  |
| 3 |  |   |     | 1  | EEF1E1 [BioGRID]   | 4758862   |  |
| 3 |  |   | 5   | 1  | EIF2S3 [BioGRID]   | 4503507   |  |
| 3 |  | 1 | 19  | 16 | RPS24 [BioGRID]    | 4506703   |  |
| 3 |  |   |     |    | FRYL [BioGRID]     | 119874201 |  |
| 3 |  |   |     | 15 | PA2G4 [BioGRID]    | 124494254 |  |
| 3 |  |   | 4   | 9  | RPL13 [BioGRID]    | 15431295  |  |
| 3 |  |   | 5   | 6  | IGF2BP3 [BioGRID]  | 30795212  |  |
| 2 |  | 1 | 1   |    | GEMIN5 [BioGRID]   | 157739942 |  |
| 2 |  | 1 |     |    | PSMD12 [BioGRID]   | 4506221   |  |
| 2 |  |   |     |    | SMC4 [BioGRID]     | 50658063  |  |
| 2 |  |   |     |    | CFL1 [BioGRID]     | 5031635   |  |
| 2 |  |   |     |    | C20orf11 [BioGRID] | 8923557   |  |
| 2 |  | 1 | 1   | 3  | GRWD1 [BioGRID]    | 31542862  |  |
| 2 |  | 7 |     |    | DNAJA2 [BioGRID]   | 5031741   |  |
| 2 |  |   |     |    | EEF2 [BioGRID]     | 4503483   |  |
| 2 |  |   | 1   | 17 | RPL4 [BioGRID]     | 16579885  |  |
| 2 |  | 2 |     |    | PSMD3 [BioGRID]    | 25777612  |  |
| 2 |  | 1 |     | 1  | SF3B14 [BioGRID]   | 7706326   |  |
| 2 |  |   |     | 2  | BCAS2 [BioGRID]    | 5031653   |  |
| 2 |  |   |     |    |                    | 207452735 |  |
| 2 |  |   |     |    | DYNC1I2 [BioGRID]  | 24307879  |  |
| 2 |  |   |     |    | CORO1C [BioGRID]   | 7656991   |  |
| 2 |  |   |     |    | CAPZA1 [BioGRID]   | 5453597   |  |
| 2 |  |   |     |    | ANKFY1 [BioGRID]   | 110815813 |  |
| 2 |  |   |     |    | MYL12A [BioGRID]   | 5453740   |  |
| 2 |  | 1 | 2   | 4  | SERBP1 [BioGRID]   | 66346679  |  |
| 2 |  |   | 2   | 3  | RPS23 [BioGRID]    | 4506701   |  |
| 2 |  |   |     | 3  | C1orf25 [BioGRID]  | 163792194 |  |
| 2 |  |   |     |    | SMC2 [BioGRID]     | 110347418 |  |
| 2 |  |   | 1   |    | EXOSC8 [BioGRID]   | 31415882  |  |
| 2 |  |   |     |    | TXNDC12 [BioGRID]  | 7705696   |  |
| 2 |  | 1 | 2   | 16 | RPL31 [BioGRID]    | 4506633   |  |
| 2 |  |   |     | 5  | RPL18A [BioGRID]   | 114150226 |  |
| 2 |  | 1 | 2   | 3  | CCNA1 [BioGRID]    | 4502611   |  |
| 2 |  |   |     |    | SNRPB2 [BioGRID]   | 4507123   |  |
| 2 |  | 5 | 5   | 19 | HNRNPF [BioGRID]   | 4826760   |  |
| 2 |  | 1 |     |    | SF3B4 [BioGRID]    | 5032069   |  |
| 2 |  |   |     | 13 | RPL37A [BioGRID]   | 4506643   |  |
| 2 |  | 5 |     | 1  | ATP5B [BioGRID]    | 32189394  |  |
| 1 |  | 1 | 6   | 7  | RPL24 [BioGRID]    | 4506619   |  |
| 1 |  | 3 | 2   | 1  | TXN [BioGRID]      | 50592994  |  |
| 1 |  |   | 1   | 1  | SNRNP70 [BioGRID]  | 29568103  |  |
| 1 |  |   | 5   |    | DDX1 [BioGRID]     | 4826686   |  |
| 1 |  |   |     | 1  | SLAIN2 [BioGRID]   | 149588928 |  |
| 1 |  |   |     |    | RNF219 [BioGRID]   | 88759348  |  |
| 1 |  |   |     | 1  | TSR1 [BioGRID]     | 39780588  |  |
| 1 |  | 1 |     |    | PDHB [BioGRID]     | 156564403 |  |
| 1 |  |   |     |    | PSMD1 [BioGRID]    | 25777600  |  |
| 1 |  | 1 |     |    | PSMB1 [BioGRID]    | 4506193   |  |
| 1 |  |   |     |    | GCN1L1 [BioGRID]   | 54607053  |  |
| 1 |  |   |     | 2  | ZRANB2 [BioGRID]   | 42741682  |  |
| 1 |  |   |     |    | UNC45A [BioGRID]   | 29725607  |  |
| 1 |  |   | 1   | 1  | MSI2 [BioGRID]     | 20373175  |  |
| 1 |  |   |     | 1  | KIF2A [BioGRID]    | 148612849 |  |
| 1 |  |   | 1   | 2  | LUC7L2 [BioGRID]   | 116812577 |  |
| 1 |  |   |     | 2  | USP15 [BioGRID]    | 14149627  |  |
| 1 |  | 1 | 1   |    | AKAP8 [BioGRID]    | 5031579   |  |
| 1 |  |   |     | 1  | SMN1 [BioGRID]     | 4507091   |  |
| 1 |  |   | 13  |    | ASCC3 [BioGRID]    | 76880486  |  |
| 1 |  |   |     |    | DIABLO [BioGRID]   | 9845297   |  |
| 1 |  | 1 |     |    | RUVBL2 [BioGRID]   | 5730023   |  |
| 1 |  | 1 |     | 11 | SNRPG [BioGRID]    | 4507133   |  |
| 1 |  |   |     |    | MYL6 [BioGRID]     | 17986258  |  |
| 1 |  |   | 1   |    | RBM3 [BioGRID]     | 5803137   |  |
| 1 |  |   |     | 1  | NSUN2 [BioGRID]    | 39995082  |  |
| 1 |  |   |     | 3  | CMAS [BioGRID]     | 8923900   |  |
| 1 |  |   |     |    | EIF2B1 [BioGRID]   | 4503503   |  |
| 1 |  |   |     |    | HOMER1 [BioGRID]   | 4759198   |  |
| 1 |  |   | 2   |    |                    | 222352151 |  |
| 1 |  |   | 3   | 5  | CIRBP [BioGRID]    | 4502847   |  |
| 1 |  |   | 22  | 9  | G3BP1 [BioGRID]    | 5031703   |  |
| 1 |  |   | 205 |    | EIF4G1 [BioGRID]   | 38201619  |  |

|   |  |     |    |    |                        |           |  |
|---|--|-----|----|----|------------------------|-----------|--|
| 1 |  |     |    |    | NMT1 [BioGRID]         | 10835073  |  |
| 1 |  |     |    |    | GTF3C4 [BioGRID]       | 156119605 |  |
| 1 |  | 197 |    |    | YWHAB [BioGRID]        | 4507949   |  |
| 1 |  |     |    |    | AIMP2 [BioGRID]        | 11125770  |  |
| 1 |  |     |    |    | NCAPD3 [BioGRID]       | 45356151  |  |
| 1 |  |     |    |    | DPY30 [BioGRID]        | 14211889  |  |
| 1 |  |     |    |    | NASP [BioGRID]         | 27262628  |  |
| 1 |  | 1   | 18 | 16 | RPS7 [BioGRID]         | 4506741   |  |
| 1 |  |     |    |    | OGT [BioGRID]          | 32307148  |  |
| 1 |  |     |    |    | C21orf45 [BioGRID]     | 9506437   |  |
| 1 |  |     |    |    | PSMA1 [BioGRID]        | 4506179   |  |
| 1 |  |     | 3  | 2  | U2AF2 [BioGRID]        | 6005926   |  |
| 1 |  |     |    |    | OTUD4 [BioGRID]        | 40807496  |  |
| 1 |  |     |    |    |                        | 212276070 |  |
| 1 |  |     |    |    | HDLBP [BioGRID]        | 4885409   |  |
| 1 |  |     |    |    | CCDC124 [BioGRID]      | 19923969  |  |
| 1 |  |     |    |    | SFRS11 [BioGRID]       | 4759100   |  |
| 1 |  |     |    | 1  | RPL36P8 [BioGRID]      | 88976416  |  |
| 1 |  |     |    |    | RPL38 [BioGRID]        | 4506645   |  |
| 1 |  |     |    | 4  | RPL27A [BioGRID]       | 4506625   |  |
| 1 |  |     | 1  |    | NCBP1 [BioGRID]        | 4505343   |  |
| 1 |  |     |    |    | SIP1 [BioGRID]         | 4506961   |  |
| 1 |  |     | 1  | 1  | THOC4 [BioGRID]        | 55770864  |  |
| 1 |  |     |    |    | ZC3H15 [BioGRID]       | 118150660 |  |
| 1 |  |     |    | 1  | PSMB4 [BioGRID]        | 22538467  |  |
| 1 |  |     |    |    | PHB2 [BioGRID]         | 6005854   |  |
| 1 |  |     |    | 6  | ADAR [BioGRID]         | 70166852  |  |
| 1 |  |     |    |    | NCAPG [BioGRID]        | 21359945  |  |
| 1 |  |     |    |    | COPB2 [BioGRID]        | 4758032   |  |
| 1 |  |     | 1  | 3  | MRPL12 [BioGRID]       | 27436901  |  |
| 1 |  |     |    | 14 | MYBBP1A [BioGRID]      | 157694492 |  |
| 1 |  |     |    |    | TCOF1 [BioGRID]        | 57164975  |  |
| 1 |  |     |    |    | RFC5 [BioGRID]         | 6677723   |  |
| 1 |  |     |    |    | WAPAL [BioGRID]        | 42734325  |  |
| 1 |  |     |    |    | ZYX [BioGRID]          | 4508047   |  |
| 1 |  |     |    |    | AP2B1 [BioGRID]        | 4557469   |  |
| 1 |  |     |    |    | CETN2 [BioGRID]        | 4757902   |  |
| 1 |  | 30  |    |    | CDC37 [BioGRID]        | 5901922   |  |
| 1 |  |     |    |    | MYH9 [BioGRID]         | 12667788  |  |
| 1 |  |     | 3  |    | HNRNPC [BioGRID]       | 117189975 |  |
| 1 |  |     |    | 4  | C7orf50 [BioGRID]      | 14150149  |  |
| 1 |  |     |    | 11 | SNRPF [BioGRID]        | 4507131   |  |
| 1 |  |     | 1  | 16 | USP39 [BioGRID]        | 56550051  |  |
| 1 |  |     |    |    | WDR26 [BioGRID]        | 55743153  |  |
| 1 |  |     |    |    | ARL6IP4 [BioGRID]      | 50409691  |  |
| 1 |  |     |    |    | BTF3 [BioGRID]         | 20070130  |  |
| 1 |  |     |    |    | LRRK1 [BioGRID]        | 90991702  |  |
| 1 |  |     |    |    | CNOT7 [BioGRID]        | 85067505  |  |
| 1 |  |     | 9  | 1  | SFPQ [BioGRID]         | 4826998   |  |
| 1 |  |     |    | 2  | RFC4 [BioGRID]         | 4506491   |  |
| 1 |  |     |    |    | CCDC25 [BioGRID]       | 108936950 |  |
| 1 |  |     |    |    | NKRF [BioGRID]         | 63003897  |  |
| 1 |  |     | 13 | 7  | FUS [BioGRID]          | 4826734   |  |
| 1 |  |     | 1  | 4  | ABCF1 [BioGRID]        | 10947135  |  |
| 1 |  |     |    |    | ADD1 [BioGRID]         | 29826319  |  |
| 1 |  |     |    |    | PSMA6 [BioGRID]        | 23110944  |  |
| 1 |  |     |    |    | CSTB [BioGRID]         | 4503117   |  |
| 1 |  |     |    |    | LAMA2 [BioGRID]        | 28559088  |  |
| 1 |  |     | 3  |    | SKP1 [BioGRID]         | 25777711  |  |
| 1 |  | 2   |    |    | BAG2 [BioGRID]         | 4757834   |  |
| 1 |  |     |    |    | ZBTB24 [BioGRID]       | 7662128   |  |
| 1 |  |     |    | 1  | WDR61 [BioGRID]        | 13376840  |  |
| 1 |  |     |    |    | SNRPA [BioGRID]        | 4759156   |  |
| 1 |  |     |    |    | KPNA4 [BioGRID]        | 4504901   |  |
| 1 |  |     |    | 5  | PDCD11 [BioGRID]       | 70980549  |  |
| 1 |  |     |    |    | CSE1L [BioGRID]        | 29029559  |  |
| 1 |  |     |    |    | STRBP [BioGRID]        | 21361745  |  |
| 1 |  |     |    |    | PSMD10 [BioGRID]       | 4506217   |  |
| 1 |  |     | 79 |    | EIF3I [BioGRID]        | 4503513   |  |
| 1 |  |     |    |    | PSMB5 [BioGRID]        | 4506201   |  |
| 1 |  |     |    |    | RANBP2 [BioGRID]       | 150418007 |  |
| 1 |  |     |    |    | LOC100130283 [BioGRID] | 169210373 |  |
| 1 |  |     |    |    | CAP1 [BioGRID]         | 5453595   |  |

|   |  |     |    |                         |           |   |
|---|--|-----|----|-------------------------|-----------|---|
| 1 |  |     |    | PSMB7 [BioGRID]         | 4506203   |   |
| 1 |  |     |    | TMEM188 [BioGRID]       | 31542781  |   |
| 1 |  |     |    | ACTBL2 [BioGRID]        | 63055057  |   |
| 1 |  |     |    | TMOD2 [BioGRID]         | 7657647   |   |
|   |  | 353 |    | RAF1 [BioGRID]          | 4506401   |   |
|   |  | 240 |    | TUBB2B [BioGRID]        | 29788768  |   |
|   |  | 236 | 13 | TUBB4 [BioGRID]         | 21361322  |   |
|   |  | 221 |    | YWHAZ [BioGRID]         | 4507953   |   |
|   |  | 210 |    | TUBB3 [BioGRID]         | 50592996  |   |
|   |  | 191 |    | TUBB6 [BioGRID]         | 14210536  |   |
|   |  | 170 |    | YWHAG [BioGRID]         | 21464101  |   |
|   |  | 168 |    | YWHAQ [BioGRID]         | 5803227   |   |
|   |  | 166 |    | YWHAH [BioGRID]         | 4507951   |   |
|   |  | 131 |    | RP11-631M21.2 [BioGRID] | 42558279  |   |
|   |  | 52  |    | NRAS [BioGRID]          | 4505451   |   |
|   |  | 36  |    | FKBP5 [BioGRID]         | 4758384   |   |
|   |  | 30  |    | KRAS [BioGRID]          | 15718761  |   |
|   |  | 23  |    | TIMM50 [BioGRID]        | 48526509  |   |
|   |  | 20  |    | KRT19 [BioGRID]         | 24234699  |   |
|   |  | 17  |    | AIFM1 [BioGRID]         | 4757732   |   |
|   |  | 11  |    | DIS3L [BioGRID]         | 19115966  |   |
|   |  | 7   |    | TIMM13 [BioGRID]        | 11024700  |   |
|   |  | 6   |    | AKAP8L [BioGRID]        | 49472841  |   |
|   |  | 5   |    | CAD [BioGRID]           | 18105007  |   |
|   |  | 5   |    | RCN1 [BioGRID]          | 4506455   |   |
|   |  | 5   |    | SEH1L [BioGRID]         | 61743969  |   |
|   |  | 4   |    | ATP1A1 [BioGRID]        | 21361181  |   |
|   |  | 4   |    |                         | 205360838 |   |
|   |  | 4   |    | ATP2A2 [BioGRID]        | 4502285   |   |
|   |  | 4   |    | HAX1 [BioGRID]          | 13435356  |   |
|   |  | 4   |    | STUB1 [BioGRID]         | 56181387  |   |
|   |  | 3   |    | CLPB [BioGRID]          | 13540606  |   |
|   |  | 3   |    |                         | 223278387 |   |
|   |  | 3   |    | ALDH3A2 [BioGRID]       | 4557303   |   |
|   |  | 3   |    | KRT18 [BioGRID]         | 4557888   |   |
|   |  | 3   |    | MLLT11 [BioGRID]        | 5802968   |   |
|   |  | 3   |    | RAP1A [BioGRID]         | 4506413   |   |
|   |  | 2   | 1  | HLA-C [BioGRID]         | 52630342  |   |
|   |  | 2   |    | FKBP8 [BioGRID]         | 52630440  |   |
|   |  | 2   |    | SEC16A [BioGRID]        | 124378039 |   |
|   |  | 2   |    |                         | 197927448 |   |
|   |  | 2   |    | GRAMD1A [BioGRID]       | 92110010  |   |
|   |  | 2   |    | EMD [BioGRID]           | 4557553   |   |
|   |  | 2   |    | LGALS3BP [BioGRID]      | 5031863   |   |
|   |  | 2   |    | MAD2L1 [BioGRID]        | 4505067   |   |
|   |  | 2   |    | ARL1 [BioGRID]          | 4502227   |   |
|   |  | 2   |    | SLC25A3 [BioGRID]       | 4505775   |   |
|   |  | 2   |    | DNAJC2 [BioGRID]        | 94538370  |   |
|   |  | 2   |    | CHCHD4 [BioGRID]        | 21389469  |   |
|   |  | 2   |    |                         | 217272887 |   |
|   |  | 2   |    | CALU [BioGRID]          | 4502551   |   |
|   |  | 2   |    | TMX3 [BioGRID]          | 38505222  |   |
|   |  | 2   |    | FDFT1 [BioGRID]         | 67089147  |   |
|   |  | 1   |    | ASPH [BioGRID]          | 9910364   |   |
|   |  | 1   |    | NME2 [BioGRID]          | 4505409   |   |
|   |  | 1   |    | IPO8 [BioGRID]          | 53759103  |   |
|   |  | 1   |    | GLUD1 [BioGRID]         | 4885281   |   |
|   |  | 1   |    | SDF4 [BioGRID]          | 7706573   |   |
|   |  | 1   |    | PPT1 [BioGRID]          | 4506031   |   |
|   |  | 1   |    | FBL [BioGRID]           | 12056465  |   |
|   |  | 1   |    | ESYT1 [BioGRID]         | 14149680  |   |
|   |  | 1   |    | ARF1 [BioGRID]          | 4502201   |   |
|   |  | 1   |    | MYL6B [BioGRID]         | 4505303   |   |
|   |  | 1   |    | TRIM41 [BioGRID]        | 42516572  |   |
|   |  | 1   |    | AK2 [BioGRID]           | 4502013   |   |
|   |  | 1   |    | DCHS1 [BioGRID]         | 16933557  |   |
|   |  | 1   |    |                         | 194306640 |   |
|   |  | 1   |    | MRPS22 [BioGRID]        | 9910244   |   |
|   |  | 1   | 6  | TRA2B [BioGRID]         | 4759098   | 1 |
|   |  | 1   |    | MYO3B [BioGRID]         | 134288892 |   |
|   |  | 1   |    | ESYT2 [BioGRID]         | 45387945  |   |
|   |  | 1   |    | HR [BioGRID]            | 22547204  |   |
|   |  | 1   |    | CNOT1 [BioGRID]         | 42716275  |   |

|  |  |   |     |    |                        |           |  |
|--|--|---|-----|----|------------------------|-----------|--|
|  |  | 1 |     |    | PCDH7 [BioGRID]        | 14589931  |  |
|  |  | 1 |     |    | RAB1A [BioGRID]        | 4758988   |  |
|  |  | 1 |     |    | DCAF7 [BioGRID]        | 108936958 |  |
|  |  | 1 |     |    | SLC25A25 [BioGRID]     | 56699401  |  |
|  |  | 1 |     |    | ZNF507 [BioGRID]       | 55925468  |  |
|  |  | 1 |     |    | CCNB3 [BioGRID]        | 90669307  |  |
|  |  | 1 |     |    | DNAH8 [BioGRID]        | 126012497 |  |
|  |  | 1 |     |    | SLC25A5 [BioGRID]      | 156071459 |  |
|  |  | 1 |     |    | FAR1 [BioGRID]         | 24308324  |  |
|  |  | 1 |     |    | BAG5 [BioGRID]         | 6631077   |  |
|  |  | 1 |     |    | SRP19 [BioGRID]        | 4507213   |  |
|  |  | 1 |     |    | TCEB1 [BioGRID]        | 5032161   |  |
|  |  | 1 |     |    | RRAS [BioGRID]         | 5454028   |  |
|  |  | 1 |     |    | SLC39A7 [BioGRID]      | 117553608 |  |
|  |  | 1 |     |    | SEC22B [BioGRID]       | 94429050  |  |
|  |  | 1 |     |    | CDIPT [BioGRID]        | 5453906   |  |
|  |  | 1 |     |    | ROCK1 [BioGRID]        | 4885583   |  |
|  |  | 1 | 4   | 9  | HIST1H2BG [BioGRID]    | 4504257   |  |
|  |  | 1 |     |    | CKMT1B [BioGRID]       | 10334859  |  |
|  |  | 1 | 2   | 1  | YTHDF2 [BioGRID]       | 116812575 |  |
|  |  | 1 |     |    | FARSA [BioGRID]        | 4758340   |  |
|  |  | 1 |     |    | GLA [BioGRID]          | 4504009   |  |
|  |  | 1 |     |    | DBT [BioGRID]          | 110671329 |  |
|  |  | 1 |     |    | PTGES3 [BioGRID]       | 23308579  |  |
|  |  | 1 |     |    | NDUFS3 [BioGRID]       | 4758788   |  |
|  |  | 1 |     |    | KIAA0913 [BioGRID]     | 122114658 |  |
|  |  | 1 |     |    | TPP1 [BioGRID]         | 5729770   |  |
|  |  | 1 | 1   |    | MSI1 [BioGRID]         | 4505255   |  |
|  |  | 1 |     |    | BCL11B [BioGRID]       | 12597635  |  |
|  |  | 1 |     |    | FANCD2 [BioGRID]       | 21361861  |  |
|  |  | 1 |     |    | RUVBL1 [BioGRID]       | 4506753   |  |
|  |  | 1 |     |    | SAR1B [BioGRID]        | 7705827   |  |
|  |  | 1 |     |    | DDOST [BioGRID]        | 20070197  |  |
|  |  | 1 | 1   |    | TARDBP [BioGRID]       | 6678271   |  |
|  |  | 1 |     |    | CTSB [BioGRID]         | 4503139   |  |
|  |  | 1 |     |    | MET [BioGRID]          | 42741655  |  |
|  |  | 1 |     |    | THOC3 [BioGRID]        | 14150171  |  |
|  |  | 1 |     |    | PITRM1 [BioGRID]       | 41352061  |  |
|  |  | 1 | 6   | 9  | SFRS1 [BioGRID]        | 5902076   |  |
|  |  | 1 |     |    | QPCTL [BioGRID]        | 92110027  |  |
|  |  | 1 |     | 2  | RPL35A [BioGRID]       | 16117791  |  |
|  |  | 1 |     |    | TUFM [BioGRID]         | 34147630  |  |
|  |  | 1 |     |    | ATP1B3 [BioGRID]       | 4502281   |  |
|  |  | 1 |     |    | SCN1B [BioGRID]        | 4506805   |  |
|  |  | 1 |     |    | PKD1L2 [BioGRID]       | 116006953 |  |
|  |  | 1 |     |    | KIAA1274 [BioGRID]     | 166235184 |  |
|  |  | 1 |     |    | FANCI [BioGRID]        | 82830440  |  |
|  |  | 1 |     |    | C1orf57 [BioGRID]      | 14150100  |  |
|  |  | 1 |     |    |                        | 218777837 |  |
|  |  | 1 | 4   |    | MATR3 [BioGRID]        | 21626466  |  |
|  |  | 1 |     |    | CAND2 [BioGRID]        | 112420977 |  |
|  |  | 1 |     |    | FAM92A2 [BioGRID]      | 169208597 |  |
|  |  | 1 |     |    | HAUS5 [BioGRID]        | 149944680 |  |
|  |  | 1 |     |    | NT5DC2 [BioGRID]       | 12597653  |  |
|  |  | 1 |     |    | ADCK4 [BioGRID]        | 27363457  |  |
|  |  | 1 |     |    | XPO1 [BioGRID]         | 4507943   |  |
|  |  | 1 |     |    | C6orf201 [BioGRID]     | 145966784 |  |
|  |  | 1 | 1   | 3  | LRRC59 [BioGRID]       | 40254924  |  |
|  |  | 1 |     |    | PPP2CA [BioGRID]       | 4506017   |  |
|  |  |   | 709 |    | EIF4A2 [BioGRID]       | 83700235  |  |
|  |  |   | 76  |    | EIF4G3 [BioGRID]       | 10092601  |  |
|  |  |   | 65  |    | PDCD4 [BioGRID]        | 21735596  |  |
|  |  |   | 61  |    | EIF4G2 [BioGRID]       | 4503539   |  |
|  |  |   | 32  |    | EIF3J [BioGRID]        | 83281438  |  |
|  |  |   | 29  |    | EIF4A3 [BioGRID]       | 7661920   |  |
|  |  |   | 26  |    | BAT2 [BioGRID]         | 149158690 |  |
|  |  |   | 23  |    | LOC100131720 [BioGRID] | 169188690 |  |
|  |  |   | 21  |    | CSNK2A1 [BioGRID]      | 4503095   |  |
|  |  |   | 20  |    | BAT2L2 [BioGRID]       | 115298682 |  |
|  |  |   | 13  |    | BAT2L1 [BioGRID]       | 149192855 |  |
|  |  |   | 12  | 8  | RPS2P5 [BioGRID]       | 169204454 |  |
|  |  |   | 12  | 12 | RPS13 [BioGRID]        | 4506685   |  |
|  |  |   | 10  |    | IGF2BP2 [BioGRID]      | 56118219  |  |

|  |  |    |    |                     |           |  |
|--|--|----|----|---------------------|-----------|--|
|  |  | 10 |    | G3BP2 [BioGRID]     | 19923399  |  |
|  |  | 9  |    | DDX6 [BioGRID]      | 164664518 |  |
|  |  | 9  |    | SFRS7 [BioGRID]     | 72534660  |  |
|  |  | 8  |    | NUFIP2 [BioGRID]    | 32698730  |  |
|  |  | 8  |    | C10orf137 [BioGRID] | 31742484  |  |
|  |  | 8  |    | ASCC2 [BioGRID]     | 20270253  |  |
|  |  | 7  |    | ABCE1 [BioGRID]     | 108773782 |  |
|  |  | 7  | 8  | SFRS3 [BioGRID]     | 4506901   |  |
|  |  | 6  |    | EID2 [BioGRID]      | 63175652  |  |
|  |  | 6  | 1  | SRRM2 [BioGRID]     | 118572613 |  |
|  |  | 6  |    | TAF15 [BioGRID]     | 4507353   |  |
|  |  | 6  |    | HNRNPH2 [BioGRID]   | 9624998   |  |
|  |  | 5  |    | LSM12 [BioGRID]     | 22748747  |  |
|  |  | 5  |    | UPF1 [BioGRID]      | 18375673  |  |
|  |  | 5  |    | DHX29 [BioGRID]     | 67782362  |  |
|  |  | 4  | 3  | RPS11 [BioGRID]     | 4506681   |  |
|  |  | 4  |    | GATAD2B [BioGRID]   | 21218438  |  |
|  |  | 4  |    | ATXN2L [BioGRID]    | 27262645  |  |
|  |  | 4  |    | CDV3 [BioGRID]      | 8923710   |  |
|  |  | 4  |    | ATXN2 [BioGRID]     | 171543895 |  |
|  |  | 4  |    | CSNK2A2 [BioGRID]   | 4503097   |  |
|  |  | 4  |    | ELAVL1 [BioGRID]    | 38201714  |  |
|  |  | 4  |    | SFRS13A [BioGRID]   | 5730079   |  |
|  |  | 4  |    | EIF1B [BioGRID]     | 5031711   |  |
|  |  | 4  |    | FXR2 [BioGRID]      | 4758410   |  |
|  |  | 4  |    | LARP4 [BioGRID]     | 40353736  |  |
|  |  | 4  |    | EIF4E [BioGRID]     | 4503535   |  |
|  |  | 4  |    | CSNK2B [BioGRID]    | 23503295  |  |
|  |  | 3  |    | OBSL1 [BioGRID]     | 144226847 |  |
|  |  | 3  |    | LGTN [BioGRID]      | 56699485  |  |
|  |  | 3  | 4  | DHX30 [BioGRID]     | 20336290  |  |
|  |  | 3  | 3  | RBMXL1 [BioGRID]    | 21361809  |  |
|  |  | 3  | 6  | EWSR1 [BioGRID]     | 4885225   |  |
|  |  | 3  |    | USP10 [BioGRID]     | 119220605 |  |
|  |  | 2  |    | RBM14 [BioGRID]     | 5454064   |  |
|  |  | 2  | 11 | RPS20 [BioGRID]     | 4506697   |  |
|  |  | 2  |    | MACF1 [BioGRID]     | 33188443  |  |
|  |  | 2  |    | FAM98A [BioGRID]    | 56699482  |  |
|  |  | 2  |    | FAM134B [BioGRID]   | 77917617  |  |
|  |  | 2  |    | CLTCL1 [BioGRID]    | 108860681 |  |
|  |  | 2  |    | PLEKHH1 [BioGRID]   | 55741447  |  |
|  |  | 2  |    | TLE3 [BioGRID]      | 157384982 |  |
|  |  | 2  |    | LARP4B [BioGRID]    | 57634536  |  |
|  |  | 2  | 1  | PCBP2 [BioGRID]     | 14141166  |  |
|  |  | 2  |    | DAZAP1 [BioGRID]    | 25470886  |  |
|  |  | 2  | 4  | PURA [BioGRID]      | 5032007   |  |
|  |  | 2  |    | ASCC1 [BioGRID]     | 56676391  |  |
|  |  | 2  |    | KHDRBS1 [BioGRID]   | 5730027   |  |
|  |  | 2  |    | DDX49 [BioGRID]     | 31542656  |  |
|  |  | 2  |    | PAIP1 [BioGRID]     | 17511255  |  |
|  |  | 2  |    | PAIP2 [BioGRID]     | 75677349  |  |
|  |  | 2  | 1  | PURB [BioGRID]      | 15147219  |  |
|  |  | 2  |    | DDX50 [BioGRID]     | 13129006  |  |
|  |  | 2  | 6  | HIST1H2AI [BioGRID] | 4504239   |  |
|  |  | 2  |    | ZCCHC3 [BioGRID]    | 29648305  |  |
|  |  | 2  | 5  | SFRS6 [BioGRID]     | 20127499  |  |
|  |  | 2  |    | RPS7P10 [BioGRID]   | 169205846 |  |
|  |  | 2  |    | SMO [BioGRID]       | 5032099   |  |
|  |  | 2  | 26 | RPL13A [BioGRID]    | 6912634   |  |
|  |  | 2  |    | U2AF1 [BioGRID]     | 5803207   |  |
|  |  | 1  |    | PAIP2B [BioGRID]    | 148235699 |  |
|  |  | 1  | 18 | RPS26 [BioGRID]     | 15011936  |  |
|  |  | 1  | 1  | PABPN1 [BioGRID]    | 4758876   |  |
|  |  | 1  |    | FXR1 [BioGRID]      | 61835148  |  |
|  |  | 1  |    | RBMS3 [BioGRID]     | 51317351  |  |
|  |  | 1  |    | TAGAP [BioGRID]     | 21314774  |  |
|  |  | 1  |    | LARGE [BioGRID]     | 4758664   |  |
|  |  | 1  |    | TRPC1 [BioGRID]     | 4507685   |  |
|  |  | 1  |    | RPL29 [BioGRID]     | 4506629   |  |
|  |  | 1  |    | RBM9 [BioGRID]      | 133925803 |  |
|  |  | 1  |    | NALCN [BioGRID]     | 24119274  |  |
|  |  | 1  |    | RALGAPA1 [BioGRID]  | 51226124  |  |
|  |  | 1  |    | RPL6P19 [BioGRID]   | 169171527 |  |

|  |  |   |     |                        |           |  |
|--|--|---|-----|------------------------|-----------|--|
|  |  | 1 |     | GULP1 [BioGRID]        | 7705318   |  |
|  |  | † | 32  | RPL35 [BioGRID]        | 6005860   |  |
|  |  | 1 |     | POU5F1 [BioGRID]       | 42560248  |  |
|  |  | 1 |     | PYCR2 [BioGRID]        | 21361454  |  |
|  |  | 1 |     | FAM195A [BioGRID]      | 33300670  |  |
|  |  | † | 3   | RPL26 [BioGRID]        | 4506621   |  |
|  |  | † |     | AP2A1 [BioGRID]        | 19913414  |  |
|  |  | 1 |     | KCTD5 [BioGRID]        | 9506651   |  |
|  |  | 1 |     | TRIP4 [BioGRID]        | 32189376  |  |
|  |  | 1 |     | HADHA [BioGRID]        | 20127408  |  |
|  |  | † |     | UBAP2L [BioGRID]       | 188497756 |  |
|  |  | 1 |     | FUBP3 [BioGRID]        | 100816392 |  |
|  |  | 1 | 1   | TRA2A [BioGRID]        | 9558733   |  |
|  |  | 1 | 1   | SFRS9 [BioGRID]        | 4506903   |  |
|  |  | † |     | PUM1 [BioGRID]         | 13491166  |  |
|  |  | † |     | BTRC [BioGRID]         | 4502477   |  |
|  |  | 1 | 5   | SFRS4 [BioGRID]        | 21361282  |  |
|  |  | † |     | FAM195B [BioGRID]      | 126722894 |  |
|  |  | 1 |     | PTCH1 [BioGRID]        | 134254432 |  |
|  |  | 1 |     | FAU [BioGRID]          | 4503659   |  |
|  |  | 1 | 2   | POLDIP2 [BioGRID]      | 7661672   |  |
|  |  | † | †   | BAT1 [BioGRID]         | 4758112   |  |
|  |  | † |     | YTHDF1 [BioGRID]       | 31377750  |  |
|  |  | 1 |     | CAPS2 [BioGRID]        | 166795238 |  |
|  |  | 1 |     |                        | 209862881 |  |
|  |  | 1 |     | SOS2 [BioGRID]         | 154689780 |  |
|  |  | 1 |     | SMCHD1 [BioGRID]       | 148839305 |  |
|  |  | † | 24  | RPL8 [BioGRID]         | 4506663   |  |
|  |  | 1 |     | ELP3 [BioGRID]         | 23510283  |  |
|  |  | † |     | XPO7 [BioGRID]         | 154448892 |  |
|  |  | † |     | RPS6KA2 [BioGRID]      | 19923570  |  |
|  |  | † |     | PTGFR [BioGRID]        | 4506261   |  |
|  |  | † |     | LOC100129791 [BioGRID] | 169167619 |  |
|  |  | 1 |     | HELZ [BioGRID]         | 54792138  |  |
|  |  |   | 242 | SART3 [BioGRID]        | 7661952   |  |
|  |  |   | 184 | MEPCE [BioGRID]        | 47271406  |  |
|  |  |   | 176 | LARP7 [BioGRID]        | 109809739 |  |
|  |  |   | 49  | LSM8 [BioGRID]         | 7706425   |  |
|  |  |   | 35  | PRPF4 [BioGRID]        | 24431950  |  |
|  |  |   | 34  | ENDOG [BioGRID]        | 53759134  |  |
|  |  |   | 32  | PRPF3 [BioGRID]        | 4758556   |  |
|  |  |   | 28  | SART1 [BioGRID]        | 10863889  |  |
|  |  |   | 24  | RPL7P23 [BioGRID]      | 88988289  |  |
|  |  |   | 22  | PPIH [BioGRID]         | 5454154   |  |
|  |  |   | 17  | LSM4 [BioGRID]         | 6912486   |  |
|  |  |   | 16  | CDK9 [BioGRID]         | 4502747   |  |
|  |  |   | 16  | METT10D [BioGRID]      | 122114654 |  |
|  |  |   | 15  | CCNT1 [BioGRID]        | 17978466  |  |
|  |  |   | 13  | PRPF6 [BioGRID]        | 40807485  |  |
|  |  |   | 12  | HEXIM1 [BioGRID]       | 5453682   |  |
|  |  |   | 12  | HNRNPUL1 [BioGRID]     | 21536320  |  |
|  |  |   | 9   | SNRNP40 [BioGRID]      | 115298668 |  |
|  |  |   | 9   | LSM2 [BioGRID]         | 10863977  |  |
|  |  |   | 8   | RRP1B [BioGRID]        | 57863269  |  |
|  |  |   | 7   | H1FX [BioGRID]         | 5174449   |  |
|  |  |   | 7   | RPL27 [BioGRID]        | 4506623   |  |
|  |  |   | 7   | LSM6 [BioGRID]         | 5901998   |  |
|  |  |   | 7   | NOP2 [BioGRID]         | 76150623  |  |
|  |  |   | 7   | TXNL4A [BioGRID]       | 5729802   |  |
|  |  |   | 6   | LSM7 [BioGRID]         | 7706423   |  |
|  |  |   | 6   | CCNT2 [BioGRID]        | 4502629   |  |
|  |  |   | 6   | AFF4 [BioGRID]         | 7656879   |  |
|  |  |   | 6   | HP1BP3 [BioGRID]       | 56676330  |  |
|  |  |   | 6   | DDX18 [BioGRID]        | 38327634  |  |
|  |  |   | 6   | ZNF511 [BioGRID]       | 28274701  |  |
|  |  |   | 5   | LSM5 [BioGRID]         | 6912488   |  |
|  |  |   | 5   | NHP2L1 [BioGRID]       | 4826860   |  |
|  |  |   | 5   | MKI67 [BioGRID]        | 103472005 |  |
|  |  |   | 5   | EBNA1BP2 [BioGRID]     | 5803111   |  |
|  |  |   | 5   | SNRNP27 [BioGRID]      | 24307919  |  |
|  |  |   | 5   | TLN2 [BioGRID]         | 156938343 |  |
|  |  |   | 4   | RSL1D1 [BioGRID]       | 118498359 |  |
|  |  |   | 4   | LSM3 [BioGRID]         | 7657315   |  |

|  |  |  |   |                    |           |  |
|--|--|--|---|--------------------|-----------|--|
|  |  |  | 4 | SRPK1 [BioGRID]    | 47419936  |  |
|  |  |  | 4 | KPNA3 [BioGRID]    | 34485722  |  |
|  |  |  | 4 | RBM39 [BioGRID]    | 4757926   |  |
|  |  |  | 4 | CDK12 [BioGRID]    | 157817023 |  |
|  |  |  | 4 | DDX56 [BioGRID]    | 9506931   |  |
|  |  |  | 3 | PRPF4B [BioGRID]   | 89276756  |  |
|  |  |  | 3 | PPAN [BioGRID]     | 47174861  |  |
|  |  |  | 3 |                    | 194097365 |  |
|  |  |  | 3 | YTHDC2 [BioGRID]   | 38505213  |  |
|  |  |  | 3 | RBM42 [BioGRID]    | 21359951  |  |
|  |  |  | 3 | CD2BP2 [BioGRID]   | 5174409   |  |
|  |  |  | 3 | TUT1 [BioGRID]     | 12383074  |  |
|  |  |  | 3 | PWP1 [BioGRID]     | 5902034   |  |
|  |  |  | 3 | POPDC2 [BioGRID]   | 22209004  |  |
|  |  |  | 3 | TRMU [BioGRID]     | 31542641  |  |
|  |  |  | 3 | GLB1 [BioGRID]     | 119372308 |  |
|  |  |  | 3 | ZC3HAV1 [BioGRID]  | 27477138  |  |
|  |  |  | 3 | ZFR [BioGRID]      | 34101286  |  |
|  |  |  | 3 | RPL34 [BioGRID]    | 16117787  |  |
|  |  |  | 3 | TPM3 [BioGRID]     | 114155140 |  |
|  |  |  | 3 | RPL28 [BioGRID]    | 13904866  |  |
|  |  |  | 2 | EXOSC7 [BioGRID]   | 189083688 |  |
|  |  |  | 2 | EXOSC5 [BioGRID]   | 47174864  |  |
|  |  |  | 2 | PLRG1 [BioGRID]    | 4505895   |  |
|  |  |  | 2 | LTV1 [BioGRID]     | 21361875  |  |
|  |  |  | 2 |                    | 223555917 |  |
|  |  |  | 2 | BRIX1 [BioGRID]    | 55770900  |  |
|  |  |  | 2 | CHERP [BioGRID]    | 119226260 |  |
|  |  |  | 2 | GLYR1 [BioGRID]    | 40556376  |  |
|  |  |  | 2 | GTPBP4 [BioGRID]   | 55953087  |  |
|  |  |  | 2 |                    | 222352111 |  |
|  |  |  | 2 | HNRNPUL2 [BioGRID] | 118601081 |  |
|  |  |  | 2 | CLASP1 [BioGRID]   | 31563537  |  |
|  |  |  | 2 | RNMTL1 [BioGRID]   | 8922534   |  |
|  |  |  | 2 | RPL32 [BioGRID]    | 4506635   |  |
|  |  |  | 2 | EIF2AK2 [BioGRID]  | 4506103   |  |
|  |  |  | 2 | NOC3L [BioGRID]    | 20806097  |  |
|  |  |  | 2 | BMS1 [BioGRID]     | 41281483  |  |
|  |  |  | 2 | DDX54 [BioGRID]    | 51094101  |  |
|  |  |  | 2 | AKAP7 [BioGRID]    | 7706527   |  |
|  |  |  | 2 | PTBP2 [BioGRID]    | 10863997  |  |
|  |  |  | 2 | EXOSC10 [BioGRID]  | 4505917   |  |
|  |  |  | 2 | CDK17 [BioGRID]    | 37595545  |  |
|  |  |  | 2 | EDC4 [BioGRID]     | 45827771  |  |
|  |  |  | 2 | FAM107B [BioGRID]  | 40254982  |  |
|  |  |  | 1 | DDX55 [BioGRID]    | 41327779  |  |
|  |  |  | 1 | DNAJC9 [BioGRID]   | 27597059  |  |
|  |  |  | 1 | ERI1 [BioGRID]     | 31543184  |  |
|  |  |  | 1 | KRR1 [BioGRID]     | 117676403 |  |
|  |  |  | 1 | SND1 [BioGRID]     | 77404397  |  |
|  |  |  | 1 | TMCO6 [BioGRID]    | 94536840  |  |
|  |  |  | 1 | RFC1 [BioGRID]     | 32528306  |  |
|  |  |  | 1 | NOP16 [BioGRID]    | 148747209 |  |
|  |  |  | 1 | RBM34 [BioGRID]    | 38016127  |  |
|  |  |  | 1 | TROVE2 [BioGRID]   | 31377800  |  |
|  |  |  | 1 | H1FO [BioGRID]     | 4885371   |  |
|  |  |  | 1 | EXOSC1 [BioGRID]   | 7705612   |  |
|  |  |  | 1 | XRN2 [BioGRID]     | 18860916  |  |
|  |  |  | 1 | MLLT1 [BioGRID]    | 21361272  |  |
|  |  |  | 1 | NOC2L [BioGRID]    | 157694511 |  |
|  |  |  | 1 | RRP15 [BioGRID]    | 126362983 |  |
|  |  |  | 1 | C20orf26 [BioGRID] | 34222104  |  |
|  |  |  | 1 | DYRK1B [BioGRID]   | 4758222   |  |
|  |  |  | 1 |                    | 194328699 |  |
|  |  |  | 1 | PAPD5 [BioGRID]    | 94536832  |  |
|  |  |  | 1 | HEXIM2 [BioGRID]   | 21389407  |  |
|  |  |  | 1 | IYD [BioGRID]      | 42794271  |  |
|  |  |  | 1 |                    | 193211480 |  |
|  |  |  | 1 | GNL2 [BioGRID]     | 7019419   |  |
|  |  |  | 1 | APOA2 [BioGRID]    | 4502149   |  |
|  |  |  | 1 | DDX52 [BioGRID]    | 38569503  |  |
|  |  |  | 1 | RIMBP2 [BioGRID]   | 140561070 |  |
|  |  |  | 1 | OR4L1 [BioGRID]    | 52317259  |  |

|  |  |  |  |   |                    |           |  |
|--|--|--|--|---|--------------------|-----------|--|
|  |  |  |  | 1 | LYAR [BioGRID]     | 8923398   |  |
|  |  |  |  | 1 | RCL1 [BioGRID]     | 157426877 |  |
|  |  |  |  | 1 | SYNE2 [BioGRID]    | 118918403 |  |
|  |  |  |  | 1 | ANKRD34A [BioGRID] | 89941470  |  |
|  |  |  |  | 1 | RNF168 [BioGRID]   | 31377566  |  |
|  |  |  |  | 1 | TAOK3 [BioGRID]    | 148746218 |  |
|  |  |  |  | 1 | KIF23 [BioGRID]    | 6754472   |  |
|  |  |  |  | 1 | RPL7L1 [BioGRID]   | 50053872  |  |
|  |  |  |  | 1 | NOP14 [BioGRID]    | 55769587  |  |
|  |  |  |  | 1 | BRI3BP [BioGRID]   | 19923665  |  |
|  |  |  |  | 1 | NOL6 [BioGRID]     | 18644728  |  |
|  |  |  |  | 1 | PARN [BioGRID]     | 4505611   |  |
|  |  |  |  | 1 | CLASP2 [BioGRID]   | 57863301  |  |
|  |  |  |  | 1 | RANGAP1 [BioGRID]  | 4506411   |  |
|  |  |  |  | 1 | HNRNPH3 [BioGRID]  | 14141157  |  |
|  |  |  |  | 1 | MOV10 [BioGRID]    | 14211540  |  |
|  |  |  |  | 1 | DDX47 [BioGRID]    | 20149629  |  |
|  |  |  |  | 1 | CHCHD2 [BioGRID]   | 7705851   |  |
|  |  |  |  | 1 | COX17 [BioGRID]    | 5031645   |  |
|  |  |  |  | 1 | PAF1 [BioGRID]     | 42476169  |  |
|  |  |  |  | 1 | GNL3 [BioGRID]     | 45593130  |  |
|  |  |  |  | 1 | GTPBP1 [BioGRID]   | 82546879  |  |
|  |  |  |  | 1 | SPATS2 [BioGRID]   | 148746220 |  |
|  |  |  |  | 1 | MYEF2 [BioGRID]    | 33620747  |  |
|  |  |  |  | 1 | EIF4E1B [BioGRID]  | 150378456 |  |
|  |  |  |  | 1 | LEO1 [BioGRID]     | 20270337  |  |
|  |  |  |  | 1 | MAPKAPK2 [BioGRID] | 32481209  |  |
|  |  |  |  | 1 | TRIM25 [BioGRID]   | 68160937  |  |
|  |  |  |  | 1 | COIL [BioGRID]     | 4758024   |  |
|  |  |  |  | 1 | EIF2A [BioGRID]    | 54873624  |  |
|  |  |  |  | 1 | PWP2 [BioGRID]     | 48762926  |  |
|  |  |  |  | 1 | PGAM5 [BioGRID]    | 20070384  |  |
|  |  |  |  | 1 | LLPH [BioGRID]     | 14150124  |  |
|  |  |  |  | 1 | CTSA [BioGRID]     | 119395729 |  |
|  |  |  |  | 1 | DIMT1L [BioGRID]   | 7657198   |  |
|  |  |  |  | 1 | PRKRA [BioGRID]    | 4505581   |  |
|  |  |  |  | 1 | ZNF346 [BioGRID]   | 6912440   |  |
|  |  |  |  | 1 | RFC2 [BioGRID]     | 28882049  |  |
|  |  |  |  | 1 | CCNB1 [BioGRID]    | 14327896  |  |
|  |  |  |  | 1 | EXOSC3 [BioGRID]   | 50511939  |  |
|  |  |  |  | 1 | CPNE3 [BioGRID]    | 4503015   |  |
|  |  |  |  | 1 | PES1 [BioGRID]     | 7657455   |  |
|  |  |  |  | 1 | TM9SF1 [BioGRID]   | 21361315  |  |
|  |  |  |  | 1 | KNTC1 [BioGRID]    | 7661960   |  |

Note that a red number indicates that all peptides assigned to this entry are shared with at least one additional entry in the database. Mouse over the number for details.



**A Advanced Search** (Project: Demo Human Gel Free)

instructions [+]

Word(s) or value(s) to query: MEPCE

Add wildcard: at the end  at the front  front and end  no wildcard

Find:  at least one of the words (separated by a space character)  
 all words (separated by a space character)  
 the exact phrase  
 include description

Experiment Detail:  [select] [remove]

Date: 2008-01 To 2010-02 [select] [remove]

Search

**B Search Results** (Project: Demo Human Gel Free)

Your search results for following criteria:

|                      |                           |
|----------------------|---------------------------|
| Word(s) or value(s): | mepce                     |
| Add wildcard:        | front and end             |
| Find:                | at least one of the words |
| Include description: | No                        |
| Experiment detail:   |                           |
| Date:                | 2000-01 To 2010-02        |

| Record Type                 | Match(es)   | Browse for Detail |
|-----------------------------|-------------|-------------------|
| Bait:                       | 1           | [Browse]          |
| Hit (Report by Bait):       | 1           | [Browse]          |
| Hit (Report by Sample):     | 2           | [Browse]          |
| TPP Hit (Report by Bait):   | 1           | [Browse]          |
| TPP Hit (Report by Sample): | 2           | [Browse]          |
| Sample:                     | 2           | [Browse]          |
| Raw File / Folder:          | total: 6    | [Browse]          |
|                             | LTQ_DEMO: 6 | [Browse]          |
| Auto-search Task:           | total: 0    |                   |

**C Search hits "MEPCE"** (Project: Demo Human Gel Free)

Column Display Set

Experiment status color keys [+]

Sample groups [+]

select to compare

| Sample ID                  | Sample Name   | BaitID | BaitGene | User                  | Date       | Exp. Status                                                                                                                                              | Score or Probability / # Peptide | Options                                                                                            |
|----------------------------|---------------|--------|----------|-----------------------|------------|----------------------------------------------------------------------------------------------------------------------------------------------------------|----------------------------------|----------------------------------------------------------------------------------------------------|
| <input type="checkbox"/> 9 | MEPCE_pelletB | 6      | MEPCE    | Prohits Administrator | 2010-01-05 | Show groups: <input type="checkbox"/> Bait <input type="checkbox"/> Experiment <input type="checkbox"/> Sample <input type="checkbox"/> Version<br>11504 | Mascot 1480 / 184                | <input type="button" value="A"/> <input type="button" value="B"/> <input type="button" value="C"/> |
| <input type="checkbox"/> 8 | MEPCE_pelletA | 6      | MEPCE    | Prohits Administrator | 2010-01-05 | 11369                                                                                                                                                    | Mascot 1480 / 152                | <input type="button" value="A"/> <input type="button" value="B"/> <input type="button" value="C"/> |

**D Search raw file "MEPCE"**

Machine Name: All

File Name:  OR

Date From: January  2000  TO February  2010

Fetch

| ID              | Folder/File Name    | Size(KB) | Project Bait Sample                 | Date                | Search Task | Options                                                           |
|-----------------|---------------------|----------|-------------------------------------|---------------------|-------------|-------------------------------------------------------------------|
| <b>LTQ_DEMO</b> |                     |          |                                     |                     |             |                                                                   |
| 22              | 8_MEPCE_pelletA.RAW | 167,540  | <input checked="" type="checkbox"/> | 2010-01-06 00:00:00 | 5           | <input type="button" value="A"/> <input type="button" value="B"/> |
| 23              | 9_MEPCE_pelletB.RAW | 180,071  | <input checked="" type="checkbox"/> | 2010-01-06 00:00:00 | 5           | <input type="button" value="A"/> <input type="button" value="B"/> |

**Supplementary Figure 18. Advanced Search Function in the Analyst module.** A) Entry page for the Advanced Search Function. Gene Name or other keywords may be used for searches; wildcards may be employed. Searches may be restricted by Experimental Detail (controlled vocabulary) and by date, if desired (here we are restricting by date). B) Summary page of the search results. MEPCE was analyzed once as a bait (2 samples), and recovered 2 times as a hit across all samples in the project. Clicking on the [Browse] button will list all instances. C) Detail of the recovery of MEPCE as a hit. A column is added that lists the search engine score (here Mascot = 1480) and the number of spectra (184 and 182). D) Detail of the raw files (top of the list only) that have "MEPCE" in their name.

**A** Exported versions for the project  
[new version]  
★ (VS1) Kinome paper 2009

**B**

| ID                            | GeneName  | Tag | ProteinID | User           | Status | Options |
|-------------------------------|-----------|-----|-----------|----------------|--------|---------|
| <input type="checkbox"/> 2619 | PTC5 - HA | HA  | 6324664   | Danielle Dewar | 2106   |         |
| <input type="checkbox"/> 2618 | PTC5 - HA | HA  | 6324664   | Danielle Dewar |        |         |

**C** Export non-filtered Bait-Hits Report (Project: Tyers\_Yeast\_Gel\_Free)

Bait List

| BaitID | GeneName(Tag)                      | ProteinID |
|--------|------------------------------------|-----------|
| 3713   | STE7-TAP 6320042 [T2][VS1]         |           |
| 3712   | HRK1-TAP 6324841 [T2][VS1]         |           |
| 3711   | STE11-TAP 6323394 [T2][VS1]        |           |
| 3710   | CKA1-TAP 6322154 [T2][VS1]         |           |
| 3709   | PSK2-TAP 6324527 [T2][VS1]         |           |
| 3708   | PSK1-TAP 6319302 [T2][VS1]         |           |
| 3707   | PKP1-TAP 6322147 [T2][VS1]         |           |
| 3706   | YCK2-TAP 6324175 [T2][VS1]         |           |
| 3705   | ATG1-TAP 6321258 [T2][VS1]         |           |
| 3704   | CBK1-TAP 6324168 [T2][VS1]         |           |
| 3700   | CGI121-3xFLAG 154199620 [FH][VS1]  |           |
| 3699   | ELM1-TAP 6322803 [T2][VS1]         |           |
| 3698   | YPL109C-TAP 50593504 [T2][VS1]     |           |
| 3696   | YGL059W-TAP 27808706 [T2][VS1]     |           |
| 3693   | CDC15-TAP 6319328 [T2][VS1]        |           |
| 3692   | ALK1-TAP 6321417 [T2][VS1]         |           |
| 3691   | KIC1-TAP 6321894 [T2][VS1]         |           |
| 3690   | TAF1-TAP 6321713 [T2][VS1]         |           |
| 3684   | TPK2_3425 6325053 [NS][FS][R][VS1] |           |

Sort by: Kinome paper 2009 (VS1) And

**D** Export Bait Report (Project: Tyers\_Yeast\_Gel\_Free)

Export rows as CSV Preview Generate Report

Please select columns to be included in the export file

**Bait:**

- Bait ID
- Bait Gene ID
- Bait Gene Name
- Bait Locus Tag
- Bait Clone
- Bait Description

**Experiment:**

- Bait Tax ID
- Bait Acc
- Bait Acc Type
- Bait MW
- Bait Vector
- Is Gel Free

**Sample:**

- Hit ID
- Hit Locus Tag
- Hit Protein ID
- Redundant GI
- Hit MW
- Result File
- Search Engine
- Search Database
- Filters
- Hit GeneID
- Hit Gene Name
- Hit Mascot Score
- Hit GPM Expect
- Total Peptide Number
- Unique Peptide Number
- Hit Coverage
- Hit Description
- Project Frequency

**Peptide:**

Pre-defined export format

[new]

Selected columns

- Bait ID
- Bait Gene ID
- Bait Gene Name
- Hit GeneID
- Hit Gene Name
- Hit Protein ID
- Hit Mascot Score
- Unique Peptide Number
- Total Peptide Number

**E**

Groups (project: Gingras\_Lab\_Public)

- Bait Groups [add new] [import from other projects] [+]
- Experiment Groups [add new] [import from other projects] [+]
- Sample Groups [add new] [import from other projects] [+]
- Export Versions [add new] [import from other projects] [+]

Name: Yeast interactome v4

Type: Export

Description: This is the list of the selected runs to be analyzed for version 4 of the yeast interactome. Date stamp Oct 26th, 2009, 4pm. ACG

Initial: VS7

Icon: ★

Save Reset Close

**Supplementary Figure 19. Exporting hits lists for a selected set of Samples.** A) ProHits enables the creation of lists of samples that can be flagged for Export. This is particularly useful when preparing data for publication. The icon(s) corresponding to the exported group associated with a project will be found at the top of the Bait or Sample Report page. B) To flag a new bait or sample for inclusion in an Export group, click on the “Notes” icon, and select the appropriate export version. After refreshing the page, the new icon will appear in the Status column. C) To export all hits associated with an Export group, under the “Other tools” options in the main page of Analyst, select Export Functions> Export non-filtered Bait-Hits Report. Select desired Export version (here: Kinome paper 2009, VS1). Only the baits specifically tagged with [VS1] will be displayed. Select all (if desired), and generate report. D) The Export Bait Report page allows you to select the parameters to be included in the Report. By default, the report will be generated as a \*.csv file. E) Additional Export versions can also be created by selecting “Manage Protocols and Lists”>Group Lists>Export Versions.

**A**

Home

Create New Entry

- Add Gel-free Sample
- Add Gel-based Sample
- Upload Search Results

Individual Reports

- Report by Bait
- Report by Samples
- Report by Plate
- Report by Gel

Multiple Sample Analysis

- Comparison
- Comparison\_dev11
- Comparison\_dev12

Manage Protocols and Lists

- Text-based Protocols
- Experimental Editor
- Background Lists
- Group Lists

Other Tools

- CO-IP Report
- Export functions
- Advanced Search
- Help

Data Management

Log Out

**B**

*Protocols* (Project: Demo Human Gel Free) [Export protocols]

Biological Material [add new] [import from other projects] [-]

Tet Inducible Flip-In 293

Protocol ID: 10  
 Protocol Type: Biological Material  
 Project: Demo Human Gel Free  
 Protocol Name: Tet Inducible Flip-In 293  
 Created by: Prohibits Administrator  
 Creation date: 2010-01-05  
 Protocol Detail: Human [taxid:9606] cells [Flip-In T-REX 293 cells], passage 15 (from S. Angers' laboratory), were transfected in a 6 well format with 0.2 µg of tagged DNA [pCDNA5-FLAG-protein] (Open/Frezer V4071) and 2 µg pOG44 (Open/Frezer V4134), using lipofectamine PLUS (Invitrogen), according to the manufacturer's instructions. On day 2, cells were trypsinized, and passaged into 3 x 10 cm plates, in a two-fold dilution series. On day 3, the medium was replaced by DMEM 5% Fetal bovine serum 5% calf serum 100 units/ml pen/strep 200 µg/ml hygromycin. Medium was replaced every 3 - 4 days until non-transfected cells die and isolated clones are ~2 mm in diameter (13-15 days). The clone position was marked at the bottom of the plates. [Stable cell clones] were picked by trypsinization using 2 mm sterile 3MM filter papers dipped into trypsin. Paper circles are transferred into 24 well plates, each well containing 1 ml of complete growth containing 10% Tet system-tested FBS (Corning 631106) medium with hygromycin. Clones were amplified into 3 x 24 well plates; one plate was used for monitoring the expression level -tet; another 1 after adding tet (1 µg/ml for 24 hours), and the other well was used to maintain cells. Selected clones were amplified (in selection medium), eventually to 8 x 15cm plates, one of them being used for freezing back a low passage stock (4 tubes), one for maintaining the culture, and 6 for induction and harvesting (these were grown without hygromycin prior to harvesting). Cells at ~60-70% confluence were induced with 1µg/ml tetracycline for 24 hours. Subconfluent cells (~85-95% confluent) were harvested as followed: medium was drained from the plate, 1 ml ice-cold PBS was added, and the cells were scraped (using a silicon cake spatula) and transferred to a 15 ml conical tube on ice. Cells were collected by centrifugation (5 min, 1500 G, 4°C), the PBS was aspirated, and cells were resuspended in 10 ml ice-cold PBS prior to centrifugation (5 min, 1500 G, 4°C). This step was repeated once more, remaining PBS is aspirated, and the weight of the cell pellet is determined. Cell pellets are frozen on dry ice, and transferred to -80°C until needed.

Affinity Purification [add new] [import from other projects] [+]

Peptide Preparation [add new] [import from other projects] [+]

LC-MS [add new] [import from other projects] [+]

**C**

*Non-specific (background)* import from other project

Projects: Demo Human Gel Free Non-specific Set: FLAG\_top\_contaminant

Set Name:  Add as new  Append to existing

----Select a group----

Import

| GeneID | GeneName | Gene Alias                                                                             | Links               |
|--------|----------|----------------------------------------------------------------------------------------|---------------------|
| 58     | ACTA1    | ACTA<br>ASMA<br>CFTD<br>CFTD1<br>CFTDM<br>MPFD<br>NEM1<br>NEM2<br>NEM3<br>RP5-1068B5.2 | [Gene]<br>[BioGrid] |
| 345651 | ACTBL2   | ACT<br>DKFZp686D0972                                                                   | [Gene]<br>[BioGrid] |

**D**

*Controlled Vocabularies* (Experimental Details)

Click "+" to add new selection or option

Edit selection [+]

Interaction detection method [-]

MI:0007 anti tag coimmunoprecipitation [X]

MI:0006 anti bait coimmunoprecipitation [X]

MI:0096 pull-down [X]

Add

**E**

*Groups* (project: Demo Human Gel Free)

Bait Groups [add new] [import from other projects] [+]

Experiment Groups [add new] [import from other projects] [+]

Sample Groups [add new] [import from other projects] [-]

Cross-contamination - major [add new] [import from other projects] [+]

Cross-contamination - warning [add new] [import from other projects] [+]

Poor quality sample - major [add new] [import from other projects] [+]

Poor quality sample - warning [add new] [import from other projects] [+]

Good quality sample [add new] [import from other projects] [+]

Export Versions [add new] [import from other projects] [+]

**Supplementary Figure 20. Managing Protocols and Lists.** A) In the Analyst Module menu, the user finds a series of tools to assist in managing protocols and lists. B-E) Entry pages of the various editors: B) Text-based Protocols; C) Background Lists; D) Controlled Vocabularies of Experimental Details; E) Groups (Bait, Experiment or Sample; this also includes another type of grouping, called "Export Versions", detailed in Supplementary Fig. 16).

A



### Export interaction data in PSI-MI XML v2.5 format

The HUPO Proteomics Standards Initiative (PSI) defines community standards for data representation in proteomics to facilitate data comparison, exchange and verification. One of its workgroups deals with Molecular Interactions (PSI-MI), with PSI-MI XML v2.5 being the preferred format for submitting data to the IMEx consortium interaction databases. ProHits helps you prepare your submission to IMEx databases by mapping the controlled vocabulary necessary for data submission and preparing the XML file for you.

The IntAct database encourages and welcomes direct user submission of molecular interaction data. Datasets may be deposited prior to publication to a peer-reviewed journal. The IntAct team will be happy to assist you with final data preparation, and will make your submission publicly available as soon as your article is published.

[contact IntAct]



### Export interaction data in MITAB format

The HUPO Proteomics Standards Initiative (PSI) defines community standards for data representation in proteomics to facilitate data comparison, exchange and verification. One of its workgroups deals with Molecular Interactions (PSI-MI), with MITAB being their tab delimited data exchange format. MITAB is the preferred format for submitting data to the BioGRID interaction database. ProHits helps you prepare your submission to BioGRID by mapping the controlled vocabulary necessary for data submission and preparing the tab delimited file for you.

B


(Project: Demo Human Gel Free)

### Export interaction data in PSI-MI XML v2.5 format

Instructions [+]

Bait List    Sample List    Mascot    GPM    TPP\_Mascot    TPP\_GPM    Generate Report

| BaitID | GeneName(Tag)    | ProteinID |
|--------|------------------|-----------|
| 10     | FLAG_6lonen-Flag |           |
| 9      | RAFLIN-Flag      | 4556401   |
| 8      | WASLN-Flag       | 5170235   |
| 7      | EFA4ZIN-Flag     | 83700235  |

  

| BaitID | GeneName(Tag) | ProteinID |
|--------|---------------|-----------|
| 6      | MEPCEN-Flag   | 47271406  |

Sort by group:    
 Then sort by:    
 Sort bait list

Experiment Filters:   
 Mascot Score:  Coverage:  %   
 Peptide: Unique Peptide:  < 5 > Frequency: Project Frequency:  > 25 < %   
  Background Set: FLAG\_top\_contaminant   
  Carry-Over  Soil-Over  Auto-MW Exclusion

Bio Filters:   
  Ribosomal  Cytoskeleton  Bait  Keratin   
  Artifact Protein  Translation Elongation Factor  DEAD/H Box  Albumin

C


(Demo Human Gel Free)

### Export interaction data in PSI-MI XML v2.5 format

|                |                              |                                                                                                                                                                                                                                                                 |                   |
|----------------|------------------------------|-----------------------------------------------------------------------------------------------------------------------------------------------------------------------------------------------------------------------------------------------------------------|-------------------|
| Your Institute | Name                         | Samuel Lunenfeld Research Institute                                                                                                                                                                                                                             |                   |
|                | Address                      | 600 University Ave, Rm 992                                                                                                                                                                                                                                      |                   |
|                | Title                        | A benchmarking set for AP-MS                                                                                                                                                                                                                                    |                   |
| Publication    | Journal Name                 | In preparation                                                                                                                                                                                                                                                  |                   |
|                | First Author                 | Jane Doe                                                                                                                                                                                                                                                        |                   |
|                | Author List                  | Jane Doe and John Doe                                                                                                                                                                                                                                           |                   |
|                | Contact Email                | gingras@lunenfeld.ca                                                                                                                                                                                                                                            |                   |
| Experiment     | Published                    | <input type="checkbox"/>                                                                                                                                                                                                                                        |                   |
|                | Host Organism                | <input type="text" value="Homo sapiens (human)"/><br>NCBI taxid for the Host Organism in which the interaction took place.<br>Mandatory.<br><input type="text" value="293 Flp-In T-REx Invitrogen"/><br>Details of tissue or cell lines may be added as option. |                   |
|                | Interaction detection Method | <input type="text" value="anti tag coimmunoprecipitation"/>                                                                                                                                                                                                     |                   |
|                | Searched Database            | Database Name                                                                                                                                                                                                                                                   | Database version: |

  

D

```

<?xml version="1.0" encoding="UTF-8" ?>
<proteomics xmlns="http://proteomics.intact.org/1.0" xmlns:xsi="http://www.w3.org/2001/XMLSchema-instance"
xsi:schemaLocation="http://proteomics.intact.org/1.0 http://proteomics.intact.org/1.0/proteomics.xsd" >
  <source <id>"1" <name>"Lunenfeld Research Institute" />
  <contact <id>"1" <name>"Samuel Lunenfeld Research Institute" />
  <name <id>"1" <name>"A benchmarking set for AP-MS" />
  <first-author <id>"1" <name>"Jane Doe" />
  <author-list <id>"1" <name>"Jane Doe and John Doe" />
  <contact-email <id>"1" <email>"gingras@lunenfeld.ca" />
  <published <id>"1" <published>"false" />
  <host-organism <id>"1" <name>"Homo sapiens (human)" />
  <interaction-detection-method <id>"1" <name>"anti tag coimmunoprecipitation" />
  <searched-database <id>"1" <name>"refseq" />
  <database-version <id>"1" <version>"V_37" />
  <protein <id>"1" <name>"MEPCEN-Flag" />
  <peptide <id>"1" <name>"MEPCEN-Flag" />
  <protein <id>"2" <name>"FLAG_6lonen-Flag" />
  <peptide <id>"2" <name>"FLAG_6lonen-Flag" />
  <protein <id>"3" <name>"RAFLIN-Flag" />
  <peptide <id>"3" <name>"RAFLIN-Flag" />
  <protein <id>"4" <name>"WASLN-Flag" />
  <peptide <id>"4" <name>"WASLN-Flag" />
  <protein <id>"5" <name>"EFA4ZIN-Flag" />
  <peptide <id>"5" <name>"EFA4ZIN-Flag" />
  </proteomics>
    
```

E

```

# MITAB file generated from ProHits
# Header: BaitID, GeneName(Tag), ProteinID, Mascot Score, Coverage, Peptide, Unique Peptide, Frequency, Project Frequency, Background Set, Carry-Over, Soil-Over, Auto-MW Exclusion, Bio Filters
# Body: 6, MEPCEN-Flag, 47271406, 100, 100, MEPCEN-Flag, MEPCEN-Flag, 1, 1, FLAG_top_contaminant, false, false, false, false
# Body: 10, FLAG_6lonen-Flag, , 100, 100, FLAG_6lonen-Flag, FLAG_6lonen-Flag, 1, 1, FLAG_top_contaminant, false, false, false, false
# Body: 9, RAFLIN-Flag, 4556401, 100, 100, RAFLIN-Flag, RAFLIN-Flag, 1, 1, FLAG_top_contaminant, false, false, false, false
# Body: 8, WASLN-Flag, 5170235, 100, 100, WASLN-Flag, WASLN-Flag, 1, 1, FLAG_top_contaminant, false, false, false, false
# Body: 7, EFA4ZIN-Flag, 83700235, 100, 100, EFA4ZIN-Flag, EFA4ZIN-Flag, 1, 1, FLAG_top_contaminant, false, false, false, false
# Footer: # MITAB file generated from ProHits
    
```

**Supplementary Figure 21. Preparing interaction reports for submission to interaction databases.** A) ProHits tracks all controlled vocabularies (CVs) necessary for the submission of interaction data to standards-compliant databases and assists the experimentalist in the preparation of PSI-MI 2.5 interaction data reports; both the XML format, preferred by the IMEx consortium, (including IntAct), and the MITAB format used by BioGRID are supported. B) To begin the preparation of the reports, select the baits or samples to be included and apply the desired set of filters. C) When you press the [Generate Report] button, a new window will pop up that will prompt you to add missing information for generation of the PSI-MI XML or MITAB files. D) XML file generated from ProHits E) MITAB file generated from ProHits; both types of files can be downloaded onto your desktop and are ready to be submitted to interaction databases.

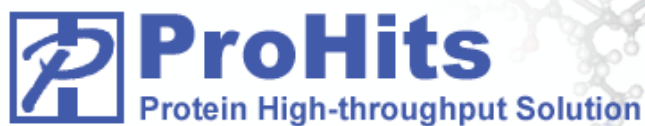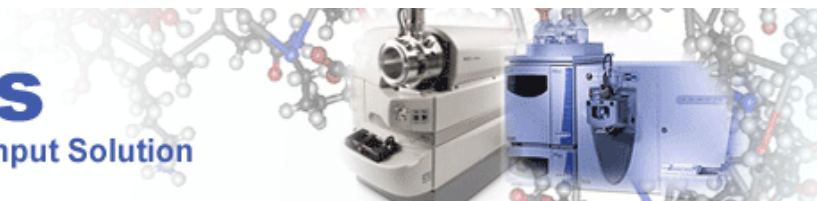

## Welcome to ProHits

ProHits is an open source software package (distributed under an Apache 2.0 license) designed to help scientists store, search and analyze mass spectrometry data. Although the platform is flexible and easily amenable to different types of projects, the system is designed to maximize the biological information from high-throughput protein-protein interaction experiments. The platform provides secure storage of mass spectrometry data, integration with search engines and mass spectrometry analytical tools (including Mascot, and the open source X!Tandem and TPP pipeline), and web-based queries of the results. An analysis module allows easy visualization of data, comparison of multiple experiments, and permits export to third-party software. A Cytoscape link provides added functionality and allows exploration of the results in a network view, with quantitative mass spectrometric information encoded and visualized as an edge attribute. ProHits also tracks all information required for deposition of the data into standards compliant public repositories, as well as for submission of manuscripts to standards compliant journals, and facilitate data export.

The software is modular and can be readily adapted by programmers to customize data flows. Written in PHP, the main database can be installed on MySQL. Users within a site easily access their results through a web interface, without the need to install additional software. The project is still under active development, and additional modules and functionality will be integrated in the core database. Programmers at other institutions are encouraged to develop tools and adds-in to ProHits (more details about this will be posted on our website, [www.ProHitsMS.com](http://www.ProHitsMS.com)).

## ProHits distribution

The source code is available at [www.ProHitsMS.com](http://www.ProHitsMS.com); demo data is included in the downloadable version. Note that an active public site hosted at the Samuel Lunenfeld Research Institute also contains the same demo data, and is available for navigation via a web interface (without the need for software installation). **Because of firewall issues, however, the pages displaying the search results (Mascot, X!Tandem and TPP) are not available from outside of our Institute.**

## Documentation

- 1) Instruction manual for users
  - a. ProHits MS Data Management
  - b. ProHits Analyst
- 2) Installation instructions for database managers
- 3) Short video tutorials (guided tours)
- 4) Online help file (accessed through clicking on  or [help] on the website).

## At a glance:

ProHits was designed to help manage protein-protein interaction projects. Projects are created in the "Admin Office" module, and several levels of security exist for users and projects. Data is entered in each stage of the projects in a Bait-dependent manner.

In a typical affinity purification coupled to mass spectrometry (AP/MS) experiment (shown below), the bait protein of interest is epitope-tagged, expressed in a relevant cell, and the bait and associated proteins are recovered. Gel-free or gel-based samples are then digested, and the peptides are submitted to liquid chromatography coupled to tandem mass spectrometry. CID spectra are searched using database matching algorithms and statistical analysis software, and the list of interactors is returned. Major challenges in the analysis of protein-protein interaction data include the difficulty of comparing many experiments simultaneously and the presence of background contaminants within the list of identified proteins. ProHits allows the user to compare multiple AP/MS analyses and to identify "frequent flyers" or other contaminants. Note that the same logic also applies for other types of bait purifications, providing that appropriate controls are generated.

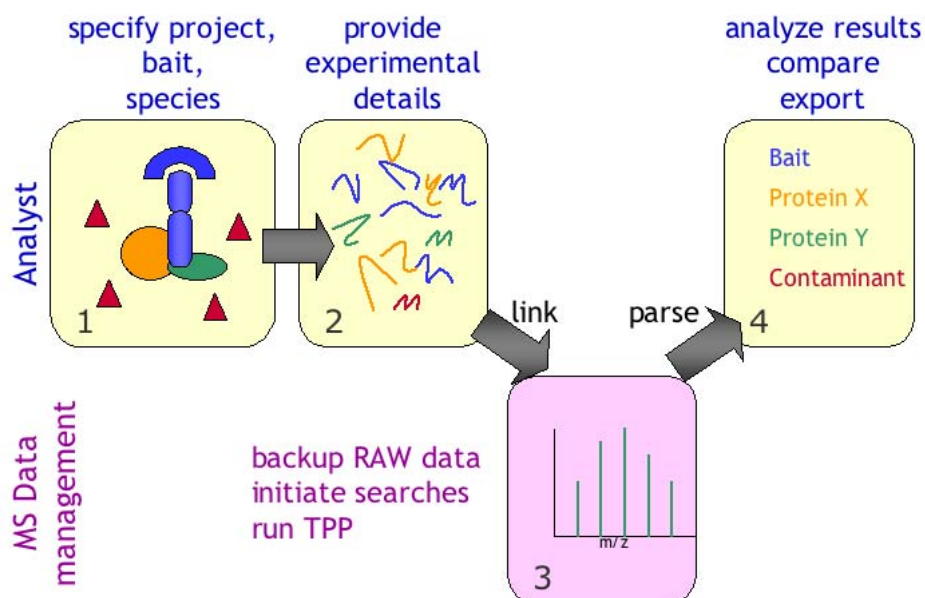

ProHits handles the information in two linked databases: in the first database, the Analyst, information regarding the identity of the bait as well as experimental details (e.g. tissue or cell line, AP conditions, MS protocols, band position on the gel) is entered. This module interfaces with the MS Data Management module, where the raw data are automatically backed up, analyzed with user-specified database search engines including Mascot or X!Tandem, and further scored via the TransProteomics pipeline (TPP). Every raw MS datafile is linked to a bait and experimental details defined in the Analyst module, and the results of the database searches are transferred (parsed) into the Analyst database. As shown in detail in this instruction manual, once the data are searched and parsed, the scientist can visualize the data for each of the files, and export this data to Excel files or Cytoscape. The Analyst module also allows for the comparisons of hundreds of samples simultaneously. Several filters allow for removal of proteins that are identified in negative control runs, that are identified at a high frequency, that have lower scores, etc., enabling efficient biological inference from the data.

### Instruction manuals for users

These manuals are designed to help end-users navigate a pre-installed ProHits database. For installation, refer to "installation instructions for database managers".

### ProHits modules overview

Access your local ProHits web database (the address will be specified by your database manager). Alternatively, access the demo version hosted by the Samuel Lunenfeld Research Institute at [www.ProHitsMS.com](http://www.ProHitsMS.com) and register as a user (registration is free). When you access ProHits, you will see the following screen that provides you links to the different sections of the ProHits database.

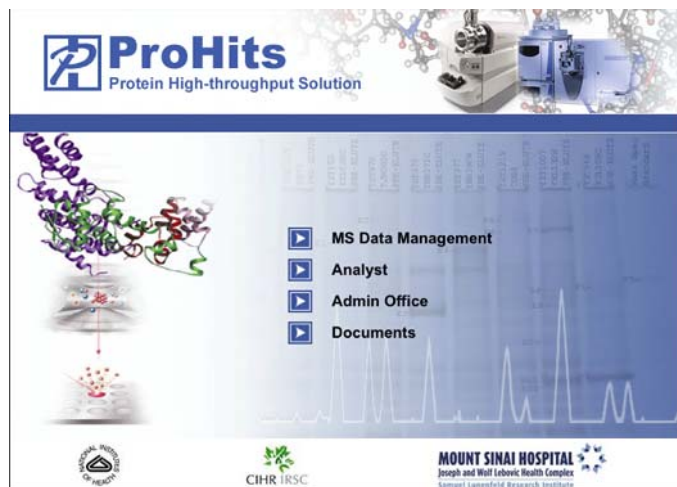

These sections are briefly described below:

**MS Data Management** allows you to store your RAW mass spectrometry data from multiple instruments and to initiate database searches using either the commercial Mascot search engine (license from Matrix Science version 2.2 is necessary) or the free Open Source search engine X!Tandem. Search results can be further analyzed using the TransProteomic Pipeline (TPP, an Open Source software suite, version 3.4) and viewed directly within the MS Data Management module. Alternatively, search engine (or TPP) results can be transferred (parsed) into a bait-centric relational database, the Analyst module.

**Analyst** is a relational database that allows users to store, annotate, filter, compare and export protein and peptide identification results generated by search engines and/or the TPP in the MS Data Management module. The system is optimized for use in interaction proteomic analyses, in which a given protein (bait) is recovered in association with its binding partners (hits). Analyst supports both gel-based proteomic experiments and gel-free experiments.

**Admin Office** allows mass spectrometry specialists and database administrators to manage instrument backups, protein databases, users, projects and filters.

**Documents** contains the latest versions of the user manuals and other relevant information (this section is not password protected).

**Accessing ProHits:** To access ProHits functions, the database administrator first configures a profile for each user and provides them with the required level of privileges (refer to installation and guide for database managers). The user then enters his/her information when prompted.

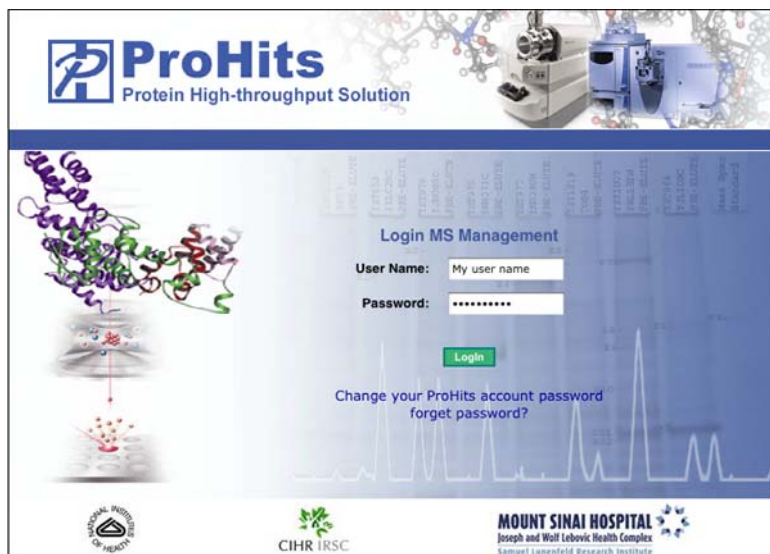



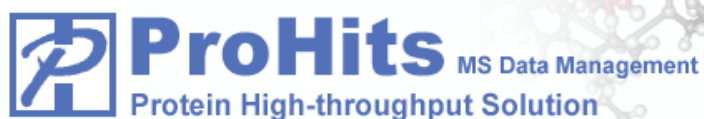

## ProHits MS Data Management

### User manual - demo

Version demo 1, prepared on Feb 09, 2010 by Anne-Claude Gingras, with help from Brian Raught, Wade Dunham and Brett Larsen (earlier versions prepared with input from Frank Liu, JP Zhang, Brian Raught, Brett Larsen, Karen Colwill, Zhen Lin and Lisa D'Ambrosio).

## Contents

|                                                           |    |
|-----------------------------------------------------------|----|
| Using the "MS Data Management" module .....               | 2  |
| Storage .....                                             | 3  |
| Selecting instruments and folders .....                   | 4  |
| Data file conversion .....                                | 5  |
| Linking files to the Analyst module .....                 | 6  |
| Using Auto Search for database searching .....            | 7  |
| Manually initiate searches .....                          | 9  |
| Automatically initiate searches .....                     | 10 |
| Search Task view .....                                    | 10 |
| View Search Results .....                                 | 11 |
| Analyze results using the TransProteomic Pipeline .....   | 11 |
| Linking files to Analyst .....                            | 12 |
| Parsing files to the Analyst module .....                 | 13 |
| Other options .....                                       | 15 |
| Creating activity reports for the RAW files .....         | 15 |
| Searching files and retrieving RAW data .....             | 16 |
| Basic Troubleshooting of the Data Management module ..... | 17 |

## Using the "MS Data Management" module

Once you have selected the MS Data Management module from the ProHits access page and have logged in, the following screen will appear.

At the top of the page (left), you will find the tabs "Home", "Storage" and "Auto Search" which will allow you to navigate between the storage and the search areas of the MS Data Management Module. On the right is a link to the Analyst module which can be accessed from every page of the MS Data Management module.

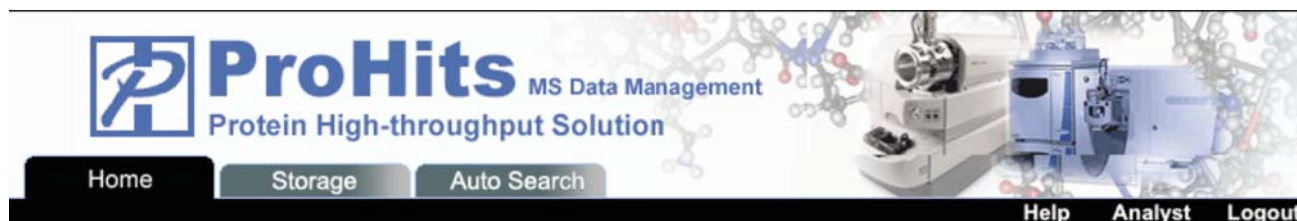

### Overview

#### Welcome to ProHits

ProHits is an open source software tool designed to help scientists manage, search and analyze mass spectrometry data.

**MS Data Management** allows you to store raw mass spectrometry data from multiple instruments, and to initiate database searches using the commercial Mascot search engine (licence from Matrix Science is necessary) and/or the free Open Source search engine X!Tandem. Search results can be further analyzed using the TransProteomic Pipeline (TPP, an Open Source software suite), and viewed directly within the MS Data Management module. Alternatively, search engine (and/or TPP) results can be transferred (parsed) into a bait-centric relational database, the **Analyst** module.

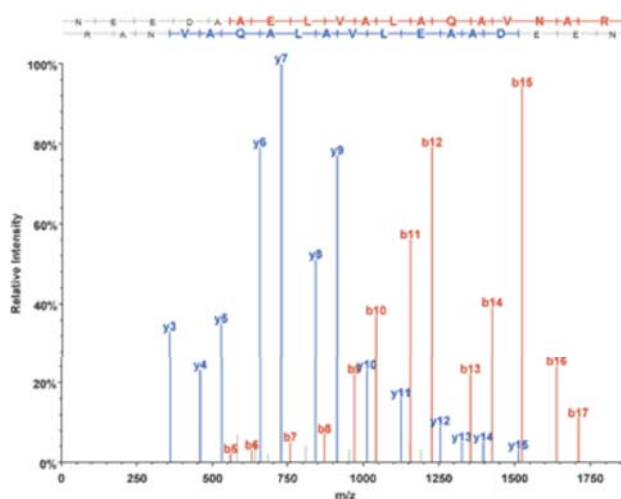

The **Storage** section allows you to monitor the transfer of data from each of the acquisition computers to the ProHits backup system. It also allows you to search, browse and download files, convert RAW files to other formats, and manually upload RAW data.

The **Auto Search** section allows you to perform database searching on specified files using user-defined search engines and parameters, to explore the results, and to transfer search results to the Analyst module. It also allows for database searches to be pre-scheduled for data files that will be acquired at a later time.

The "Storage" section allows you to monitor the transfer of the data from each of the acquisition computers to the ProHits backup system. It also allows you to search, browse and download files, convert RAW files to other formats, and manually upload raw data.

The "Auto Search" section allows you to schedule and perform database search tasks on specified files using user-defined search engines and parameters, in addition to results exploration and linking to experimental information in the Analyst module.

## Storage

### ⇒ Select the "Storage" tab

ProHits manages the backup and storage of data files in an instrument-dependent manner. The left of this screen provides links to all available instruments in the mass spectrometry facility (also shown as pictures). Here, you can also view the Backup log, and the location of the database and data storage. The central part of the page details the status of each of the connections. A green arrow indicates a functional connection while a broken red arrow denotes a non-functional connection.

Note that the storage tab example shown below is for the Samuel Lunenfeld Research Institute facility; in the demo version only a single instrument (LTQ\_demo) is listed. For the purpose of this user manual, we will toggle between the demo version and the live site at the Samuel Lunenfeld Research Institute.

**ProHits MS Data Management**  
Protein High-throughput Solution

Home Storage Auto Search Help Analyst Logout

**Raw Data Storage**

The storage of Prohits is designed to automatically perform data collection and management for mass spectrometry. All MS raw data files will be saved to the Prohits computer (192.197.250.146 : /export/home0/) and a MYSQL database 192.197.250.119 : prohits\_manager will store the data information. This page will check all connections between Prohits and mass spectrometry computers. If there are any broken connections →, please notify Prohits administrator.

Storage Database Computer:  
IP address: 192.197.250.119  
Storage Database Name: prohits\_manager

Storage Computer:  
IP address: 192.197.250.146  
Storage Folder: /export/home0/

4000QTRAP  
LCQ  
LCQtrap  
LTQ1  
LTQACG  
LTQMT  
LTQXL  
Nanospray  
ORBITRAP  
QSTARELITE  
QstarOMaldi  
Qtrap

Backup Log

August 2008

Go Today

| S  | M  | T  | W  | TH | F  | S  |
|----|----|----|----|----|----|----|
|    |    |    |    |    | 1  | 2  |
| 3  | 4  | 5  | 6  | 7  | 8  | 9  |
| 10 | 11 | 12 | 13 | 14 | 15 | 16 |
| 17 | 18 | 19 | 20 | 21 | 22 | 23 |
| 24 | 25 | 26 | 27 | 28 | 29 | 30 |
| 31 |    |    |    |    |    |    |

04 Aug 2008

• Prohits lost connection with 4000QTRAP data folder. The source directory is empty.

**Annotations:**

- This links to individual instruments backed up on Prohits in your facility
- Select to monitor file transfer from your acquisition computer to Prohits and view the log for the RAW file converters and the RAW file merge functions
- Location of storage; this is set-up by your administrator
- Status notification. Successful links are shown by green arrows. When Prohits is unable to backup data from one mass spectrometer, an orange broken arrow will appear. You will also see a note appearing at the bottom of the page detailing the problem..

## Selecting instruments and folders

The files backup organization mirrors the set-up on each acquisition computer (the computer linked to the MS instrument). Subfolders are allowed on the acquisition computer. Selecting the instrument will open a new page allowing you to browse files and projects. In this demo version, only one instrument (LTQ\_demo) is available.

→ **Select an instrument (LTQ\_demo) by clicking on a link on the left of the page**

At the bottom of the page, the folders associated with this instrument are listed (along a unique identifier assigned by ProHits). Folders are associated to individual "Analyst" projects defined in the Admin Office. Note the suffixes "\_P1", "\_P2" or "\_P3" appended to the end of the folder names (e.g. "Demo\_Human\_GelFree\_P3"). These suffixes will allow the creation of automatic links (autolinks) between the mass spectrometry data files and samples defined in the Analyst module, and will be discussed later.

The Search Task column allows you to navigate to the search results page(s) associated with files in this folder. In the Options column, clicking  will open the folder, while selecting  will download the files associated with this folder onto your local computer.

ProHits automatically backs up any new files from the acquisition computer at a time specified by the administrator.

The user may also initiate a manual back up by clicking [Backup File Now] (towards the top of the page). Please note that to prevent file corruption, ProHits has a timed delay for file transfer (delay specified by administrator – we use 2.5 hours after the last file modifications).

To upload raw files from an instrument not connected to the ProHits backup system, select [Upload Raw Files] and navigate through the options. This function can also be used to upload converted files to be searched in ProHits.

### ⇒ Select a folder (Demo\_Human\_GelFree\_P3) to open

In addition to the files located on the acquisition computer, the selected folder will also contain any files that you have converted from original raw files to other formats. This folder will also contain any file manually uploaded through the link on the previous page. Here, we show the raw file 9\_MEPCE\_pelletB.RAW (acquired on a Thermo LTQ instrument) already converted to .mzXML (for searches using X!Tandem) and .mgf (for Mascot searches).

**ProHits** MS Data Management  
Protein High-throughput Solution

Home Storage Auto Search Help Analyst Logout

LTQ\_DEMO

Fetch Raw File

Raw File Status.

Backup Log

LTQ\_DEMO raw data

download auto-link manual link no link

Plate/Folder Name: Demo\_Human\_GelFree\_P3  
Folder Storage ID: 21  
Prohits Analyst Plate ID: [Edit]  
Project Name: Demo Human Gel Free  
Created on: 2010-01-06 00:00:00  
Total files: 30

Convert Selected file to : mzXML Convert

Upload Raw Files Back

Demo\_Human\_GelFree\_P3 0(MB) 2010-01-06

| ID | File Name             | Size    | Project Bait sample                 | Date                | Search Task | Download | Convert                  |
|----|-----------------------|---------|-------------------------------------|---------------------|-------------|----------|--------------------------|
| 23 | 9_MEPCE_pelletB.RAW   | 180,071 | <input checked="" type="checkbox"/> | 2010-01-06 00:00:00 | 5           |          | <input type="checkbox"/> |
| 34 | 9_MEPCE_pelletB.mzXML | 239,997 | <input type="checkbox"/>            | 2010-01-07 15:43:30 |             |          | <input type="checkbox"/> |
| 35 | 9_MEPCE_pelletB.mgf   | 435,683 | <input type="checkbox"/>            | 2010-01-07 16:16:23 |             |          | <input type="checkbox"/> |

### Data file conversion

ProHits can automatically convert Thermo RAW files to the database search engine preferred file types as part of the AutoSearch pipeline. Alternatively, RAW files can easily be converted here. To convert RAW files to mgf, mzXML or dta format, simply choose the desired files by clicking the associated boxes in the "Convert" column, select the desired format (and conversion parameters if available) and hit "Convert". If you are converting to either .mgf or .dta files, you will be given the option to combine (or merge) several files. By selecting to convert to either of these file types, the dialog box will be expanded allowing for the selection of files to be merged and for manual curation of the merged file name. This option is especially useful for combining files from fractionation of one sample (e.g. gel bands from the same lane).

Convert Selected file to : DTA Merge files Convert

Xcalibur Parameters: -B300 -T5000 -M1 -S1

Type merged file name

Convert Cancel

Demo\_Human\_GelFree\_P3 0(MB) 2010-01-06

Note that at the present time the publicly released version of ProHits can only convert data from Thermo instruments. Please refer to <http://tools.proteomecenter.org/wiki/index.php?title=Formats:mzXML>, <http://psidev.info/index.php?q=node/257>, or <http://proteowizard.sourceforge.net/> for converters for additional instruments proprietary formats.

## Linking files to the Analyst module

As mentioned in the general introduction, RAW files located in the Data Management module can be linked to Baits>Experiments>Samples defined in the Analyst module and the Search Results can be transferred (parsed) from the Data Management module to the Analyst module.

| ID | File Name                 | Size    | Project Bait sample | Date                | Search Task | Download | Convert                  |
|----|---------------------------|---------|---------------------|---------------------|-------------|----------|--------------------------|
| 31 | 16_FLAG_alone_pelletC.RAW | 102,264 |                     | 2010-01-06 00:00:00 |             |          | <input type="checkbox"/> |
| 30 | 17_FLAG_alone_pelletD.RAW | 143,728 |                     | 2010-01-06 00:00:00 |             |          | <input type="checkbox"/> |
| 29 | 15_RAF1_pelletB.RAW       | 152,160 |                     | 2010-01-06 00:00:00 |             |          | <input type="checkbox"/> |
|    |                           |         |                     | 2010-01-06          |             |          |                          |

The chain link icons in each table of the Data Management module indicate the linking status:

(broken white chain link) indicates that the file is not linked to any sample in the Analyst module,  
 (intact yellow chain) indicates that a link to a sample in the Analyst module has been manually created,  
 (intact green chain) indicates that a link has been created automatically (also called "Autolink").

⇒ To create manual links, click in the "project Bait/sample" column.

This opens up a new dialog box allowing you to select the desired Project, Bait, and Sample. Upon closing the box, the yellow chain link icon will appear.

Creating automatic links requires interfacing with the Analyst module and using a standardized naming scheme. This will be described in a separate section.

Creation of New Baits and Samples will be described in the instructions for the Analyst module module.

### Link Raw file to Prohits Sample

---

Raw file information

Machine Name: LTQ  
 Raw File: Demo\_Human\_GelFree\_P3 / 16\_FLAG\_alone\_pelletC.RAW  
 Folder Project: Demo Human Gel Free

Link to Experiment Sample

Gel    Gel Free

Project Name: (3) Demo Human Gel Free  

Bait: (10) FLAG\_alone  

Experiment: (12) FLAG\_alone\_pelletC  

Gel: Gel Free

Sample: (16) FLAG\_alone\_pelletC

This completes the overview of the "Storage" part of the Data Management module of ProHits. In the next section, we will navigate through the searching and parsing functions.

## Using AutoSearch for database searching

⇒ Select the "AutoSearch" tab at the top of the page

This view displays all the search engines and other tools which have been linked to your ProHits database in the top portion of the page. As with the link to different mass spectrometers in the Storage area, successful links to search engines are indicated by green arrows and broken links by a broken orange arrow.

You can modify the general search parameters from this page; you will also be able to modify search parameters when initiating searches. ProHits simply employs the standard interfaces provided by the search engines and allows you to create several standard search parameters sets.

**Parameter Setup**  
ProHits monitors connections to the search engines. Broken connections are indicated by a broken red arrow.

Storage Computer: 192.197.251.36  
Storage Folder: /ms/Storage/

- Xcalibur Parameters (RawConverter)**  
Convert Finnigan Xcalibur RAW file to peak lists. ( http://10.197.104.18/RawConverter )
- Mascot Parameters**  
Create or modify Mascot search parameter set. ( http://192.197.250.115/mascot )
- The GPM Parameters**  
Create or modify the GPM search parameter set. ( http://thegpm.mahri.on.ca/tandem/thegpm\_tandem.html )
- The TPP Parameters**  
Create or modify the TPP parameter set. ( v4.0.JETSTREAM rev 2, Build 200901301833 (linux) )

**Tasks and Results**

**LTQ\_DEMO**

- Setup new task
- View tasks
- Browse search results by folder
- Parse search results to ProHits/Analyst

The bottom part of the page allows you to access individual instruments for search purposes, by simply clicking on the links or on the instruments.

⇒ Select an instrument for searching (for this tutorial, we will select LTQ\_Demo)

The entry page lists all of the search tasks that were performed for files collected on a given instrument. A given task may be applied to several files not necessarily located within the same subfolder or in the same format. We will return to this list later after we have created a New Task.

The table lists the current Tasks. To view the search parameters and a list of the searched files, press . To view the search results, press: (Results details).

The left menu bar allows you to add or manage Tasks, as well as to view the logs.

**LTQ\_DEMO Search Tasks**

| Project Name        | ID |
|---------------------|----|
| Demo Yeast Gel      | 1  |
| Demo Yeast Gel Free | 2  |
| Demo Human Gel Free | 3  |

[List Search Results by Folder]  
Total : 4 (1 Page) 1

| Task ID | Analyst PlateID | Project | Task Name             | Status   | Task Detail | Result Detail                       |
|---------|-----------------|---------|-----------------------|----------|-------------|-------------------------------------|
| 7       | 1               | 1       | Gel_based demo search | Finished |             | <input checked="" type="checkbox"/> |
| 6       | 0               | 2       | yeast_demo_search     | Finished |             | <input checked="" type="checkbox"/> |
| 5       |                 | 3       | Demo_human            | Finished |             | <input checked="" type="checkbox"/> |
| 1       | 1               | 1       | demo search           | Finished |             | <input checked="" type="checkbox"/> |

Left menu bar:

- LTQ\_DEMO Search Tasks
- LTQ\_DEMO New Task
- LTQ\_DEMO Task Finder
- Running Task Status
- View Search Log
- View TPP Log
- View Parser Log

## ⇒ Select "LTQ\_Demo New Task"

This opens up a new page. Enter a Task Name of your choice, select the search engine(s) and parameter set(s) to be utilized (these can be edited). If needed, an automatic conversion of RAW files to the mgf format used by Mascot or the mzXML format used by X!Tandem will be applied by default. The search can be initiated manually and immediately ("Start Now"), or automatically as files are added every X hours (see below). You have an option of automatically running the TPP statistical software tools on the search results. If you choose to do so, select the "Run TPP" box. Note that you can also run the TPP tools after you get the search results. (Running TPP manually post-acquisition is a more flexible option, because it allows you to combine several files into a single TPP analysis).

The screenshot displays the ProHits MS Data Management interface. The main window is titled "LTQ Search Task" and contains several configuration sections:

- Task Name:** A text input field.
- Folder ID, Folder Name, Project:** A table with three columns.
- Search Engine Parameter Set:** A section for selecting search engines. "Mascot" is checked with the parameter set "demo\_human". "The GPM" is unchecked with the parameter set "human".
- Run TPP:** A checkbox that is currently unchecked.
- TPP Name and TPP Parameter set:** Text input fields and a dropdown menu.
- Xcalibur Parameter:** A section for parameters required for converting LTO raw files to mgf files for Mascot, with the value "-B300 -T5000 -I10 -S1 -G1 -M0.1".
- Search schedule:** A section for scheduling the task, with "Start Now" selected and "Start Every" set to "12" hours.
- Data Files (total: 0):** A section for adding data files, with an "Automatically add" checkbox and a list of files.

A blue arrow points from the "demo\_human" dropdown in the Search Engine Parameter Set section to a detailed view of the "Mascot Parameters" dialog box. This dialog box is titled "(MATRIX) (SCIENCE) Mascot Parameters" and is used to create or modify Mascot search parameter sets. It contains the following fields:

- Your name:** frank liu
- Email:** gliu@mslri.on.ca
- Search title:** demo human
- Database:** Human\_RefseqV33
- Taxonomy:** All entries
- Enzyme:** Trypsin
- Allow up to:** 1 missed cleavages
- Fixed modifications:** Acetyl (K), Acetyl (N-term), Acetyl (Protein N-term), Amidated (C-term), Amidated (Protein C-term)
- Variable modifications:** Cation-Na (C-term), Cation-Na (DE), Deamidated (NQ), Dehydrated (N-term C), Dehydro (C)
- Quantitation:** None
- Peptide tol.:** 3 Da, #<sup>13</sup>C: 0, MS/MS tol.: 0.6 Da
- Peptide charge:** 2+ and 3+
- Monoisotopic:** Average
- Data format:** Mascot generic
- Precursor:** m/z
- Instrument:** ESI-TRAP
- Error tolerant:**
- Decoy:**
- Report top:** 200 hits

At the bottom of the dialog box, there are buttons for "Save", "Reset", and "Close". The "Parameter Set" section shows "New Set" selected, "Set by: Prohits Administrator", and "Set date: 2010-01-06". The "Set name" is "demo\_human" and the "for Project" is "Demo Human Gel Free".



## Manually initiate searches

⇒ To manually initiate a search, select the "Start Now" option, and click the "Add Files" button located on the bottom right

This will open the folders for the specified instrument, allowing you to select as many files as desired for searching.

Each user can only have one running task per machine; additional tasks (unlimited number) will be placed in a queue. The search will automatically initiate (in the order they were queued) once the initial searches are completed.

Once all parameters are selected, and the files transferred, click the "Run Task" button at the bottom of the screen.

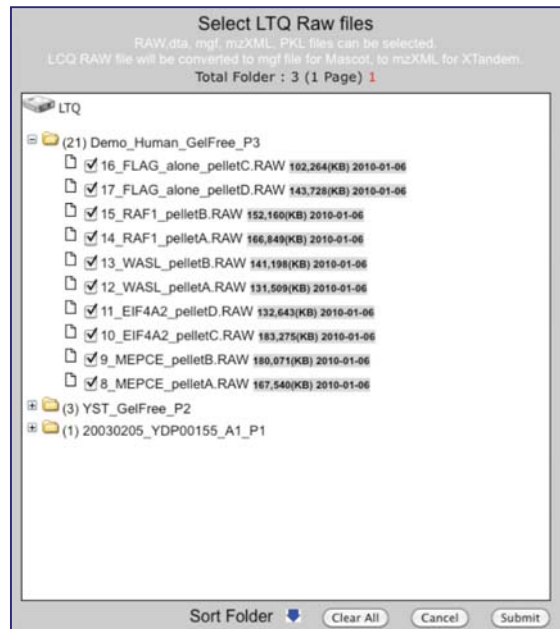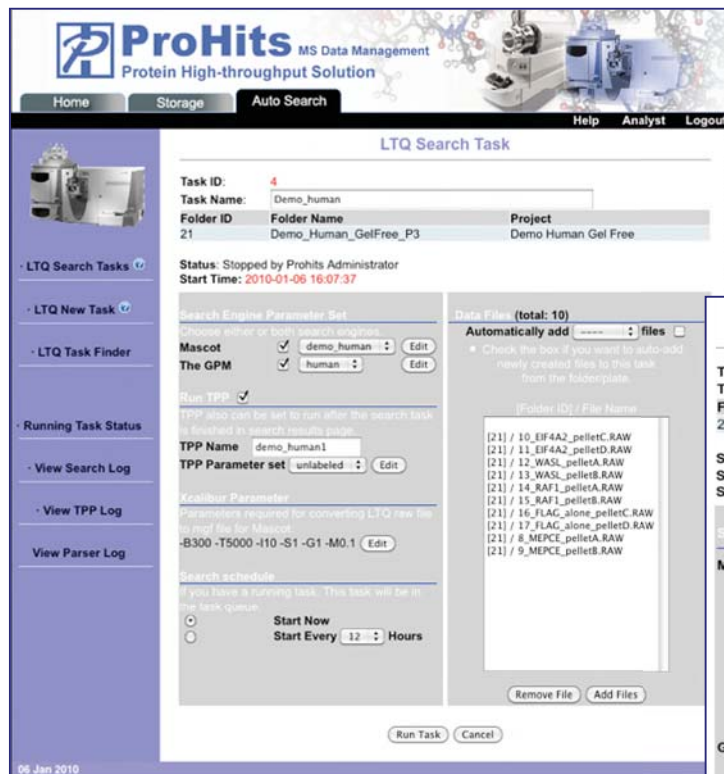

Once the task is running, the search parameters will be locked. Tip: instead of creating a new search task for each file you analyze using the same search parameters, use the "Modify Task" option at the bottom of the page: this will group all your searches within the same search task folder, making it easier to retrieve, and will also ensure that the same search parameters are used for each file. Clicking [Modify Task] allows you to add files to be searched with the same parameters, but not to change the search parameters. To research the same raw files with different search parameters, a New Task must be created.

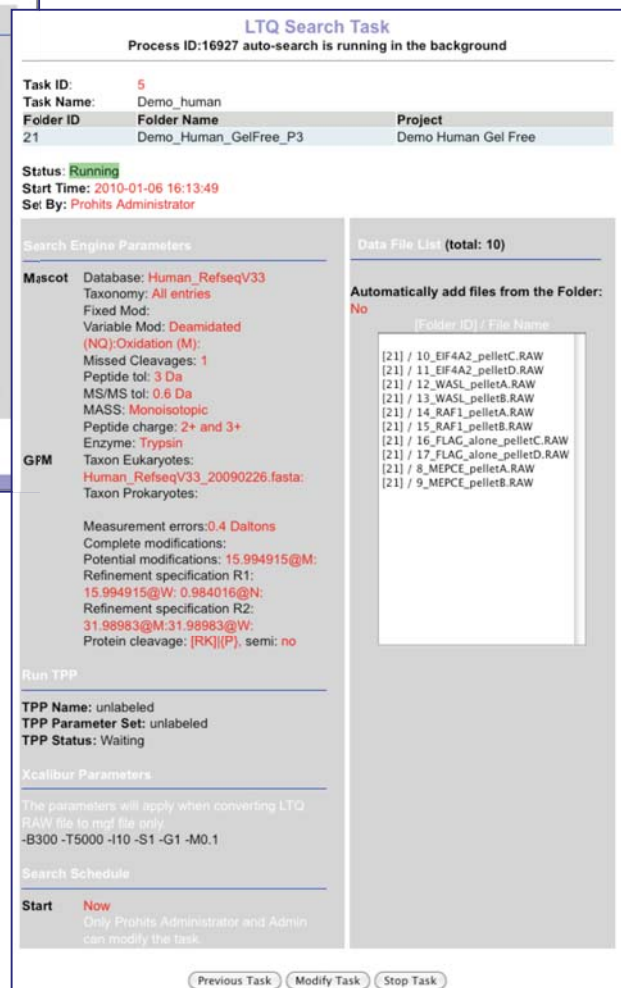

## Automatically initiate searches

For some high-throughput projects, users may want to **automatically initiate searches** on every new file added to the folder(s) that are initially selected for the search. Before you can select to automatically add files and search them, you have to point to at least one file in a folder manually, as indicated above. By selecting the "Start every X hours" (left hand side), and "Automatically Add Files" (right side) options, every file of the selected format subsequently acquired within the same folder(s) or subfolder(s) will be automatically searched using the same parameters.

## Search Task view

⇒ **Select the LTQ\_DEMO "Search Tasks" option on the left side**

This opens the page listing the searches performed on this instrument. Searches still running will be highlighted in green.

**ProHits** MS Data Management  
Protein High-throughput Solution

Home Storage **Auto Search** Help Analyst Logout

**LTQ\_DEMO Search Tasks**

Project Name ID  
Demo Yeast Gel 1  
Demo Yeast Gel Free 2  
Demo Human Gel Free 3

[List Search Results by Folder]  
Total : 4 (1 Page) 1

| Task ID | Analyst PlateID | Project | Task Name             | Status   | Task Detail | Result Detail                       |
|---------|-----------------|---------|-----------------------|----------|-------------|-------------------------------------|
| 7       | 1               | 1       | Gel_based demo search | Finished |             | <input checked="" type="checkbox"/> |
| 6       | 0               | 2       | yeast_demo_search     | Finished |             | <input checked="" type="checkbox"/> |
| 5       |                 | 3       | Demo_human            | Finished |             | <input checked="" type="checkbox"/> |
| 1       | 1               | 1       | demo seach            | Finished |             | <input checked="" type="checkbox"/> |

[List Search Results by Folder]  
Total : 513 (11 Pages) 1 2 3 4 5 6 7 8 9 10 11

| Task ID | Analyst PlateID | Project | Task Name                                                                                                   | Status               | Task Detail | Result Detail                       |
|---------|-----------------|---------|-------------------------------------------------------------------------------------------------------------|----------------------|-------------|-------------------------------------|
| 578     |                 | 32      | yst search<br>The task was set to run. But it is not running. Click task detail to stop it or run it again. | Error                |             | <input checked="" type="checkbox"/> |
| 579     |                 | 32      | se test                                                                                                     | In task queue        |             | <input checked="" type="checkbox"/> |
| 577     |                 | 32      | queue gpm                                                                                                   | Finished             |             | <input checked="" type="checkbox"/> |
| 576     |                 | 32      | queue                                                                                                       | Stopped by Frank Liu |             | <input checked="" type="checkbox"/> |
| 575     |                 | 32      | large file mml                                                                                              | Finished             |             | <input checked="" type="checkbox"/> |
| 574     |                 | 32      | cluster test                                                                                                | Finished             |             | <input checked="" type="checkbox"/> |

Other important status information can also be obtained in Search Tasks view. While green indicates a file being actively searched, a blue colour indicates that a sample is currently in the queue. Yellow highlights an error with the search. No other searches can be initiated until this problem is resolved, either through successful running of the problematic search, or by stopping the task. **IMPORTANT:** If an error is encountered while tasks are in the queue, one of these tasks must be manually re-started (the other Tasks will then be searched in queue).

⇒ **Clicking on the Task Detail icon in the column will open up the same status page as shown on page 9.**

⇒ **To obtain the results, click on the "Result Detail" icon at the extreme right of the table.**

## View Search Results

⇒ Select the "Result Detail" for one search task

This opens up a new page.

The search results are displayed at the bottom of the page. The blue link will connect to the search engine page.

**Note that if using the Demo sites from external computers, you will not be able to view the results from the search engines (firewall protection).**

This page also provides you with

- 1) list of the other Task IDs associated with this folder
- 2) the option of analyzing your search results using the TPP (either for single files or for merged files)
- 3) the possibility to link files to the Analyst module
- 4) the file parsing tool that allow you to transfer your search results to the Analyst module.

**LTQ\_DEMO Search Results**

**Task ID:** 5  
**Task Name:** Demo\_human  
**Folder ID**    **Folder Name**    **Project**

| Folder ID | Folder Name                 | Project             |
|-----------|-----------------------------|---------------------|
| 21        | Demo_Human_GelFree_P3 0(MB) | Demo Human Gel Free |

**Status:** Finished  
**Start Time:** 2010-01-07 19:50:19  
**Set By:** Prohits Administrator

| Task ID           | Task Name  | Search Engine                   | Schedule | Status                           |
|-------------------|------------|---------------------------------|----------|----------------------------------|
| <a href="#">5</a> | Demo_human | Mascot=demo_human;<br>GPM=human | Now      | Finished                         |
| <a href="#">4</a> | Demo_human | Mascot=Yeast;GPM=YST            | Now      | Stopped by Prohits Administrator |

**Set Search Results to Run TPP** [\[ New \]](#)

| TPP ID                    | TPP Name | Parameter Set | Status   | Set By                |
|---------------------------|----------|---------------|----------|-----------------------|
| <a href="#">3</a> [ log ] | demo1    | unlabeled     | Finished | Prohits Administrator |

**Parse Hits to Prohits Analyst database** [\[ Detail \]](#)

**Parse Hits Status:** not saved  
**Parsed By:**

Reload

| File ID | [Folder ID] / File Name      | Size(KB) | Search Results      | TPP                                               |
|---------|------------------------------|----------|---------------------|---------------------------------------------------|
| 22      | [21] / 8_MEPCE_pelletA.RAW   | 167,540  | <a href="#">GPM</a> | <a href="#">pepXML</a><br><a href="#">protXML</a> |
| 23      | [21] / 9_MEPCE_pelletB.RAW   | 180,071  | <a href="#">GPM</a> | <a href="#">pepXML</a><br><a href="#">protXML</a> |
| 24      | [21] / 10_EIF4A2_pelletC.RAW | 183,275  | <a href="#">GPM</a> | <a href="#">pepXML</a><br><a href="#">protXML</a> |
| 25      | [21] / 11_EIF4A2_pelletD.RAW | 132,643  | <a href="#">GPM</a> | <a href="#">pepXML</a><br><a href="#">protXML</a> |

## Running the TPP after completion of searches and merging samples prior to TPP analysis

To add new results files to be analyzed with the TPP to an existing TPP task, click

the icon in the "Status" column of the box [Set Search Results to Run TPP]. You can simply click on the boxes that will appear in the TPP column of the results tables. When desired files are selected, press [Run TPP]. To create a completely new TPP task (e.g. if the TPP parameters have changed), click [New], select desired parameter set and desired files and press [Run TPP].

**Set Search Results to Run TPP** [\[ New \]](#)

| TPP ID                    | TPP Name | Parameter Set | Status               | Set By                |
|---------------------------|----------|---------------|----------------------|-----------------------|
| <a href="#">5</a> [ log ] | demo     | unlabeled     | Finished             | Prohits Administrator |
|                           |          | ---           | <a href="#">Edit</a> |                       |

Merges together search result files --- [\[ Select Files \]](#)

Run TPP    Reset    Cancel

There are cases where you may want to merge files prior to running the TPP (examples include fractionated samples, gel-based or otherwise). This is a simple process in ProHits. The two requirements are that the searches be performed using the same search engine (Mascot and X!Tandem files cannot be combined) and that the results are located within the same Search Task folder. Select the "Merge" option and the files to be combined.

Selecting the "Merge" option will create a new entry at the bottom of the page. The TPP can be run on this entry in the same fashion as on individual files, by selecting the desired parameters and pressing "Run TPP".

At this point, we have performed database searching and have obtained results directly from the search engines, as well as results from the TPP pipeline. We are now ready to transfer these search results into the "Analyst" module.

**The transfer involves two steps: 1) linking the initial file to an entry created in the Analyst module; and 2) parsing the search results.**

## Linking files to Analyst

⇒ [link the file](#)

You may have already linked the native file (not searched) to the Analyst modules through the "Storage" area. If so, the "link" icon by the file size will be coloured.

**LTQACG Search Results**

Task ID: 107  
 Task Name: test\_TPP  
 Folder ID: 317 Folder Name: acg\_Nov07\_network 374(MB) Project: Gingras\_Lab\_Public

Status: Finished  
 Start Time: 2008-05-23 15:25:19  
 Set By: Frank Liu

| Task ID | Task Name | Search Engine                      | Schedule | Status   |
|---------|-----------|------------------------------------|----------|----------|
| 200     | for demo  | Mascot=flag_RefSeq                 | Now      | Finished |
| 107     | test_TPP  | Mascot=flag_RefSeq;GPM=GPM_RefSeq1 | Now      | Finished |
| 24      | sike      | Mascot=acg_IPI                     | Now      | Finished |

Set Search Results to Run TPP [ New ]

| TPP ID    | TPP Name | Parameter Set | Status   | Set By              |
|-----------|----------|---------------|----------|---------------------|
| 1 [ log ] | test     | Gingras_MML   | Finished | Anne-Claude Gingras |

Parse Hits to Prohits Analyst database [ Detail ]

Parse Hits Status: not saved  
 Parsed By:

| File ID | [Folder ID] / File Name             | Size(KB) | Search Results | TPP               |
|---------|-------------------------------------|----------|----------------|-------------------|
| 320     | [317] / F_PPP2CAwt17_a_20071112.RAW | 136,475  | GPM            |                   |
| 320     | [317] / F_PPP2CAwt17_a_20071112.RAW | 136,475  | Mascot         | pepXML<br>protXML |

A white link indicates that no link has been established at this point, as in the example above.

See page 6 for details about manual and automatic link creation.

## Parsing files to the Analyst module

You are now ready for parsing (transferring results to the Analyst module), as you have a linked file () and search results. In this case you also have TPP results. Both types of results can be parsed.

⇒ Select the "Detail" link in the parsing area

**Parse Hits to Prohits Analyst database**
[\[ Detail \]](#)

**Parse Hits Status:** not saved

**Parsed By:**

**Pre-defined Filter Set:** default [\[Save As\]](#)

Parse Results from  GPM/Mascot  TPP  Both GPM/Mascot and TPP

**Mascot**

Ions score cut-off <:

Require bold red peptide :

Save Protein Score > save all hits

Max. number of hits :

Significance threshold p <:

**GPM**

Ions expect log(e) cut-off > -1 0

Save Protein expect log(e) < -1 0

**TPP**

TPP\_PARSE\_MIN\_PROBABILITY = 0.05

| File ID | [Folder ID] / File Name     | Size(KB)                                                                                    | Search Results <input checked="" type="checkbox"/> | TPP <input checked="" type="checkbox"/>                                                   |
|---------|-----------------------------|---------------------------------------------------------------------------------------------|----------------------------------------------------|-------------------------------------------------------------------------------------------|
| 22      | [21] / 8_MEPCPE_pelletA.RAW | 167,540  | GPM <input checked="" type="checkbox"/>            | pepXML <input checked="" type="checkbox"/><br>protXML <input checked="" type="checkbox"/> |
| 23      | [21] / 9_MEPCPE_pelletB.RAW | 180,071  | GPM <input checked="" type="checkbox"/>            | pepXML <input checked="" type="checkbox"/><br>protXML <input checked="" type="checkbox"/> |

You can transfer (parse) results from the search engines (GPM/Mascot), from the TPP or both. You can select the parameters for the parsing cut-off for Mascot and X!Tandem/GPM search engines. For the TPP, all hits with a probability greater than the cut-off selected by the administrator in the Prohits configuration file (we are using  $P > 0.05$ ) are automatically parsed. Check the [select all] box at the top of the appropriate column or manually select files to be transferred to the Analyst module.

⇒ Press "Run" to initiate parsing

The "processing" status notification will appear.

When parsing is successfully completed, a green check mark will appear in the results column.

| Parse Hits to Prohits Analyst database <span style="float: right;">[ Detail ]</span> |                              |                                                                     |                |                   |
|--------------------------------------------------------------------------------------|------------------------------|---------------------------------------------------------------------|----------------|-------------------|
| <b>Parse Hits Status:</b>                                                            |                              | Completed 2010-01-13 11:01:36                                       |                |                   |
| <b>Parsed By:</b>                                                                    |                              | Prohits Administrator <span style="float: right;">[ Detail ]</span> |                |                   |
| Reload                                                                               |                              |                                                                     |                |                   |
| File ID                                                                              | [Folder ID] / File Name      | Size(KB)                                                            | Search Results | TPP               |
| 22                                                                                   | [21] / 8_MEPCE_pelletA.RAW   | 167,540                                                             | GPM            | pepXML<br>protXML |
| 23                                                                                   | [21] / 9_MEPCE_pelletB.RAW   | 180,071                                                             | GPM            | pepXML<br>protXML |
| 24                                                                                   | [21] / 10_EIF4A2_pelletC.RAW | 183,275                                                             | GPM            | pepXML<br>protXML |

In the event that you decide to link or parse different file(s) to the same Analyst entry, you can remove the parsed files or the link: Alongside the tick box, the icon can be selected if you want to remove the hits from the Analyst module. Note that you can also unlink a sample by clicking on the or and selecting "remove link".

## Other options

You have now completed the basic tour of the Data Management module. The following few pages will explore a few other options within the Data Management module: 1) Creating activity reports; 2) Searching for ("fetching") files; 3) Basic troubleshooting of the Data Management module.

The first few options are accessed from the "Storage" page:

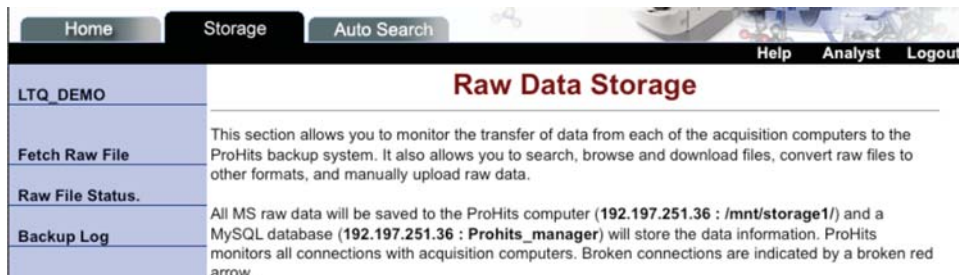

## Creating activity reports for the RAW files

⇒ From the storage tab, select the "Raw File Status" option

This opens up a new window (here we are simply showing one of the SLRI instruments as an example).

⇒ Select the instrument you want the report on, the dates of the report and time units, as well as the contents and style of the display

You could also choose to get the report for all instruments linked to ProHits.

⇒ Press "show" to visualize selected display

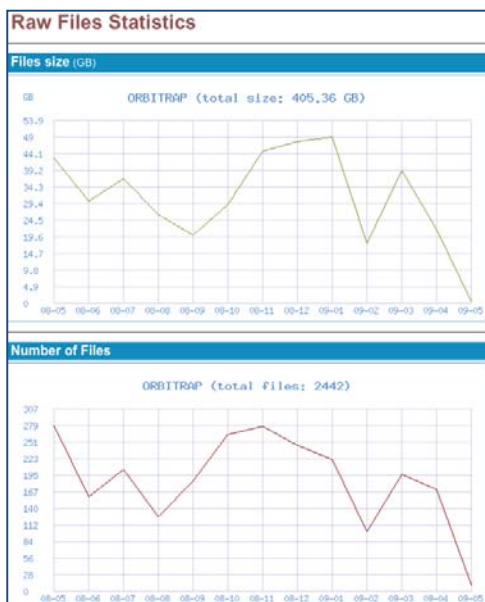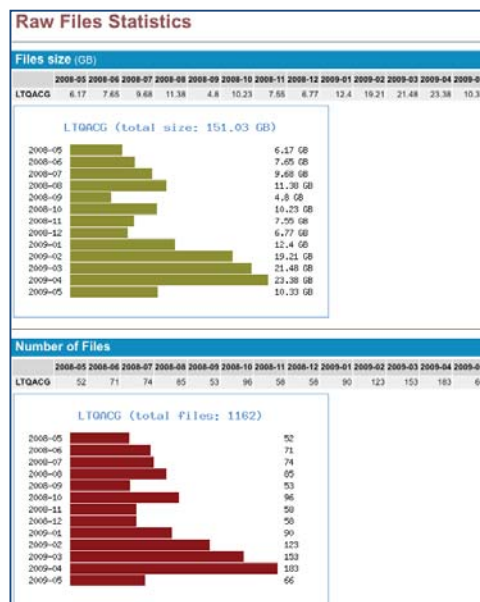

## Searching for files and retrieving RAW data

### ⇒ Select "Fetch Raw File"

This will open a new window. Select the desired instrument (or all instruments), dates if applicable, as well as keywords that are part of the file name (note that you can perform logical operations). Press [Fetch] to retrieve results.

The "Options" in the last column allow you to download () the data (.RAW , .mzXML or .mgf) onto your computer, and to open the parent folder ().

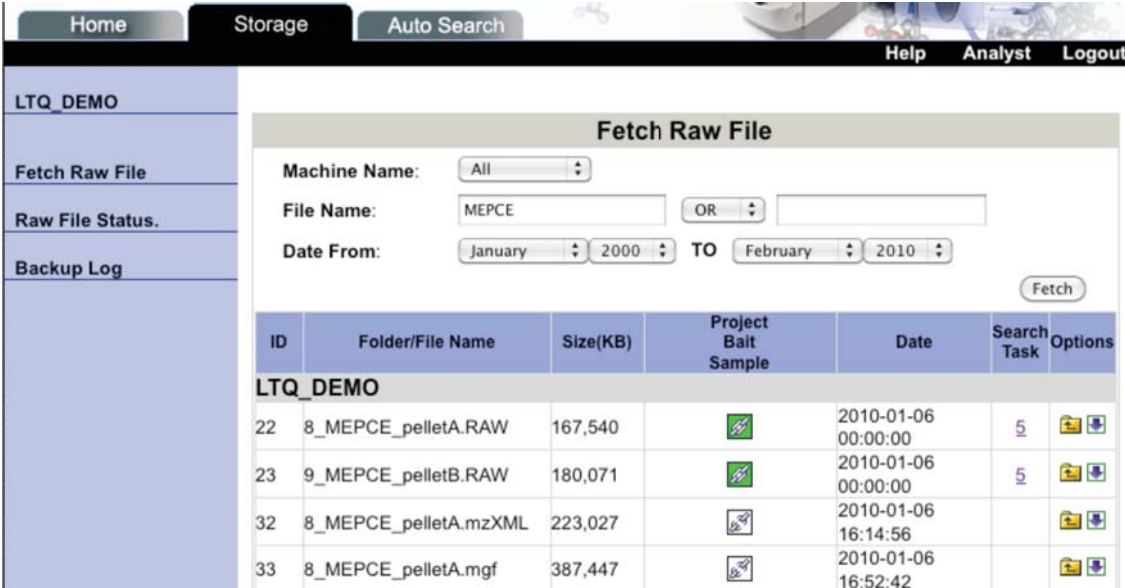

| ID              | Folder/File Name      | Size(KB) | Project Bait Sample                                                                 | Date                | Search Task | Options                                                                                                                                                                     |
|-----------------|-----------------------|----------|-------------------------------------------------------------------------------------|---------------------|-------------|-----------------------------------------------------------------------------------------------------------------------------------------------------------------------------|
| <b>LTQ_DEMO</b> |                       |          |                                                                                     |                     |             |                                                                                                                                                                             |
| 22              | 8_MEPCE_pelletA.RAW   | 167,540  |   | 2010-01-06 00:00:00 | 5           |     |
| 23              | 9_MEPCE_pelletB.RAW   | 180,071  |  | 2010-01-06 00:00:00 | 5           |   |
| 32              | 8_MEPCE_pelletA.mzXML | 223,027  |  | 2010-01-06 16:14:56 |             |   |
| 33              | 8_MEPCE_pelletA.mgf   | 387,447  |  | 2010-01-06 16:52:42 |             |   |

⇒ To retrieve the searched results, you can click the search task number in the "Search Task" column.



## Basic Troubleshooting of the Data Management module

ProHits Data Management requires a connection between all of your acquisition computers, the search engine computers(s) and the storage computer. To facilitate the detection of broken links between these computers, ProHits has implemented an easy visual guide, both in the storage and auto search modules.

⇒ From the Data Management entry page, select the "Storage" tab

As before, all of the instruments in the facility are listed. The green arrows indicate that the connection between each instrument and the storage area is functional. If an automated backup has been selected, this also indicates that the backup was performed on schedule. Note that there is a broken connection between one of the instruments and the storage computer, easily identified by a broken orange arrow (in this case, the computer was offline for maintenance). Notify the ProHits administrator when you detect such arrows.

⇒ Click on the "Backup" log (left side of the screen, toward bottom) to monitor the transfer of data from the acquisition computers to the storage computers and to read any error messages

### Log File 'raw\_back.log'

Display last :  lines

```

10089 end of QSTARELITE 2009-05-22 8:04:27
10088 copied 6: /mnt/QSTARELITE/1_AJ/2009_05_20_Grb2_iTRAQ_op/Data
10087 process QSTARELITE 2009-05-22 8:03:36
10086 Backup QSTARELITE start at 2009-05-22 8:03:36
10085 PSID:3771 QSTARELITE
10084 end of 4000QTRAP2 2009-05-21 23:07:01
10083 copied 2: /mnt/4000QTRAP2/Andrew_J/2009_05_20/Data
10082 copied 1: /mnt/4000QTRAP2/Andrew_J/2009_05_20/Batch
10081 process 4000QTRAP2 2009-05-21 23:07:00
10080 end of 4000QTRAP2 2009-05-21 23:07:00
10079 copy 6: /mnt/4000QTRAP/CJ_Yong/2009_05_07_0430ShcA/Data/0430ShcA_R_21
10078 copied 20: /mnt/4000QTRAP/CJ_Yong/2009_05_07_0430ShcA/Data/0430ShcA_r
10077 copied 1: /mnt/4000QTRAP/CJ_Yong/2009_05_07_0430ShcA/Batch
10076 copied 1: /mnt/4000QTRAP/CJ_Yong/2009_05_07_0430ShcA/Acquisition Meth
10075 process 4000QTRAP 2009-05-21 23:06:51
10074 end of QSTARELITE 2009-05-21 23:06:51
10073 copy 0: /mnt/QSTARELITE/Tempo Method Maker/Project Information/eventl
10072 copy 1: /mnt/QSTARELITE/Tempo Method Maker/Project Information/eventl
10071 copy 1: /mnt/QSTARELITE/Tempo Method Maker/BioAnalyst
10070 copied 10: /mnt/QSTARELITE/1_AJ/2009_05_20_Grb2_iTRAQ_op/Data
10069 copied 2: /mnt/QSTARELITE/1_AJ/2009_05_20_Grb2_iTRAQ_op/Batch
10068 process QSTARELITE 2009-05-21 23:05:15
10067 end of LTQXL 2009-05-21 23:05:15
10066 copied 1: /mnt/LTQXL/Yasmina_P36
10065 process LTQXL 2009-05-21 23:05:05
10064 end of ORBITRAP 2009-05-21 23:05:05
10063 copied 10: /mnt/ORBITRAP/Fal108dev
10062 copied 1: /mnt/ORBITRAP/Ek Install Data
10061 process ORBITRAP 2009-05-21 23:04:27
10060 end of LTQACG 2009-05-21 23:04:27
10059 copied 3: /mnt/LTQACG/MM_IP_LCMS
10058 process LTQACG 2009-05-21 23:04:01
10057 end of LTQMT 2009-05-21 23:04:01
10056 process LTQMT 2009-05-21 23:04:01

```

The same visual display and log details are also found in the AutoSearch module.

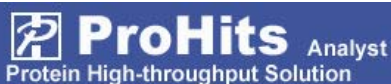

## ProHits Analyst

### User manual - demo

Version demo1, prepared on Jan 15, 2010, by Anne-Claude Gingras, with the help of Frank Liu, JP Zhang, Brian Raught, Brett Larsen, Wade Dunham, Marilyn Goudreault and Karen Colwill.

## Contents

|                                                                                            |    |
|--------------------------------------------------------------------------------------------|----|
| Overview.....                                                                              | 2  |
| Access to projects .....                                                                   | 3  |
| Analyst main page .....                                                                    | 4  |
| Description of the navigator bar options:.....                                             | 4  |
| Creating samples and viewing individual reports .....                                      | 5  |
| Adding a "Gel-Free" sample .....                                                           | 5  |
| Creating a bait.....                                                                       | 5  |
| Creating an experiment .....                                                               | 8  |
| User-defined free-text protocols .....                                                     | 8  |
| Controlled vocabulary .....                                                                | 8  |
| Additional annotation.....                                                                 | 8  |
| Creating a new sample .....                                                                | 11 |
| Linking raw files from the Data Management module .....                                    | 12 |
| Linking raw files directly from the Analyst module (alternative) .....                     | 12 |
| Navigating through the results .....                                                       | 15 |
| Search results.....                                                                        | 15 |
| Sorting options .....                                                                      | 16 |
| Links details .....                                                                        | 16 |
| Option details .....                                                                       | 16 |
| Using filters .....                                                                        | 17 |
| Comparing your data to literature interactions .....                                       | 19 |
| View and navigate hits from the TransProteomics Pipeline.....                              | 20 |
| Viewing results using Cytoscape .....                                                      | 21 |
| Export Sample report .....                                                                 | 21 |
| Using the Notes option.....                                                                | 22 |
| Creating gel-based samples .....                                                           | 23 |
| Adding a "Gel-based" sample .....                                                          | 23 |
| The Comparison tool .....                                                                  | 26 |
| Merging files prior to Comparison .....                                                    | 27 |
| Comparison page .....                                                                      | 29 |
| Using Cytoscape directly from ProHits comparison.....                                      | 31 |
| Other export options .....                                                                 | 32 |
| Comparing larger numbers of baits .....                                                    | 33 |
| Automatically adding baits for comparison from the baits or sample report list pages ..... | 34 |
| Simple Search (Gene name) .....                                                            | 35 |
| Other keywords that can be searched: .....                                                 | 37 |
| Manage Protocols and Lists .....                                                           | 41 |
| Text-based protocols .....                                                                 | 42 |
| Experimental Editor.....                                                                   | 44 |
| Background Lists.....                                                                      | 46 |
| Group Lists.....                                                                           | 49 |
| Export version .....                                                                       | 51 |
| Epitope Tag Lists.....                                                                     | 52 |

## Overview

The Analyst module allows you to visualise, analyze, compare, search and export your MS results.

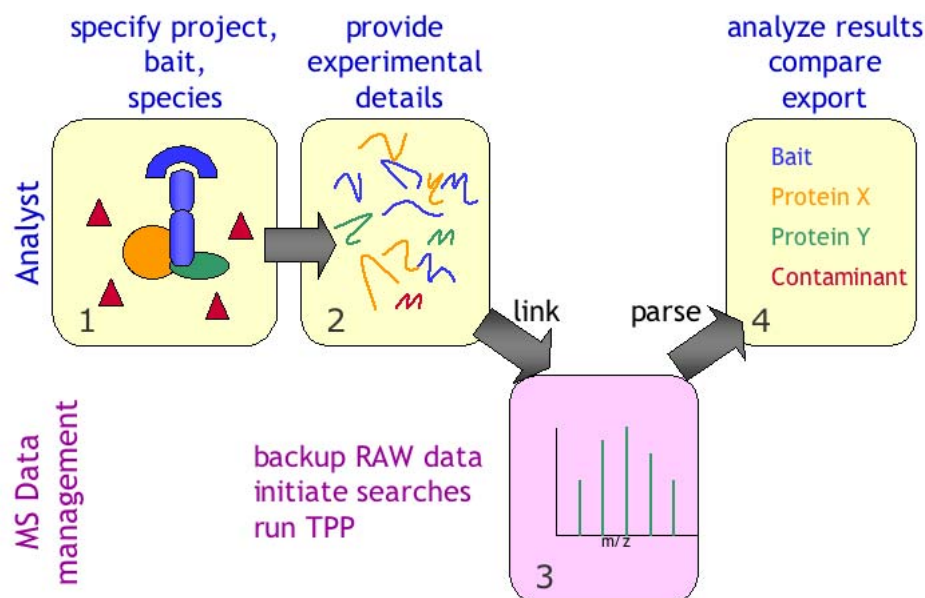

In order to analyze and compare data, each MS file in the MS data management module must be linked to a sample created in the Analyst module. For example, to create a sample for a gel-free experiment, you must first specify a project, create an entry for the protein of interest (bait), and define experimental conditions. Typical gel-free samples are eluates from an affinity purification.

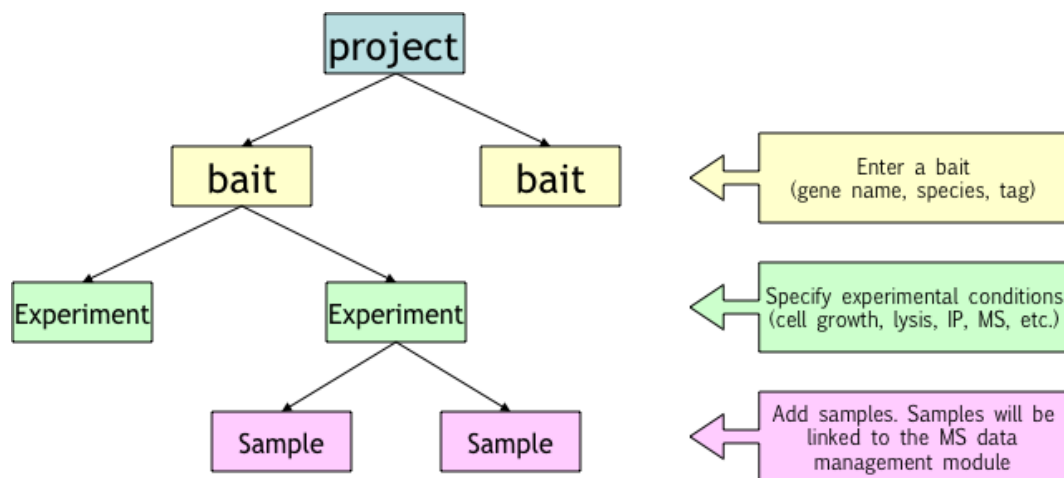

Sample entry for gel-based projects is similar, with the exception that a gel is specified prior to the selection of a bait. Typically, samples are gel bands, and all bands from the same lane are entered under the same "Experiment".

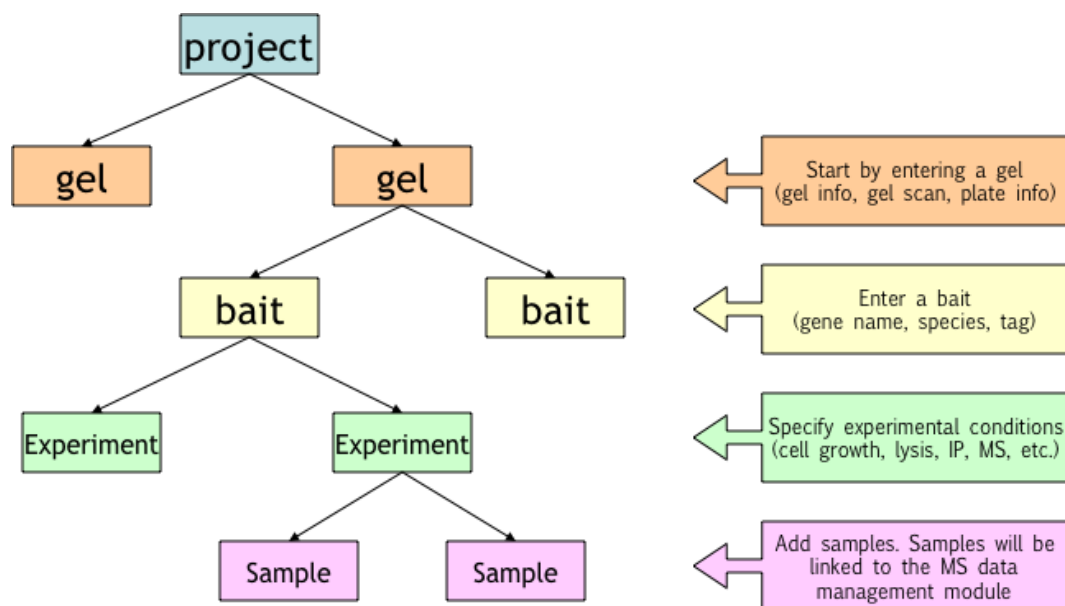

### Access to projects

Projects are created by your administrator in the "Admin Office" ProHits module, and access is granted to users. Projects can be specific to a research group or an individual, to a given organism or specific methodology, etc. The creation of a new project is defined in the "Admin Office" manual.

When you log into ProHits with your user name, you can see the list of all of the projects that you have access to. You may have different privileges for each project.

### fi Highlight the desired project, then hit "Select"

## Analyst main page

When you enter a project within the Analyst module, you will see the data workflow and a summary of the icons used in this module. The navigator bar on the left lists various visualization and analysis options.

The screenshot displays the ProHits Analyst interface. At the top, it shows the user as 'ProHits Administrator' and the project as 'Demo Human Gel Free'. The main content area features a 'Database structure' diagram with two columns: 'Analyst' and 'Data Management'. The 'Analyst' column shows a hierarchy: Project (orange) -> Bait (orange) -> Experiment (orange) -> Sample (orange). The 'Data Management' column shows: Mass spectrometer (green) -> RAW file (green) -> Search task (green) -> Search results (green). A 'data parsing' box (orange) is connected to the 'Sample' and 'Search results' nodes. Below the diagram is an 'Icons' section with a list of actions and their corresponding icons: Modify, Delete, Next Level, Picture, Plate, Next, and Co-IP. A red arrow points from a text box 'description of some of the icons used in this module' to the 'Icons' section. Another red arrow points from a text box 'visualization and analysis options' to the left-hand navigator bar.

**Database Information (Project: Demo Human Gel Free)**

Database structure

Analyst

Project

Bait Bait

Experiment Experiment

Sample Sample

Data Management

Mass spectrometer

RAW file

Search task

file conversion  
search parameters  
TPP parameters

Search results

data parsing

Icons

Modify -- Click [icon] to modify a record.

Delete -- Click [icon] to delete a record. You can only delete your own records.

Next Level -- Click [icon] to go to next level of a record.

Picture -- Click [icon] to leave a pop-up window to show up and display a gel image.

Plate -- Click [icon] to view the current plate.

Next -- Click [icon] to go to next step when submitting samples.

Co-IP -- Co-IP results: Yes [icon] No [icon] Possibility [icon] In Progress [icon]

description of some of the icons used in this module

visualization and analysis options

### Description of the navigator bar options:

- 1- **Create New Entry** allows you to define a bait, experiment, sample, and to link mass spectrometry data to this entry. These entries can then be linked to specific files in the MS Data Management module. Alternatively, you can upload search results created by external software.
- 2- **Individual Reports** allows you to explore your mass spectrometry results. *Report by Bait*: provides a list of all baits entered in the database for this project. *Report by Samples*: lists all samples entered for this project (a bait may be linked to multiple samples, especially in gel-based projects; we also use this nomenclature for technical replicates). *Report by Plate*: sample tracking for high-throughput projects, typically gel-based. *Report by Gel*: allows you to visualize results for each gel (gel-based projects only).
- 3- **Multiple Sample Analysis (Comparison)**: allows you to simultaneously visualize multiple result pages.
- 4- **Manage Protocols and Lists** allows you to create and maintain experimental protocols, controlled vocabularies, background lists, group lists and epitope tag lists. Access to these pages is defined by the ProHits Administrator.
- 5- **Other Tools** provides additional functionality. *Co-IP Report*: allows you to input results from follow-up experiments aimed at confirming interaction pairs by immunoprecipitation/immunoblotting. *Export Functions*: allows you to export filtered or unfiltered lists of mass spectrometry results. Note that export functions are also available within each of the Individual Report or Comparison pages.
- 6- **Advanced search** allows you to query your project for genes, keywords and/or controlled vocabularies.

## Creating samples and viewing individual reports

To learn more about the different functions of ProHits Analyst, we will navigate through the Analyst module by creating new baits and linking them to entries from the Data management system. We will then explore the functions available in the Analyst module. We will go through the process of adding a gel-free sample and explore the results for this type of project. We will then briefly review the differences between submitting gel-free and gel-based samples.

### Adding a "Gel-Free" sample

To create a new sample to be linked to a search result file, you will first specify a bait, then an experiment, and then a sample. To submit a sample, you have two options: 1) create a new sample from an existing bait; or 2) create a new bait. Here we will start by creating 5 new baits for this project.

#### Creating a bait

fi Select the "Add Gel-free Sample" link under "Create New Entry". Select "new bait" from the dropdown menu, then click on the "Bait" Blue arrow.

The screenshot displays the ProHits Analyst web interface. At the top, the logo reads "ProHits Analyst Protein High-throughput Solution" and the current user is identified as "Prohits Administrator". A navigation sidebar on the left includes links for Home, Create New Entry (with sub-links for Add Gel-free Sample and Add Gel-based Sample), Upload Search Results, and Individual Reports (with a sub-link for Report by Bait). The main content area is titled "Add Gel-free Sample (Project: Demo Human Gel Free)". A workflow diagram illustrates the process: a blue arrow labeled "Bait" leads to a green arrow labeled "Experiment", which leads to another green arrow labeled "Sample". From "Sample", two paths emerge: one leading to a green arrow labeled "Link raw file" and another leading to a green arrow labeled "Upload Search Results". Both paths then lead to a green arrow labeled "Search raw file", which finally leads to a green arrow labeled "Parse Hits". A red callout box points to the "Bait" arrow with the text "Click this arrow to add gel-free sample". Below the "Bait" arrow is a "Start from:" dropdown menu currently set to "new bait".

This will open a new page. Note at the top of the page the data structure; the Bait is highlighted, indicating that you are adding bait level entries. Note that each of the baits is automatically assigned a unique numeric identifier. The fields highlighted in bold indicate that the information is mandatory, but many of these can be filled automatically.

The easiest way to enter a new bait is to simply 1) select the desired species (here we have selected *Homo sapiens*); 2) enter an official Gene Name (HUGO for human; here we selected MEPCE); 3) click the "Get Protein Info" green button. Clicking "Get Protein Info" automatically retrieves the protein information which is displayed in a new window. Verify this information and hit [Pass Value] if correct – the information will automatically be transferred. **Note that if there is more than one entry mapped to a given gene, the user can select which one is to be parsed into ProHits.**

ProHits also allows you to indicate which epitope-tag you are using, by selecting from options in the "Epitope Tag" menu; you can also add new tags using the "Manage Protocols and Lists" option. If the sequence of the bait is mutated relative to the HUGO sequence, you can also enter this in the "Bait mutation" box.

Bait → Experiment → Sample

Delete Next Level Modify Next Bait Report Bait Notes

**Baits** (Project: Demo Human Gel Free) (Submit Gel Free Sample) [Add New Bait] [Bait List]

New gene for IP experiment  No gene (control) or non IP experiment

Bait ID:   
 Species:   
 Gene Name:  Epitope Tag:  [Detail] Bait Mutation:   
If the bait sequence has been modified/alterd, you can just enter the wild type gene name to get its protein information, then modify the Gene Name as needed and write the modification detail in Description field.  
  
 GeneID:   
 LocusTag:   
This field is ignored if a Gene ID is specified when you click Get Protein Info button  
 ProteinID:   
 ProteinID Type:   
 MW:  kDa  
 Family:   
 Vector:   
 Clone Number:   
 Description:

Specify species, official gene symbol, Epitope tag, and Bait mutation (if applicable)

Click "get protein info"

| Protein Information                                                            |                                                                                                                                                                                                                                         |
|--------------------------------------------------------------------------------|-----------------------------------------------------------------------------------------------------------------------------------------------------------------------------------------------------------------------------------------|
| <b>Gene ID:</b>                                                                | 56257                                                                                                                                                                                                                                   |
| <b>Gene Name:</b>                                                              | MEPCE                                                                                                                                                                                                                                   |
| <b>Gene Alias:</b>                                                             | BCDIN3<br>FLJ20257                                                                                                                                                                                                                      |
| <b>Species:</b>                                                                | Homo sapiens (human)                                                                                                                                                                                                                    |
| <b>Description:</b>                                                            | methylphosphate capping en                                                                                                                                                                                                              |
| <b>Accession:</b>                                                              | NP_062552.2                                                                                                                                                                                                                             |
| <b>GI Number:</b>                                                              | 47271406                                                                                                                                                                                                                                |
| <b>Acc Description:</b>                                                        | AF264752_1 unknown [Homo sapiens]                                                                                                                                                                                                       |
| <b>MW:</b>                                                                     | 24.95 KDa                                                                                                                                                                                                                               |
| <b>Sequence:</b>                                                               | MVGLDIDSRLIHSARQNIHRYLSEELRPPDTLEGDPGAEEGEGTTVRK<br>RSCFPASLTASRGPIAAPQVPLDGADTSVFPNNVVFVTGNYVLDLDRDLVE<br>AQTPEYDVLCLSLTKWVHLNWGDEGLKRMFRRIYRHLRPGGILVLEPQP<br>WSSYGKRLTLETIYKNYRIQLKPEQFSSYLTPDVGFSYELVATPHN<br>TSKGFQRPVYLFHFKARSPSH |
| <input type="button" value="Pass Value"/> <input type="button" value="Close"/> |                                                                                                                                                                                                                                         |

Check information for accuracy, then click "pass value"

#### fi Press [Save] to complete bait entry

After saving, you still have the option to modify the information (a new window appears with two options at the bottom, "Modify" and "Next"). You can add additional information, e.g. in the "Description" field, or modify existing information. Hitting [Next] would bring up the Experimental detail page (for this demonstration, we will not do this yet).

Also note that you can create baits for sequences that are not in the database by manually filling in all bold fields (species, gene name, locus tag, protein ID, protein ID type). ProHits does not check for accuracy in these entries. You may wish to use this option, for example, for recombinant or chimeric proteins not corresponding to any of the entries in the database.

fi Use the [Add New Bait] button at the top of the page, and continue defining baits in the same manner as for MEPCE. Note that in the bait entry page, you can also define an experiment in which no gene/protein was tagged. To do so, simply select the "No gene (control) or non IP experiment" button at the top of the page, and manually enter information. Here we are adding a "FLAG alone" bait.

Bait → Experiment → Sample

Delete Next Level Modify Next Bait Report Bait Notes

**Baits** (Project: Demo Human Gel Free) (Submit Gel Free Sample) [Add New Bait] [Bait List]

New gene for IP experiment  No gene (control) or non IP experiment

Species:   
 Name:  Epitope Tag:  [Detail]  
 Description:

Select this option and fill the appropriate info

fi To visualize the entry of your new baits in the database, go back to the left bar menu and select [Report by Bait]

 Delete  Next Level  Modify  Next  Bait Report  Bait Notes

## Baits (Project: Demo Human Gel Free)

[\[Bait List\]](#)

Column Display Set  

Experiment status color keys [\[+\]](#)

Bait groups [\[+\]](#)

 select to compare

Total Baits : 5 (1 Page) 1

| ID                          | GeneName   | Tag    | ProteinID | User                  | Status | Options                                                                                                                                                                                                                                                     |
|-----------------------------|------------|--------|-----------|-----------------------|--------|-------------------------------------------------------------------------------------------------------------------------------------------------------------------------------------------------------------------------------------------------------------|
| <input type="checkbox"/> 10 | FLAG_alone | N-Flag |           | Prohits Administrator |        |    |
| <input type="checkbox"/> 9  | RAF1       | N-Flag | 4506401   | Prohits Administrator |        |    |
| <input type="checkbox"/> 8  | WASL       | N-Flag | 51702526  | Prohits Administrator |        |    |
| <input type="checkbox"/> 7  | EIF4A2     | N-Flag | 83700235  | Prohits Administrator |        |    |
| <input type="checkbox"/> 6  | MEPCE      | N-Flag | 47271406  | Prohits Administrator |        |    |

Total Baits : 5 (1 Page) 1

The Bait Report now lists the baits we have created (MEPCE, FLAG alone, and 3 additional baits that we will use for the demonstration of the functions of ProHits), along with some relevant information. The "ID" column lists a unique identifier for the bait that is automatically assigned by ProHits. The Gene Name and Tag are indicated, and the Protein ID is the accession number from the selected database (e.g. NCBI-GI). The "User" column is automatically assigned to the user who created the sample (i.e. the person who has signed up in ProHits).

Note that, on many of the ProHits pages, you will find standard icons (as seen at the top of the Bait Report page).

 Delete  Next Level  Modify  Next  Bait Report  Bait Notes

- 1- To remove unused material, press the "delete" icon. The "delete" function may be used to remove baits, experiments or samples, but *only if no information has been entered*. If you wish to delete a bait, experiment or sample for which information has been entered, start by deleting the information at a lower level, and work your way up. (Note that there is an Admin control for the permissions to insert, modify and delete entries, and you can only delete your own entries).
- 2- The next level (tree) icon allows you to navigate down in the data structure (i.e. from bait to experiment to sample).
- 3- The Modify icon allows you to change the information you entered for a bait, experiment or sample.
- 4- The green arrow (Next) icon allows you to submit information and/or exit a page after data has been entered.
- 5- The "Bait report" (graph) icon shows you the mass spectrometry results for the selected bait. We will review this in detail later.
- 6- Finally, the "Bait Notes" (callout) icon allows you to enter specific notes/information for baits or samples. Such notes can be a manually entered discussion point. Other types of notes include assignment of a project to a user-defined "bait group".

Now that you have created baits, you are ready to define your experiments. Note that in many cases, you will be seamlessly going from bait to experiment to sample when entering real samples. Here, we have simply separated these modules for ease of teaching.



## Creating an experiment

### fi Return to [Add Gel-free sample], and select [start from existing bait].

This will bring up essentially the same page as shown above, but with an additional option (green arrow) at the extreme right of each row.

### fi Select this green arrow to enter the experimental details for a given bait

The experimental detail page allows you to specify experimental conditions and protocols used for the experiment. The top of the page states the bait information: below, the definition of an experiment can be separated into three sections.

Bait → Experiment → Sample

[Delete](#) [Next Level](#) [Modify](#) [Next](#)  
**Experiments (Project: Demo Human Gel Free)** [\(Submit Gel Free Sample\)](#) [\[New Experiment\]](#) [\[Experiment List\]](#) [\[Back to Bait\]](#)

| Bait Information |            |                |                       |
|------------------|------------|----------------|-----------------------|
| Bait ID:         | 6          | Clone Number:  | N/A                   |
| Gene ID:         | 56257      | Genus Species: | Homo sapiens (human)  |
| Locus Tag:       |            | Created:       | 2010-01-05            |
| Gene Name:       | MEPCE      | Created by:    | Prohits Administrator |
| Family:          |            | Project:       | Demo Human Gel Free   |
| Bait MW:         | 24.950 kDa | Status         |                       |

|< < > >|

**New Experiment --Gel Free**

**Experiment Name:** MEPCE  
**Biological Material:** Tet Inducible Flp-In 293 | January | 1 | 2010  
[\[view\]](#)  
**Affinity Purification:** Human cell lysis and FLAG IP : GC protocol | January | 2 | 2010  
[\[view\]](#)  
**Peptide Preparation:** Simple in-solution trypsin digest of AP samples | January | 3 | 2010  
[\[view\]](#)  
**LC-MS:** -----Choose one----- | January | 4 | 2010  
[\[view\]](#)

Section 1: text-based protocols

**Controlled Vocabularies of Experimental Details** [\[Edit\]](#)  
→

Section 2: controlled vocabulary

**Additional Description:**

Section 3: free text and images

**Images:**    
please only upload JPG and GIF formatted less than 5 MG image.

### User-defined free-text protocols

In section 1, drop-down menus allow for the selection of user-specified protocols for each experiment. We suggest describing generic protocols in detail (in a manner similar to the Methods section of an article). The protocols can be entered and managed using the "Manage Protocols and Lists" option (more on this later).

### Controlled vocabulary

Section 2 offers (via the Experimental Detail Editor) the possibility to specify controlled vocabulary to describe the experiment. The controlled vocabulary is specified for each project by using the "Experimental Editor" option within "Manage Protocols and Lists". Note that this vocabulary can facilitate compliance to community guidelines, such as HUPO Proteomics Standard Initiative (e.g. PSI-MI 2.5). This controlled vocabulary (drop-down keywords) can be used for searching and structuring the data using the "Advanced Search" option.

### Additional annotation

Section 3 allows for additional free-text annotation in the form of notes. Here you can cross-reference to notebook page numbers, add specifics of the experiment not captured in sections 1 and 2, or describe any problem or deviation from the reference protocols. It also allows you to link image files (e.g. Western blots or silver stained gels).

### fi Navigate through the dropdown menus to select appropriate protocols associated with the experiment.

Note that selecting the option "Edit" within Section 2: Controlled Vocabularies of Experimental Details will open up a new window with dropdown menus.

*Controlled Vocabularies* (Experimental Details)

Click "+" to add new selection or option

Interaction detection method: MI:0007 anti tag coimmunoprecipitation [+]

Cell type: 293 Flp-In T-REx Invitrogen [+]

Tissue source: [+]

Selected Options

Interaction detection method: MI:0007 anti tag coimmunoprecipitation [Up] [Down] [X]

Cell type: 293 Flp-In T-REx Invitrogen [Up] [Down] [X]

Buttons: Pass Data, Close

### fi Select all desired fields to capture using the dropdown menus.

The selected options will be displayed on the right hand side in the order that they were selected. Use the Up/Down green arrows to change the order, or click on the **x** to remove the entry.

### fi Select [Pass Data] to transfer selection to the Experimental Detail page or [Close] to exit without saving the data.

### fi Continue filling experimental details, link any desired image, and press [Save].

Bait
Experiment
Sample

Delete
 Next Level
 Modify
 Next

**Experiments** (Project: Demo Human Gel Free)
 [\(Submit Gel Free Sample\)](#)
[\[New Experiment\]](#)
[\[Experiment List\]](#)
[\[Back to Bait\]](#)

| Bait Information |            |                |                                                                                                                                                   |
|------------------|------------|----------------|---------------------------------------------------------------------------------------------------------------------------------------------------|
| Bait ID:         | 6          | Clone Number:  | N/A                                                                                                                                               |
| Gene ID:         | 56257      | Genus Species: | Homo sapiens (human)                                                                                                                              |
| Locus Tag:       |            | Created:       | 2010-01-05                                                                                                                                        |
| Gene Name:       | MEPCE      | Created by:    | Prohits Administrator                                                                                                                             |
| Family:          |            | Project:       | Demo Human Gel Free                                                                                                                               |
| Bait MW:         | 24.950 kDa | Status:        | <span style="color: orange;">■</span> <span style="color: green;">■</span> <span style="color: blue;">■</span> <span style="color: red;">■</span> |

Update completed (no new image uploaded).

| Experimental Details                                                   |                                                                                                                                                                                                                                            |
|------------------------------------------------------------------------|--------------------------------------------------------------------------------------------------------------------------------------------------------------------------------------------------------------------------------------------|
| Experiment Name:                                                       | MEPCE                                                                                                                                                                                                                                      |
| Biological Material:                                                   | Tet Inducible Flp-In 293 2010-1-1 <a href="#">[change]</a> <a href="#">[view]</a>                                                                                                                                                          |
| Affinity Purification:                                                 | Human cell lysis and FLAG IP : GC protocol 2010-1-2 <a href="#">[change]</a> <a href="#">[view]</a>                                                                                                                                        |
| Peptide Preparation:                                                   | Simple in-solution trypsin digest of AP samples 2010-1-3 <a href="#">[change]</a> <a href="#">[view]</a>                                                                                                                                   |
| LC-MS:                                                                 | Pressure bomb-load LC-MS on LTQ : BL protocol 2010-1-4 <a href="#">[change]</a> <a href="#">[view]</a>                                                                                                                                     |
| Controlled Vocabularies of Experimental Details <a href="#">[Edit]</a> |                                                                                                                                                                                                                                            |
| Interaction detection method :                                         | MI:0007 anti tag coimmunoprecipitation                                                                                                                                                                                                     |
| Cell type :                                                            | 293 Flp-In T-REx Invitrogen                                                                                                                                                                                                                |
| Additional Description:                                                | List here additional notes, e.g.:<br>1) changes to standard protocol above<br>2) other experimental details not captured above<br>3) cross-references to internal databases<br>4) cross-references to notebooks<br>5) data ownership notes |
| Images:<br>(western blot images)                                       | <input type="text"/> <input type="button" value="Browse..."/> <input type="button" value="attach image"/><br>please only upload JPG and GIF formatted less than 5 MG image.                                                                |
| Created by:                                                            | Prohits Administrator                                                                                                                                                                                                                      |
| <input type="button" value="Modify"/>                                  |                                                                                                                                                                                                                                            |

Upon saving, you will be given the option to "Modify" the entry or follow the green arrow to the next page to enter specific samples. Additionally, you can continue creating experiments by toggling between the [New Experiment], [Experiment List] and [Back to Bait] buttons at the top of the page to enter biological replicates for each of the baits.

### fi Return periodically to the [Back to Bait] list to monitor your progress.

Note the colour-coded experimental status bars in the table. This view shows our five baits, with experiments defined for four of them (MEPCE, EIF4A2, WASL and RAF1). The status column displays experimental details, experimental status and bait groups (see below). The colour-coding in the "Status" column indicates that information has been entered for each of the specified fields.

### fi Click on the colour-coded status bar to obtain additional experimental details

In the Bait view, experiments (and samples) defined under the same bait will be combined in the same row; multiple experiments will be shown by stacked colour bars. Note that you cannot delete baits for which experiments have been defined (note in the picture below that the FLAG\_alone bait can still be deleted, since no experimental details have been entered yet). Start by deleting the Experimental Details, and work your way up as previously described.

**Baits** (Project: Demo Human Gel Free) (Submit Gel Free Sample) [Add New Bait] [Bait List]

Column Display Set [A]

Experiment status color keys [+] Bait groups [+]

select to compare Total Baits : 5 (1 Page) 1

| ID                          | GeneName   | Tag    | ProteinID | User                  | Status                                                                                                                                                                                                                                                                                                                                                                                                                                                                                                                                                                                                                                             | Options |
|-----------------------------|------------|--------|-----------|-----------------------|----------------------------------------------------------------------------------------------------------------------------------------------------------------------------------------------------------------------------------------------------------------------------------------------------------------------------------------------------------------------------------------------------------------------------------------------------------------------------------------------------------------------------------------------------------------------------------------------------------------------------------------------------|---------|
| <input type="checkbox"/> 10 | FLAG_alone | N-Flag |           | Prohits Administrator |                                                                                                                                                                                                                                                                                                                                                                                                                                                                                                                                                                                                                                                    | [Icons] |
| <input type="checkbox"/> 9  | RAF1       | N-Flag | 4506401   | Prohits Administrator | <p>RAF1_pallotA<br/>(Interaction detection method: MI:0007 anti tag coimmunoprecipitation<br/>Cell type: 293 Flp-In T-REx Invitrogen)</p> <p>let Inducible Flp-In 293 (2010-1-1)</p> <p>Human cell lysis and FLAG IP : GC protocol (2010-1-2)</p> <p>Simple in solution trypsin digest of AP samples (2010-1-3)</p> <p>Pressure bomb-load LC-MS on LTQ : BL protocol (2010-1-4)</p> <p><b>Expt. Notes:</b><br/>List here additional notes, e.g.: 1) changes to standard protocol above; 2) other experimental details not captured above; 3) cross-references to internal databases; 4) cross-references to notebooks; 5) data ownership notes</p> | [Icons] |
| <input type="checkbox"/> 8  | WASL       | N-Flag | 51702526  | Prohits Administrator |                                                                                                                                                                                                                                                                                                                                                                                                                                                                                                                                                                                                                                                    | [Icons] |
| <input type="checkbox"/> 7  | EIF4A2     | N-Flag | 83700235  | Prohits Administrator |                                                                                                                                                                                                                                                                                                                                                                                                                                                                                                                                                                                                                                                    | [Icons] |
| <input type="checkbox"/> 6  | MEPCE      | N-Flag | 47271406  | Prohits Administrator |                                                                                                                                                                                                                                                                                                                                                                                                                                                                                                                                                                                                                                                    | [Icons] |

Total Baits : 5 (1 Page) 1

Once your baits and experiments are entered, you can create one or multiple samples to be linked to the bait and experiment. The number of samples you create for a given experiment depends on your experimental set-up. We tend to use different samples from a single experiment to represent technical replicates (i.e. different MS runs from the same biological sample), where all conditions are the same. Alternatively, multiple samples from one experiment may be created when the sample has been fractionated (e.g. by strong cation exchange) prior to the analysis. Each of the fractions is then assigned a different sample name within the same experiment. The "Notes" sections from the Experimental Details page should explain the sample-naming scheme. Note that we enter biological replicates as different experiments from the same bait.

## Creating a new sample

Following the green arrow on any of the Experimental Details pages will open a new window, allowing you to create one or many samples for a given experiment.

**fi In the Sample page, select the [Add New Sample] button to create a sample entry for this bait and set of experimental conditions.**

Band (Sample) (Project: Demo Human Gel Free) (Submit Gel Free Sample) [Back to Experiment]

| Bait ID (6)        | Experiment (4)                   |
|--------------------|----------------------------------|
| Gene ID:           | 56257                            |
| LocusTag/GeneName: | / MEPCE                          |
| Bait MW:           | 24.950 kDa                       |
| Clone Number:      | N/A                              |
| Exp. Name:         | MEPCE_pelletA                    |
| Created by:        | Prohits Administrator 2010-01-05 |

| Gel ( )             |  |
|---------------------|--|
| Gel Name:           |  |
| Gel Image:          |  |
| Method of Staining: |  |
| Gel Type:           |  |
| Uploaded:           |  |
| Uploaded by:        |  |

Add New Sample

| # | Band(Sample) ID | Band(Sample) Code / Name | Options |
|---|-----------------|--------------------------|---------|
|   |                 |                          |         |

By default, ProHits will use the experiment name to name the first sample created from the relevant experiment. ProHits will also assign a unique Sample ID. The sample name can be modified if necessary (in this case, just type the desired sample name in the text box). In our group, we reserve the creation of duplicate samples from the same bait/experiment for technical replicates (e.g. if we split the final sample in half, and run each half separately). Note that creating multiple samples from a single bait/experiment results in an automatic appending of \_A, \_B, etc. at the end of the sample name. As long as a sample is not linked to any RAW file, it can be deleted by the owner.

Band (Sample) (Project: Demo Human Gel Free) (Submit Gel Free Sample) [Back to Experiment]

| Bait ID (6)        | Experiment (4)                   |
|--------------------|----------------------------------|
| Gene ID:           | 56257                            |
| LocusTag/GeneName: | / MEPCE                          |
| Bait MW:           | 24.950 kDa                       |
| Clone Number:      | N/A                              |
| Exp. Name:         | MEPCE_pelletA                    |
| Created by:        | Prohits Administrator 2010-01-05 |

| Gel ( )             |  |
|---------------------|--|
| Gel Name:           |  |
| Gel Image:          |  |
| Method of Staining: |  |
| Gel Type:           |  |
| Uploaded:           |  |
| Uploaded by:        |  |

Add New Sample

| # | Band(Sample) ID | Band(Sample) Code / Name | Options |
|---|-----------------|--------------------------|---------|
| 1 | 8               | MEPCE_pelletA            |         |

Now that you have created a new sample entry, you are ready to link it to a mass spectrometry raw data file from the Data Management module. Links can be created automatically if the nomenclature indicated in the notice below for file naming is respected, and ProHits Data Management module is connected to the acquisition computers. Alternatively, links can be created manually either from the Data Management or the Analyst modules.

### Notice:

In order to link a raw file to a gel free sample automatically, name the folder and raw file as follows.

- raw file(s) is in a folder, the folder name ends with the Project ID.
- start with sample ID and first 4 characters of sample code.

AnyNameNoSpace\_P3 ( project ID is 3)  
 8\_MEPC\_AnyOtherWordNoSpace.RAW

## Linking raw files to a created sample

### Linking raw files from the Data Management module

fi From any page in the Analyst module, click “Data Management” on the left menu bar (shown by orange arrow on the right), link the desired file (as described in the Data Management section), parse the hits and return to the Analyst module.

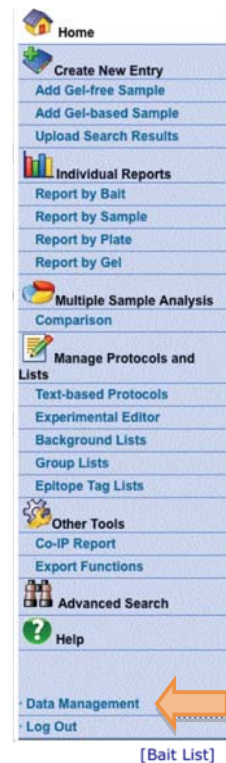

### Linking raw files directly from the Analyst module (alternative)

For this alternative example, we are linking files from the Demo Yeast Gel free project, which you can access by going back to the home page of the Analyst module.

fi Go to the “Report by Bait” or “Report by Sample” page of the Analyst module and click on the Status column of the desired file to display experimental details. Select [Link raw file].

### Baits (Project: Demo Yeast Gel Free)

Column Display Set

Experiment status color keys [+]

Bait groups [+]

select to compare

Total Baits : 9 (1 Page) 1

| ID                          | GeneName | Tag  | ProteinID | User                  | Status                                                                                                                                                                                                                                                                                                                                                                                                                                                                                                                                                                                                                                                                                                                                                                                                                                                                                                                                                                                                                                                                                                                                                                                                                                                                                                                                                                                                                                                                                                      | Options                                                                                                                                                                                                                                                           |
|-----------------------------|----------|------|-----------|-----------------------|-------------------------------------------------------------------------------------------------------------------------------------------------------------------------------------------------------------------------------------------------------------------------------------------------------------------------------------------------------------------------------------------------------------------------------------------------------------------------------------------------------------------------------------------------------------------------------------------------------------------------------------------------------------------------------------------------------------------------------------------------------------------------------------------------------------------------------------------------------------------------------------------------------------------------------------------------------------------------------------------------------------------------------------------------------------------------------------------------------------------------------------------------------------------------------------------------------------------------------------------------------------------------------------------------------------------------------------------------------------------------------------------------------------------------------------------------------------------------------------------------------------|-------------------------------------------------------------------------------------------------------------------------------------------------------------------------------------------------------------------------------------------------------------------|
| <input type="checkbox"/> 19 | ALK2     | C-HA | 6319462   | Prohits Administrator |  <p>ALK2_sampleA(Interaction detection method: MI:0007 anti tag coimmunoprecipitation)</p> <ul style="list-style-type: none"> <li>Growth and gal induction for HTP yeast project (2010-1-1)</li> <li>ProteinA-magnetic bead IP for HTP yeast project (2010-1-2)</li> <li>Trypsin digestion on magnetic beads (2010-1-3)</li> <li>Autosampler-LTQ analysis for HTP yeast project (2010-1-4)</li> <li><a href="#">[link raw file]</a></li> </ul> <p><b>Expt.Notes:</b><br/>List here additional notes, e.g.: 1) changes to standard protocol above; 2) other experimental details not captured above; 3) cross-references to internal databases; 4) cross-references to notebooks; 5) data ownership notes</p> <p>ALK2_sampleB(Interaction detection method: MI:0007 anti tag coimmunoprecipitation)</p> <ul style="list-style-type: none"> <li>Growth and gal induction for HTP yeast project (2010-1-2)</li> <li>ProteinA-magnetic bead IP for HTP yeast project (2010-1-3)</li> <li>Trypsin digestion on magnetic beads (2010-1-4)</li> <li>Autosampler-LTQ analysis for HTP yeast project (2010-1-5)</li> <li><a href="#">[link raw file]</a></li> </ul> <p><b>Expt.Notes:</b><br/>List here additional notes, e.g.: 1) changes to standard protocol above; 2) other experimental details not captured above; 3) cross-references to internal databases; 4) cross-references to notebooks; 5) data ownership notes</p> |    |

This brings up a new page that allows you to select the file to be linked to the given entry.

Note that when you link files from the Analyst module, only those files not previously linked to another entry will be displayed. To modify an existing link, you need to go back to the Data Management module, remove the link to the initial file, so that it can be made available to link to an entry either through the Analyst or Data Management modules.

**Link Prohits sample to raw file**

**Sample information**

Project Name: (2) Demo Yeast Gel Free  
 Bait: (19) ALK2  
 Experiment: (29) ALK2\_sampleA  
 Gel: Gel free  
 Sample: (32) ALK2\_sampleA

**Sample information**

Project: (2) Demo Yeast Gel Free  
 Machine Name: LQT\_DEMO

[Get raw file info.](#)

Select LQT\_DEMO Raw file (Project: Demo Yeast Gel Free)  
 Total Folder : 1 (1 Page) 1

LQT\_DEMO

- (3) YST\_GelFree\_P2
  - 3461\_TPK2\_HA.RAW 76,331(KB) 2010-01-08
  - 3459\_SWE1\_RAW 81,859(KB) 2010-01-08
  - 3495\_SWE1\_RAW 84,361(KB) 2010-01-08
  - 3493\_SWE1\_RAW 83,629(KB) 2010-01-08
  - 3427\_TPK2\_RAW 87,802(KB) 2010-01-08
  - 3423\_TPK2\_RAW 84,850(KB) 2010-01-08
  - 3367\_Swe1\_b\_RAW 84,353(KB) 2010-01-08
  - 3366\_Swe1\_b\_RAW 86,873(KB) 2010-01-08
  - 3354\_MPS1\_b\_RAW 85,196(KB) 2010-01-08
  - 3353\_MPS1\_b\_RAW 72,876(KB) 2010-01-08
  - 3325\_Swe1\_HA\_b\_RAW 82,100(KB) 2010-01-08
  - 3324\_Swe1\_HA\_b\_RAW 87,740(KB) 2010-01-08
  - 3312\_MPS1\_HA\_b\_RAW 87,666(KB) 2010-01-08
  - 3311\_MPS1\_HA\_b\_RAW 87,148(KB) 2010-01-08
  - 3142\_ALK2\_RAW 80,871(KB) 2010-01-08
  - 3141\_ALK2\_RAW 89,317(KB) 2010-01-08
  - 2810\_ALK2\_HA\_RAW 86,558(KB) 2010-01-08
  - 2809\_ALK2\_HA\_RAW 83,066(KB) 2010-01-08

Sort Folder Clear All Cancel Submit

Once a raw file has been linked, the status bar will display an additional blue icon; the number indicates the number of files linked to that entry.

## Baits (Project: Demo Yeast Gel Free)

Column Display Set

[\[Bait List\]](#)

Experiment status color keys [\[+\]](#)

Bait groups [\[+\]](#)

[select to compare](#)

Total Baits : 9 (1 Page) 1

| ID | GeneName | Tag  | ProteinID | User                  | Status                                                                                                                                                                                                                                                                                                                                                                                                                                                                                                                                                                                                                                                                                                                                                                                                                                                                                                                                                                                                                                                                                                                                                                                                                                                                                                                                                                                                                                                               | Options |
|----|----------|------|-----------|-----------------------|----------------------------------------------------------------------------------------------------------------------------------------------------------------------------------------------------------------------------------------------------------------------------------------------------------------------------------------------------------------------------------------------------------------------------------------------------------------------------------------------------------------------------------------------------------------------------------------------------------------------------------------------------------------------------------------------------------------------------------------------------------------------------------------------------------------------------------------------------------------------------------------------------------------------------------------------------------------------------------------------------------------------------------------------------------------------------------------------------------------------------------------------------------------------------------------------------------------------------------------------------------------------------------------------------------------------------------------------------------------------------------------------------------------------------------------------------------------------|---------|
| 19 | ALK2     | C-HA | 6319462   | Prohits Administrator | <p>ALK2_sampleA(interaction detection method: MI:0007 anti tag coimmunoprecipitation)</p> <ul style="list-style-type: none"> <li>Growth and gal induction for HTP yeast project (2010-1-1)</li> <li>ProteinA-magnetic bead IP for HTP yeast project (2010-1-2)</li> <li>Trypsin digestion on magnetic beads (2010-1-3)</li> <li>Autosampler-LTQ analysis for HTP yeast project (2010-1-4)</li> <li>2809_ALK2_HA.RAW (83,066KB) <a href="#">[detail]</a></li> </ul> <p><b>Expt. Notes:</b><br/>           List here additional notes, e.g.: 1) changes to standard protocol above; 2) other experimental details not captured above; 3) cross-references to internal databases; 4) cross-references to notebooks; 5) data ownership notes</p> <p>ALK2_sampleB(interaction detection method: MI:0007 anti tag coimmunoprecipitation)</p> <ul style="list-style-type: none"> <li>Growth and gal induction for HTP yeast project (2010-1-2)</li> <li>ProteinA-magnetic bead IP for HTP yeast project (2010-1-3)</li> <li>Trypsin digestion on magnetic beads (2010-1-4)</li> <li>Autosampler-LTQ analysis for HTP yeast project (2010-1-5)</li> <li><a href="#">[link raw file]</a></li> </ul> <p><b>Expt. Notes:</b><br/>           List here additional notes, e.g.: 1) changes to standard protocol above; 2) other experimental details not captured above; 3) cross-references to internal databases; 4) cross-references to notebooks; 5) data ownership notes</p> |         |

fi Click the “Data Management” tab from any page of the Analyst module, parse the hits (as described in the Data Management section) and return to the Analyst module.

Once hits are parsed (either from the Data Management or the Analyst module), a new purple coloured tab will appear in the status bar (in either Bait Report or Sample Report pages), indicating the total number of hits identified (sum of hits if more than one search engine was used). In the "Options" column, a new graph icon appears; clicking this link brings up the search results for each sample. Here we are showing MEPCE\_pellet A in the sample report view.

## Samples (Project: Demo Human Gel Free)

Column Display Set  

Experiment status color keys [\[+\]](#)

Sample groups [\[+\]](#)

 select to compare

Total Bands : 10 (1 Page) 1

| Sample ID                  | Sample Name   | BaitID | BaitGene | User                  | Date       | Exp. Status                                                                                                                                                                                                                                                                                                                                                                                                                                                                                                                                                                                                                                                                                                                                                                                                                                                                                                                   | Options                                                                                                                                                                                                                                                     |
|----------------------------|---------------|--------|----------|-----------------------|------------|-------------------------------------------------------------------------------------------------------------------------------------------------------------------------------------------------------------------------------------------------------------------------------------------------------------------------------------------------------------------------------------------------------------------------------------------------------------------------------------------------------------------------------------------------------------------------------------------------------------------------------------------------------------------------------------------------------------------------------------------------------------------------------------------------------------------------------------------------------------------------------------------------------------------------------|-------------------------------------------------------------------------------------------------------------------------------------------------------------------------------------------------------------------------------------------------------------|
| <input type="checkbox"/> 8 | MEPCE_pelletA | 6      | MEPCE    | Prohits Administrator | 2010-01-05 | Show groups: <input type="checkbox"/> Bait <input type="checkbox"/> Experiment <input checked="" type="checkbox"/> Sample <input type="checkbox"/> Version<br> 11369<br>MEPCE_pelletA<br>(Interaction detection method: Mt:0007 anti tag coimmunoprecipitation<br>Cell type: 293 Flp-In T-REx Invitrogen)<br>Tet Inducible Flp-In 293 clone (2010-1-1)<br>293 cell lysis and FLAG IP (2010-1-7)<br>In-solution digest of IP samples (2010-1-7)<br>Pressure-bomb load on LTQ (2010-1-7)<br>8_MEPCE_pelletA.RAW (167,540KB) <a href="#">[detail]</a><br># of Hits: 590 TPP hits: 779<br><b>Expt. Notes:</b><br>List here additional notes, e.g.: 1) changes to standard protocol above; 2) other experimental details not captured above; 3) cross-references to internal databases; 4) cross-references to notebooks; 5) data ownership notes |    |

You are now ready to explore your results. Use the left-hand side of the ProHits Analyst main page to view "Report by Bait" and "Report by Sample". The interface for the Bait and Sample reports is very similar. Here we provide an example for the Sample Report. *Bait versus Sample view: For some projects you may have a one-to-one correspondence between bait and sample. For other projects, you will have multiple samples linked to the same bait. Opening the Bait Report when two or more samples are linked to the bait will generate sequential protein hit lists for each of the samples linked to the bait. ProHits does not recalculate scores or peptide numbers, but indicates (in bold) proteins detected in more than one sample (mousing over bolded names activates a pop-up window that provides details about the samples and hit scores). If you wish to explore each sample individually, use the "Report by Sample" link instead.*

## Navigating through the results

Now that we have entered baits, linked and parsed search results, it is time to look at search results. In this example, we will start from the "Report by Sample" page for MEPCE\_pelletA.

**fi From the sample list page, under "Options", select the graph icon from one of the samples to see the results.**

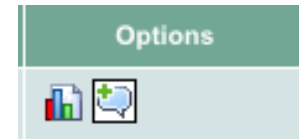

The following page appears, displaying the results from your search engine (Mascot in this example), alongside links to initial search results and biological databases. Additional export and viewing functions, as well as options to filter the hits are also available from this page. Over the next several pages, we will explore the Results page.

Exclusion Color Gel image Mascot GPM Hit Notes Yes No Possible In Progress

**Sample Report Hits**  
(Project: Demo Human Gel Free)

[Cytoscape] [Export Sample Report] [Back to Sample List]

**Bait Information (6)** [GI][Gene][BioGrid]

|                |       |                  |                                   |
|----------------|-------|------------------|-----------------------------------|
| Bait Gene ID   | 56257 | Bait Gene Name   | MEPCE (N-Flag)                    |
| Bait Locus Tag |       | Bait MW (kDa)    | 24.950                            |
| Bait Clone     | N/A   | Bait Description | AF264752_1 unknown [Homo sapiens] |

**Experiment Information**

| Experiment ID | Name/Batch Name | Exp. Detail                                                                                                    | Exp. Status: | Inputed by            | Date       |
|---------------|-----------------|----------------------------------------------------------------------------------------------------------------|--------------|-----------------------|------------|
| 4             | MEPCE_pelletA   | Interaction detection method : MI:0007 anti tag coimmunoprecipitation; Cell type : 293 Flp-In T-REx Invitrogen | 11369        | Prohits Administrator | 2010-01-05 |

**Sample Information**

|           |               |                       |
|-----------|---------------|-----------------------|
| Sample ID | Sample Code   | Submitted by          |
| 8         | MEPCE_pelletA | Prohits Administrator |

[Show Filters]

Click to enable filtering options

Use tabs to navigate through results pages

Search results

Export and visualization

Total Hits: 343

Update Frequency

| Mascot Hits | GPM Hits | Mascot TPP Hits | Mascot TPP Peptides | Other TPP Hits | Other TPP Peptides |           |         |                                                                                 |           |                  |          |                     |        |        |
|-------------|----------|-----------------|---------------------|----------------|--------------------|-----------|---------|---------------------------------------------------------------------------------|-----------|------------------|----------|---------------------|--------|--------|
| ID          | Protein  | Gene            | Score               | Expect         | Frequency          | Redundant | MW kDa  | Description                                                                     | # Peptide | # Unique Peptide | Coverage | Links               | Filter | Option |
| 47271400    |          | 56257 / MEPCE   | 1100                | 20%            |                    |           | 74.310  | bin3; bicoid-interacting 3 [Homo sapiens]                                       | 152       | 19               | 43.00%   | [GI][Gene][BioGrid] |        |        |
| 425         | 4502491  | 708 / C10BP     | 686                 | 100%           |                    |           | 31.340  | complement component 1; q subcomponent binding protein precursor [Homo sapiens] | 138       | 9                | 60.60%   | [GI][Gene][BioGrid] |        |        |
| 413         | 7661952  | 9733 / SART3    | 1463                | 20%            |                    |           | 109.860 | squamous cell carcinoma antigen recognized by T cells 3 [Homo sapiens]          | 105       | 20               | 26.90%   | [GI][Gene][BioGrid] |        |        |
| 416         | 55956788 | 4691 / NCL      | 1011                | 100%           |                    |           | 76.570  | nucleolin [Homo sapiens]                                                        | 84        | 16               | 25.80%   | [GI][Gene][BioGrid] |        |        |
| 430         | 10835063 | 4869 / NPM1     | 657                 | 100%           | 40353734           |           | 32.550  | nucleophosmin 1 isoform 1 [Homo sapiens]                                        | 65        | 7                | 36.70%   | [GI][Gene][BioGrid] |        |        |

### Search results

Towards the bottom of the page are the search results – by default, these are not filtered. The red colour in the ID field indicates the bait (as defined by the user when entering the experimental description). There are several tabs at the top of the search results table available for navigation. The exact tabs displayed depend on the search engines used. For the demonstration project, we have used the search engines Mascot and X!Tandem (GPM), and have analysed the results using the TransProteomics Pipeline. We will first explore the "Mascot Hits" tab.

### The columns list the following parameters:

- ID: Unique identifier assigned by ProHits (for database purposes)
- Protein: Protein accession number from original database used by the search engine
- Gene: NCBI Gene ID/ Gene Symbol, mapped by ProHits from Protein accession
- Score: Mascot score (if applicable)
- Expect value: GPM / X!Tandem Expect value (if applicable)
- Frequency: The frequency that this protein hit is detected across all samples analyzed for this project
- Redundant: Other protein accession numbers matching the same set of peptides
- MW kDa: Calculated MW for the protein
- Description: Definition field from the NCBI protein entry
- # Peptide: Spectral counts (or total peptides), as calculated by the search engine
- # Unique Peptide: Number of unique peptides, as calculated by the search engine



- L) Coverage: Percentage of the indicated amino acid sequence identified by your search engine
- M) Links: External links to the NCBI Entrez Protein page [GI], the NCBI Gene Page [Gene] and the BioGrid [BioGrid].
- N) Filter: provides a colour-coded view of the Experimental Filters or Bio Filters that could be applied to remove each hit
- O) Option: Provides the list of peptides belonging to this hit (green M icon), opens up the original search engine search results (here Matrix Science icon for Mascot search results), and allows for the addition of Notes (call-out icons; includes manual exclusion)

**Sorting options**

You can sort the results from any of the black underlined columns (Score, #Peptide, #UniquePeptide and Coverage); sorting can be in ascending or descending value.

**Links details**

The following pages can be obtained from each of the items in the "Links" column.

GI

Gene

BioGrid

**Option details**

Pressing the following icons in the Option column will retrieve the peptide list (from the search engine) for each hit, or the entire search results file.

| Hit Information (7661952) |                                                            |              |                                     | Mascot Search Results |                                             |          |
|---------------------------|------------------------------------------------------------|--------------|-------------------------------------|-----------------------|---------------------------------------------|----------|
| Instrument                | ESI-TRAP                                                   | Score/Expect | 146/V                               |                       |                                             |          |
| Redundant                 |                                                            | Results File | Click to view Mascot search results |                       |                                             |          |
| Search Database           | Human_RefseqV33 Human_RefseqV33_20090226.fasta-all entries | Search Date  | 2010-01-09 00:33:49                 |                       |                                             |          |
| ID                        | Score                                                      | Expect       | Charge                              | Mass (kDa)            | Location                                    | Sequence |
| 1914                      | 35                                                         | 2            | 1.619750                            | 310-322               | LAEQYQYDFEMK                                |          |
| 1904                      | 35                                                         | 2            | 1.620740                            | 310-322               | LAEQYQYDFEMK + 1 Deamidated (NQ)G5          |          |
| 1971                      | 35                                                         | 3            | 2.064540                            | 310-360               | ALQYPSAALPQALNPAAANVAKPLATAPK               |          |
| 1907                      | 35                                                         | 2            | 1.619750                            | 310-322               | LAEQYQYDFEMK                                |          |
| 1903                      | 36                                                         | 2            | 1.595790                            | 302-405               | HGVDRHSVYTFEK + 1 Deamidated (NQ)G6         |          |
| 1876                      | 36                                                         | 2            | 1.077560                            | 224-232               | GLALWEAYR                                   |          |
| 1915                      | 37                                                         | 2            | 1.619750                            | 310-322               | LAEQYQYDFEMK                                |          |
| 1938                      | 37                                                         | 2            | 1.619750                            | 310-322               | LAEQYQYDFEMK                                |          |
| 1916                      | 37                                                         | 2            | 1.619750                            | 310-322               | LAEQYQYDFEMK                                |          |
| 1873                      | 38                                                         | 2            | 0.917530                            | 328-335               | IGLIFER                                     |          |
| 1933                      | 38                                                         | 2            | 1.619750                            | 310-322               | LAEQYQYDFEMK                                |          |
| 1895                      | 38                                                         | 3            | 1.594810                            | 302-405               | HGVDRHSVYTFEK                               |          |
| 1903                      | 38                                                         | 2            | 2.277060                            | 702-721               | DSYIVYNSLPTSMQKPDPTK + 1 Deamidated (NQ)D15 |          |
| 1936                      | 38                                                         | 2            | 1.619750                            | 310-322               | LAEQYQYDFEMK                                |          |
| 1911                      | 38                                                         | 2            | 1.619750                            | 310-322               | LAEQYQYDFEMK                                |          |
| 1875                      | 38                                                         | 2            | 1.077560                            | 224-232               | GLALWEAYR                                   |          |
| 1901                      | 39                                                         | 3            | 1.594810                            | 302-405               | HGVDRHSVYTFEK                               |          |
| 1908                      | 39                                                         | 3            | 1.594810                            | 302-405               | HGVDRHSVYTFEK                               |          |
| 1846                      | 39                                                         | 3            | 1.770900                            | 290-309               | YVPEEALIQGLAPK                              |          |
| 1934                      | 39                                                         | 3            | 1.620740                            | 310-322               | LAEQYQYDFEMK + 1 Deamidated (NQ)G5          |          |
| 1906                      | 39                                                         | 3            | 2.364200                            | 646-669               | RVNSIPAAGETGNVAVGAPK                        |          |
| 1921                      | 39                                                         | 2            | 1.619750                            | 310-322               | LAEQYQYDFEMK                                |          |

We have now navigated through the table listing the search results. However, the initial list is not filtered; that is, all hits, including likely contaminants, are listed. ProHits has a built-in filter set that can be applied to the data to help identify *bona fide* interactors.

### Using filters

Click on the [Show Filters] button within the results page to display the administrator-defined Bio and Experimental filters (see admin office for details of the filtering options) and background lists (see Manage Protocols and Lists) that can be applied to the data in this project. On the left is the filter list and the graph on the right indicates the number of proteins that would be removed by activating each of the filters. Filters are activated or de-activated by clicking their associated checkbox. Once the desired filters are selected, press "Apply exclusion" to remove associated proteins from the search results list. **Note that the default frequency filter is set in the admin office module when creating the project, and that this value is listed when you select the project from the home page (see page 3).** In the case of the "Demo Human Gel Free" project shown here, the frequency filter was set at 3%, meaning that a protein detected in >3% of samples within the project is flagged (as shown by the dark green icon in the results table). You do not need to use the default filter, and can modify this frequency cut-off as needed. Also note that the frequency is not automatically recalculated every time you add a search result to ProHits: to recalculate the frequency, use the "Update Frequency" button on any "Report" page.

[Hide Filters]

**Experiment Filters**

Score < 60     Expect > 1     Coverage < 20 %

Peptide Unique Peptide < 2     Frequency > 25 %

FLAG\_top\_contaminant     Carry Over     Spill Over     Auto-MW Exclusion

**Bio Filters**

Ribosomal     Cytoskeleton     Bait     Keratin

Artifact Protein     Translation Elongation Factor     DEAD/H Box     Albumin

**BioGrid overlap**

Physical HTP     Physical NON-HTP     Genetic HTP     Genetic NON-HTP

1) Select desired filters

2) Select "Apply Exclusion"

| Mascot Hits |           | GPM Hits      |       | Mascot TPP Hits |            | Mascot TPP Peptides |         | Other TPP Hits                                                                  |           | Other TPP Peptides |          |                   |                                     |        |
|-------------|-----------|---------------|-------|-----------------|------------|---------------------|---------|---------------------------------------------------------------------------------|-----------|--------------------|----------|-------------------|-------------------------------------|--------|
| ID          | Protein   | Gene          | Score | Expect          | Frequency  | Redundant           | MW kDa  | Description                                                                     | # Peptide | # Unique Peptide   | Coverage | Links             | Filter                              | Option |
| 425         | 47271406  | 56257 / MEPCE | 1106  | 20%             |            |                     | 74.310  | bin3; bicoid-interacting 3 [Homo sapiens]                                       | 152       | 19                 | 43.80%   | (GI Gene BioGrid) | <input checked="" type="checkbox"/> |        |
| 425         | 4502491   | 708 / C1QBP   | 686   | 100%            |            |                     | 31.340  | complement component 1; q subcomponent binding protein precursor [Homo sapiens] | 138       | 9                  | 60.60%   | (GI Gene BioGrid) | <input checked="" type="checkbox"/> |        |
| 413         | 7661952   | 9733 / SART3  | 1463  | 20%             |            |                     | 109.860 | squamous cell carcinoma antigen recognized by T cells 3 [Homo sapiens]          | 105       | 20                 | 26.90%   | (GI Gene BioGrid) | <input checked="" type="checkbox"/> |        |
| 416         | 55956788  | 4691 / NCL    | 1011  | 100%            |            |                     | 76.570  | nucleolin [Homo sapiens]                                                        | 84        | 16                 | 25.80%   | (GI Gene BioGrid) | <input checked="" type="checkbox"/> |        |
| 430         | 10835063  | 4869 / NPM1   | 657   | 100%            | 40353734;  |                     | 32.550  | nucleophosmin 1 isoform 1 [Homo sapiens]                                        | 65        | 7                  | 36.70%   | (GI Gene BioGrid) | <input checked="" type="checkbox"/> |        |
| 419         | 109809739 | 51574 / LARP7 | 955   | 20%             | 109809741; |                     | 66.860  | La ribonucleoprotein domain family, member 7 [Homo sapiens]                     | 53        | 14                 | 25.80%   | (GI Gene BioGrid) | <input checked="" type="checkbox"/> |        |

In this example, we will filter the data shown above by applying the following filters:

- 1) click the "background" button, and select the "FLAG\_top\_contaminants" list from the dropdown menu. The background lists are user-defined, and controlled via the "Manage Lists and Protocols" option.
- 2) proteins detected with a Mascot score <60 will be removed
- 3) proteins with <20% sequence coverage will be removed
- 4) proteins detected with a single unique peptide will be removed
- 5) proteins detected in >25% of the samples in this project will be removed

After applying filters, the list of hits is reduced (see the disappearance of C1QBP, NCL and NPM1 – which are common contaminants - while SART3, LARP7 and LSM8 remain). The filters can be modified and sorting repeated: ProHits does not remove any data from the dataset, but only displays filtered lists.

[Hide Filters]

**Experiment Filters**

Score < 60  Expect > 1  Coverage < 20 %

Peptide Unique Peptide < 2  Frequency > 25 %

FLAG\_top\_contaminant

Carry Over  Spill Over  Auto-MW Exclusion

**Bio Filters**

Ribosomal  Cytoskeleton  Bait  Keratin

Artifact Protein  Translation Elongation Factor  DEAD/H Box  Albumin

**BioGrid overlap** (BioGrid interactions not found here)

Physical HTP  Physical NON-HTP  Genetic HTP  Genetic NON-HTP

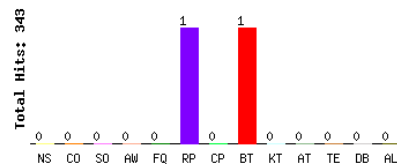

| Mascot Hits |           | GPM Hits      | Mascot TPP Hits | Mascot TPP Peptides | Other TPP Hits | Other TPP Peptides |         |                                                                        |           |                  |          |                      |        |        |
|-------------|-----------|---------------|-----------------|---------------------|----------------|--------------------|---------|------------------------------------------------------------------------|-----------|------------------|----------|----------------------|--------|--------|
| ID          | Protein   | Gene          | Score           | Expect              | Frequency      | Redundant          | MW kDa  | Description                                                            | # Peptide | # Unique Peptide | Coverage | Links                | Filter | Option |
| 415         | 47271406  | 56257 / MEPCE | 1106            | 20%                 |                |                    | 74.310  | bin3; bicoid-interacting 3 [Homo sapiens]                              | 152       | 19               | 43.80%   | [GI][Gene] [BioGrid] |        |        |
| 413         | 7661952   | 9733 / SART3  | 1463            | 20%                 |                |                    | 109.860 | squamous cell carcinoma antigen recognized by T cells 3 [Homo sapiens] | 105       | 20               | 26.90%   | [GI][Gene] [BioGrid] |        |        |
| 419         | 109809739 | 51574 / LARP7 | 955             | 20%                 | 109809741;     |                    | 66.860  | La ribonucleoprotein domain family; member 7 [Homo sapiens]            | 53        | 14               | 25.80%   | [GI][Gene] [BioGrid] |        |        |
| 468         | 7706425   | 51691 / LSM8  | 305             | 20%                 |                |                    | 10.400  | U6 snRNA-associated Sm-like protein LSM8 [Homo sapiens]                | 49        | 3                | 61.50%   | [GI][Gene] [BioGrid] |        |        |

Note that the graph on the right indicates the number of hits that have not been filtered out, but belong to the different categories that could be filtered out. In this example, after filtering, only 1 RP (Ribosomal Protein) remains, as compared to 64 in the unfiltered example.

### Comparing your data to literature interactions

Prohits allows you to automatically query the BioGrid interaction database for previously-reported interactions specific to your bait. To do so, select the type of interactions desired (physical interactions from high-throughput (HTP) studies, physical interactions not from HTP studies (non-HTP), genetic interactions of both types), and press "Apply exclusion". The interactions that overlap with the literature will be highlighted in the "filter" column. (the next few figures will be replaced by MEPCE as soon as the new version of BioGrid comes online). Note that the definition of HTP and non-HTP is from BioGrid: high-throughput papers are identified as such by BioGrid curators; as a default, publications reporting >100 interactions are also identified as HTP.

1) Select desired type(s) of data to visualize

Follow this link to see interactions reported in BioGrid but not detected here

2) Select "Apply Exclusion"

Previously reported interactions

| ID    | Protein   | Gene           | Score | Expect | Frequency | Redundant | MW kDa | Description                                         | # Peptide | # Unique Peptide | Coverage | Links                | Filter | Option                   |
|-------|-----------|----------------|-------|--------|-----------|-----------|--------|-----------------------------------------------------|-----------|------------------|----------|----------------------|--------|--------------------------|
| 86111 | 56790935  | 85369 / FAM40A | 2301  | 11.88% |           |           | 96.260 | hypothetical protein LOC85369 [Homo sapiens]        | 284       | 39               | 52.90%   | [GI][Gene] [BioGrid] |        | [M] [MATRIX] [REFERENCE] |
| 86113 | 142976686 | 29966 / STRN3  | 1588  | 14.38% |           |           | 87.550 | nuclear autoantigen isoform 1 [Homo sapiens]        | 73        | 24               | 41.80%   | [GI][Gene] [BioGrid] | ▲      | [M] [MATRIX] [REFERENCE] |
| 86112 | 51242945  | 6801 / STRN    | 1891  | 13.75% |           |           | 86.540 | striatin; calmodulin binding protein [Homo sapiens] | 65        | 29               | 49.60%   | [GI][Gene] [BioGrid] | ▲      | [M] [MATRIX] [REFERENCE] |

Selecting [BioGrid interactions not found here] opens a new window with the details of the "missed interactions", as shown below.

Note that the overlap is performed after data filtering is applied, thus care should be taken when analyzing apparent lack of overlap. The example below shows the effect of the application of a stringent filter on "missed interactions".

Missing interactions: STRINGENT FILTER

BioGrid interactions not found  Show found hits

| Gene ID                | Gene Name           | Links           | BioGrid Type |
|------------------------|---------------------|-----------------|--------------|
| Bait ID: 389           | Bait Gene ID: 85369 |                 |              |
| Bait Gene Name: FAM40A | [Gene][BioGrid]     |                 |              |
| 4163                   | MCC                 | [Gene][BioGrid] | ★            |
| 5515                   | PPP2CA              | [Gene][BioGrid] | ▲            |
| 5516                   | PPP2CB              | [Gene][BioGrid] | ▲            |
| 5518                   | PPP2R1A             | [Gene][BioGrid] | ▲            |
| 10494                  | STK25               | [Gene][BioGrid] | ▲            |
| 11235                  | PDCD10              | [Gene][BioGrid] | ▲            |
| 29888                  | STRN4               | [Gene][BioGrid] | ▲            |
| 57464                  | FAM40B              | [Gene][BioGrid] | ▲            |
| 80342                  | TRAF3IP3            | [Gene][BioGrid] | ▲            |

Missing interactions: NO FILTER

BioGrid interactions not found  Show found hits

| Gene ID                | Gene Name           | Links           | BioGrid Type |
|------------------------|---------------------|-----------------|--------------|
| Bait ID: 389           | Bait Gene ID: 85369 |                 |              |
| Bait Gene Name: FAM40A | [Gene][BioGrid]     |                 |              |
| 4163                   | MCC                 | [Gene][BioGrid] | ★            |
| 5516                   | PPP2CB              | [Gene][BioGrid] | ▲            |
| 10494                  | STK25               | [Gene][BioGrid] | ▲            |
| 80342                  | TRAF3IP3            | [Gene][BioGrid] | ▲            |

### View and navigate hits from the TransProteomics Pipeline

The tabs located immediately above the search results table allow you to explore search results that have been parsed from the PeptideProphet and ProteinProphet components of the TPP.

In the page "Mascot TPP hits", different filtering options based on the number of unique or total peptides, as well as the probability values for the TPP have been implemented. A link to the TPP search result viewer is provided in the Option column of the table (orange Institute for Systems Biology icon): this opens up the standard ProteinProphet view, allowing further exploration of the data.

[Hide Filters]

Experiment Filters

- TPP Probability < 0.9
- Coverage < 20 %
- Unique Peptide < 2
- Total Peptide < 2
- Frequency > 45 %

Bio Filters

- Ribosomal
- Cytoskeleton
- Bait
- Keratin
- Artifact Protein
- Translation Elongation Factor
- DEAD/H Box
- Albumin

BioGrid overlap

- Physical HTP
- Physical NON-HTP
- Genetic HTP
- Genetic NON-HTP

No Exclusion Apply Exclusion

Update Frequency

Viewing the "Hits From TPP" allows you to filter or sort based on TPP probability values and to open the ProteinProphet page

| Mascot Hits | GPM Hits  | Mascot TPP Hits | Mascot TPP Peptides | Other TPP Hits   | Other TPP Peptides |           |                                                                        |           |                  |          |                    |        |           |
|-------------|-----------|-----------------|---------------------|------------------|--------------------|-----------|------------------------------------------------------------------------|-----------|------------------|----------|--------------------|--------|-----------|
| ID          | Protein   | Gene            | Probability         | Pct spectrum IDs | Frequency          | Redundant | Description                                                            | # Peptide | # Unique Peptide | Coverage | Links              | Filter | Option    |
| 2629        | 47271406  | 56257 / MEPCE   | 1.0000              | 3.55             | 20%                |           | bin3; bicoid-interacting 3 [Homo sapiens]                              | 192       | 45               | 54.00%   | [GI]Gene [BioGrid] |        | [M] [ISB] |
| 2663        | 7661952   | 9733 / SART3    | 1.0000              | 2.43             | 20%                |           | squamous cell carcinoma antigen recognized by T cells 3 [Homo sapiens] | 131       | 40               | 28.70%   | [GI]Gene [BioGrid] |        | [M] [ISB] |
| 2522        | 109809739 | 51574 / LARP7   | 1.0000              | 1.88             | 40%                | 109809741 | La ribonucleoprotein domain family: member 7 [Homo sapiens]            | 86        | 25               | 31.30%   | [GI]Gene [BioGrid] |        | [M] [ISB] |
| 2000        | 7700425   | 51691 / LSM8    | 1.0000              | 1.15             | 20%                |           | UG anRNA-associated Gm-like protein LQm0 [Homo sapiens]                | 50        | 14               | 00.20%   | [GI]Gene [BioGrid] |        | [M] [ISB] |

The "Mascot TPP Peptides" tab lists all of the parsed parameters at the peptide level, and provides some basic filtering options, as well as a link to the PepXML viewer.

Experiment Information

Experiment ID: 4 Name/Batch Name: MEPCE\_pelletA Exp. Detail: Interaction detection method: M0007 anti tag coimmunoprecipitation; Cell type: 293 Pip-In T-REx Invitrogen Exp. Status: 11369 Inputted by: Prohits Administrator Date: 2010-01-11

Sample Information

Sample ID: 8 Sample Code: MEPCE\_pelletA Submitted by: Prohits Administrator

[Hide Filters]

Experiment Filters

- TPP Probability < %
- Hyper score < %
- Ion < %
- Exclude charges 1+ 2+ 3+

No Exclusion Apply Exclusion

Update Frequency

Peptides from the TransProteomics Pipeline can be filtered based on PeptideProphet scores; links to the PepXML viewer are also provided

| Mascot Hits                  | GPM Hits | Mascot TPP Hits | Mascot TPP Peptides | Other TPP Hits | Other TPP Peptides |         |        |      |            |        |          |           |            |        |
|------------------------------|----------|-----------------|---------------------|----------------|--------------------|---------|--------|------|------------|--------|----------|-----------|------------|--------|
| Select sample: MEPCE_pelletA |          |                 |                     |                |                    |         |        |      |            |        |          |           |            |        |
| ID                           | Protein  | Probability     | HyperScore          | NextScore      | B-Score            | Y-Score | Expect | Ions | Peptide    | Charge | CalcMass | DeltaMass | Miss (ctn) | Option |
| 22281                        | 4506679  | 1.0000          | 64.43               | 42.34          | 0.00               | 36.32   | 0.00   | 6/16 | IAYELLFK   | 2      | 1108.65  | 0.11      | 0          | [ISB]  |
| 22272                        | 4506679  | 1.0000          | 63.99               | 42.34          | 0.00               | 36.26   | 0.00   | 6/16 | IAYELLFK   | 2      | 1108.65  | 0.44      | 0          | [ISB]  |
| 22322                        | 4506699  | 1.0000          | 75.39               | 42.81          | 0.00               | 47.67   | 0.00   | 8/18 | MGESDLSILR | 2      | 1121.5   | -0.42     | 0          | [ISB]  |
| 22323                        | 4506699  | 1.0000          | 96.96               | 47.81          | 0.00               | 54.85   | 0.00   | 9/18 | MGFSNDSIR  | 2      | 1121.5   | -0.35     | 0          | [ISB]  |
| 22326                        | 4506699  | 1.0000          | 76.04               | 42.79          | 0.00               | 50.13   | 0.00   | 8/18 | MGESDLSILR | 2      | 1121.5   | 0.01      | 0          | [ISB]  |
| 22327                        | 4506699  | 1.0000          | 97.75               | 42.71          | 0.00               | 63.37   | 0.00   | 9/18 | MGESDLSILR | 2      | 1121.5   | 0.07      | 0          | [ISB]  |
| 22328                        | 4506699  | 1.0000          | 97.42               | 42.66          | 0.00               | 55.78   | 0.00   | 9/18 | MGESDLSILR | 2      | 1121.5   | 0.14      | 0          | [ISB]  |

### Viewing results using Cytoscape

At the top right corner on the Report page is a link to the molecular interaction visualization program Cytoscape. Clicking this link will upload the filtered data (with BioGrid interactions if this option is selected). Note that all mass spectrometry data will also be uploaded (you can use these parameters as attributes of the "edges" in Cytoscape). We will review Cytoscape requirements and basic information in the discussion of the "Comparison" function.

### Export Sample report

Selecting the "Export Sample Report" on the top right corner allows the user to export text (comma-separated values (CSV) or tab separated values (TSV)) files. Fields to be exported are user-defined and will be exported in the order selected. The user can also create pre-defined export formats that can be further modified. Note that this exports NON-FILTERED hits (filtered hits can be exported via the comparison tool).

**Export Sample Report (Project: Gingras\_Lab\_Public)**

| Sample ID | Bait ID | Sample MW | Sample Intensity |
|-----------|---------|-----------|------------------|
| 4675      | 389     | 0.000     |                  |

Export rows as: CSV Preview Generate Report

Alternatively, create a standard format for reporting

**Please select columns to be included in the export file**

**Bait:**

Bait ID

Bait Gene ID

Bait Gene Name

Bait Locus Tag

Bait Clone

Bait Description

**Experiment:**

**Sample:**

Sample ID

Sample Intensity

Instrument

Raw File Date

**Hit:**

Hit ID

Hit Locus Tag

Hit Protein ID

Redundant GI

Hit MW

Result File

Search Engine

Search Database

Filters

**Peptide:**

**Pre-defined export format**

gingras1

[\[new\]](#) [\[edit\]](#) [\[delete\]](#)

**Selected columns**

Bait ID

Bait Gene Name

Sample ID

Hit Gene Name

Hit MW

Project Frequency

Hit Mascot Score

Unique Peptide Number

Total Peptide Number

Hit Coverage

Hit Description

Select desired options; they will be listed on the right side and exported in the order selected. When done, select [Generate Report]

The exported file can be opened with Excel or similar software.

*Using the Notes option***fi Click on the "callout" icon at the end of any bait row**

This brings up the following window:

**fi Add desired text, and press [Save New Notes]**

The following screen can then be seen:

Only the person who entered the note is allowed to modify or delete it. Additional users can create additional comments on the same bait or sample.

In addition to adding free text annotation (default "Discussion" note type), "Bait groups", "Experiment groups" or "Sample Groups" can be created for each project and are managed via the "Manage Protocols and Lists" option. Use the dropdown box to select the desired "Notes Types".

| Bait Notes     |      |                  |                      |
|----------------|------|------------------|----------------------|
| Bait ID        | 1187 | Bait Gene ID     | 6418                 |
| Bait Gene Name | SET  | Bait MW (kDa)    | 32.100               |
| Bait Clone     | N/A  | Bait Description | SET nuclear oncogene |

Notes Type: Discussion

Notes: [Text input area]

Buttons: Save New Notes, Refresh, Close

| Bait Notes     |      |                  |                      |
|----------------|------|------------------|----------------------|
| Bait ID        | 1187 | Bait Gene ID     | 6418                 |
| Bait Gene Name | SET  | Bait MW (kDa)    | 32.100               |
| Bait Clone     | N/A  | Bait Description | SET nuclear oncogene |

| Notes Type | Notes                                            | Added By            | Added On            | Action  |
|------------|--------------------------------------------------|---------------------|---------------------|---------|
| Discussion | We should repeat this IP. Results are promising. | Anne-Claude Gingras | 2009-03-18 10:06:48 | [Icons] |

Notes Type: Discussion

Notes: [Text input area]

Buttons: Save New Notes, Refresh, Close

## Creating gel-based samples

ProHits has functionality designed to track samples analyzed in a high-throughput manner from gel-based proteomics. Several of the steps are identical to the steps required to create samples for gel-free projects. Here we will briefly outline the major differences when entering gel-based samples. **Note that you can add samples from in-gel digestion as "gel-free" – especially if you are only analyzing a few samples without the use of an autosampler.**

### Adding a "Gel-based" sample

**fi** Select "Add Gel-based" sample from the left menu, and choose whether you will be starting from an existing gel, or create a new gel.

#### Add Gel-based Sample (Project: Demo Yeast Gel)

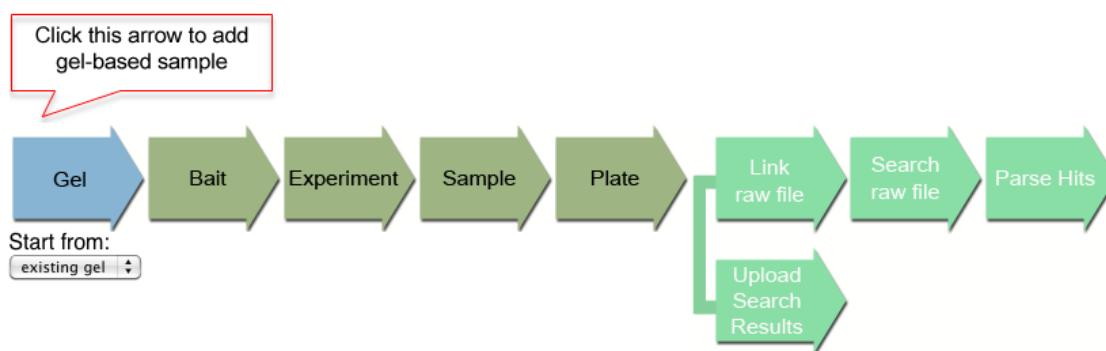

**fi** To create a new gel, add information required in bold, and upload the image of the gel.

[Gel](#) → [Bait](#) → [Experiment](#) → [Sample](#) → [Well](#)

[View Gel Image](#) [Delete](#) [Modify](#) [Next](#) [MS Not Completed](#) [MS Completed](#)

[Gels \(Project: Demo Yeast Gel\)](#) [\(Submit Gel Sample\)](#) [\[Add New\]](#) [\[Gel List\]](#)

Update completed (image was successfully uploaded).

| Modify Gel                                                       |                                                  |
|------------------------------------------------------------------|--------------------------------------------------|
| Gel ID:                                                          | 2                                                |
| <b>Gel Name:</b>                                                 | IP47-G546                                        |
| <b>Method of Staining:</b>                                       | Coomassie                                        |
| For Project:                                                     | Demo Yeast Gel                                   |
| Uploaded by:                                                     | Prohits Administrator                            |
| <b>Gel Type:</b>                                                 | 1-D Gel                                          |
| Notes:                                                           |                                                  |
| Gel Image:                                                       | P1G2_IP47-G546.jpg <a href="#">Replace Image</a> |
| <a href="#">Modify</a> <a href="#">Back</a> <a href="#">Next</a> |                                                  |

While the image is not mandatory, it is highly recommended to link a well-annotated image of the gel.

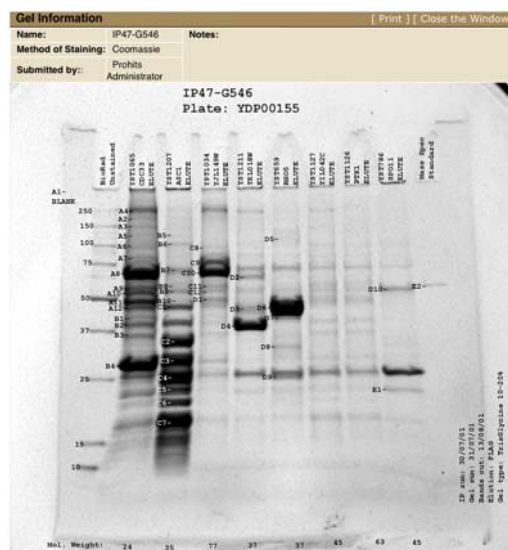



After a gel is created, you can see the information via the "Report by Gel" function on the left menu.

fi Use the green arrows in the "Options" field to enter baits from that gel (as shown in the gel-free sample section).

fi From each bait, define the Experimental Details, as shown in the gel-free section.

Clicking on the green arrow in the experimental details section will by default prompt you to define a lane on the gel, and guide you through the entry of individual band samples in the autosampler plate that you will use for data acquisition. Simply clicking on a plate well will create an associated sample – you can add the intensity of each band on the stained gel, as well as the approximate molecular weight.

Continue entering all desired bands from the selected lane, or use the navigation options at the top of the page to upload samples from the next lane, return to the list of all lanes, or return to the experimental description.

Opening the "Report by plate" and clicking the plate icon in the "Options" field, allows you to view your plate layout.

Available Well 75 Current Band < First Plate < Previous Plate > Next Plate > Last Plate Plate MS Completed Plate Plate Report

## Plates & Wells (Project: Demo Yeast Gel)

[Print Preview] [Plate List]

**Notice:** In order for Prohits to link raw files automatically, please print plate preview to get raw file name formats.

Plate ( 1 ) [Modify Plate]

| <p><b>Plate Name:</b> YDP00155<br/> <b>Created By:</b> Prohits Administrator<br/> <b>Created:</b> 2008-07-15 15:24:17<br/> <b>Digested By:</b> Prohits Administrator<br/> <b>Resusp. Buffer:</b><br/> <b>Digest Started:</b> 2008-09-19 16:05:14<br/> <b>Digest Completed:</b> 2008-09-19 16:05:14<br/> <b>MS Completed:</b> 2008-09-19<br/> <b>Plate Notes:</b></p> | <p><b>Plate Layout</b></p> <table border="1" style="width: 100%; border-collapse: collapse; text-align: center;"> <tr><th>1</th><th>2</th><th>3</th><th>4</th><th>5</th><th>6</th><th>7</th><th>8</th><th>9</th><th>10</th><th>11</th><th>12</th></tr> <tr><th>A</th><td></td><td></td><td></td><td></td><td></td><td></td><td></td><td></td><td></td><td></td><td></td></tr> <tr><th>B</th><td></td><td></td><td></td><td></td><td></td><td>35</td><td>36</td><td>37</td><td>38</td><td></td><td></td></tr> <tr><th>C</th><td></td><td>34</td><td></td><td>1</td><td></td><td></td><td></td><td></td><td></td><td></td><td></td></tr> <tr><th>D</th><td></td><td></td><td></td><td></td><td></td><td></td><td></td><td></td><td></td><td></td><td></td></tr> <tr><th>E</th><td></td><td></td><td></td><td></td><td></td><td></td><td></td><td></td><td></td><td></td><td></td></tr> <tr><th>F</th><td></td><td></td><td></td><td></td><td></td><td></td><td></td><td></td><td></td><td></td><td></td></tr> <tr><th>G</th><td></td><td></td><td></td><td></td><td></td><td></td><td></td><td></td><td></td><td></td><td></td></tr> <tr><th>H</th><td></td><td></td><td></td><td></td><td></td><td></td><td></td><td></td><td></td><td></td><td></td></tr> </table> | 1  | 2 | 3 | 4 | 5  | 6  | 7  | 8  | 9  | 10 | 11 | 12 | A |  |  |  |  |  |  |  |  |  |  |  | B |  |  |  |  |  | 35 | 36 | 37 | 38 |  |  | C |  | 34 |  | 1 |  |  |  |  |  |  |  | D |  |  |  |  |  |  |  |  |  |  |  | E |  |  |  |  |  |  |  |  |  |  |  | F |  |  |  |  |  |  |  |  |  |  |  | G |  |  |  |  |  |  |  |  |  |  |  | H |  |  |  |  |  |  |  |  |  |  |  |
|----------------------------------------------------------------------------------------------------------------------------------------------------------------------------------------------------------------------------------------------------------------------------------------------------------------------------------------------------------------------|--------------------------------------------------------------------------------------------------------------------------------------------------------------------------------------------------------------------------------------------------------------------------------------------------------------------------------------------------------------------------------------------------------------------------------------------------------------------------------------------------------------------------------------------------------------------------------------------------------------------------------------------------------------------------------------------------------------------------------------------------------------------------------------------------------------------------------------------------------------------------------------------------------------------------------------------------------------------------------------------------------------------------------------------------------------------------------------------------------------------------------------------------------------------------------------------------------------------------------------------------------------------|----|---|---|---|----|----|----|----|----|----|----|----|---|--|--|--|--|--|--|--|--|--|--|--|---|--|--|--|--|--|----|----|----|----|--|--|---|--|----|--|---|--|--|--|--|--|--|--|---|--|--|--|--|--|--|--|--|--|--|--|---|--|--|--|--|--|--|--|--|--|--|--|---|--|--|--|--|--|--|--|--|--|--|--|---|--|--|--|--|--|--|--|--|--|--|--|---|--|--|--|--|--|--|--|--|--|--|--|
| 1                                                                                                                                                                                                                                                                                                                                                                    | 2                                                                                                                                                                                                                                                                                                                                                                                                                                                                                                                                                                                                                                                                                                                                                                                                                                                                                                                                                                                                                                                                                                                                                                                                                                                                  | 3  | 4 | 5 | 6 | 7  | 8  | 9  | 10 | 11 | 12 |    |    |   |  |  |  |  |  |  |  |  |  |  |  |   |  |  |  |  |  |    |    |    |    |  |  |   |  |    |  |   |  |  |  |  |  |  |  |   |  |  |  |  |  |  |  |  |  |  |  |   |  |  |  |  |  |  |  |  |  |  |  |   |  |  |  |  |  |  |  |  |  |  |  |   |  |  |  |  |  |  |  |  |  |  |  |   |  |  |  |  |  |  |  |  |  |  |  |
| A                                                                                                                                                                                                                                                                                                                                                                    |                                                                                                                                                                                                                                                                                                                                                                                                                                                                                                                                                                                                                                                                                                                                                                                                                                                                                                                                                                                                                                                                                                                                                                                                                                                                    |    |   |   |   |    |    |    |    |    |    |    |    |   |  |  |  |  |  |  |  |  |  |  |  |   |  |  |  |  |  |    |    |    |    |  |  |   |  |    |  |   |  |  |  |  |  |  |  |   |  |  |  |  |  |  |  |  |  |  |  |   |  |  |  |  |  |  |  |  |  |  |  |   |  |  |  |  |  |  |  |  |  |  |  |   |  |  |  |  |  |  |  |  |  |  |  |   |  |  |  |  |  |  |  |  |  |  |  |
| B                                                                                                                                                                                                                                                                                                                                                                    |                                                                                                                                                                                                                                                                                                                                                                                                                                                                                                                                                                                                                                                                                                                                                                                                                                                                                                                                                                                                                                                                                                                                                                                                                                                                    |    |   |   |   | 35 | 36 | 37 | 38 |    |    |    |    |   |  |  |  |  |  |  |  |  |  |  |  |   |  |  |  |  |  |    |    |    |    |  |  |   |  |    |  |   |  |  |  |  |  |  |  |   |  |  |  |  |  |  |  |  |  |  |  |   |  |  |  |  |  |  |  |  |  |  |  |   |  |  |  |  |  |  |  |  |  |  |  |   |  |  |  |  |  |  |  |  |  |  |  |   |  |  |  |  |  |  |  |  |  |  |  |
| C                                                                                                                                                                                                                                                                                                                                                                    |                                                                                                                                                                                                                                                                                                                                                                                                                                                                                                                                                                                                                                                                                                                                                                                                                                                                                                                                                                                                                                                                                                                                                                                                                                                                    | 34 |   | 1 |   |    |    |    |    |    |    |    |    |   |  |  |  |  |  |  |  |  |  |  |  |   |  |  |  |  |  |    |    |    |    |  |  |   |  |    |  |   |  |  |  |  |  |  |  |   |  |  |  |  |  |  |  |  |  |  |  |   |  |  |  |  |  |  |  |  |  |  |  |   |  |  |  |  |  |  |  |  |  |  |  |   |  |  |  |  |  |  |  |  |  |  |  |   |  |  |  |  |  |  |  |  |  |  |  |
| D                                                                                                                                                                                                                                                                                                                                                                    |                                                                                                                                                                                                                                                                                                                                                                                                                                                                                                                                                                                                                                                                                                                                                                                                                                                                                                                                                                                                                                                                                                                                                                                                                                                                    |    |   |   |   |    |    |    |    |    |    |    |    |   |  |  |  |  |  |  |  |  |  |  |  |   |  |  |  |  |  |    |    |    |    |  |  |   |  |    |  |   |  |  |  |  |  |  |  |   |  |  |  |  |  |  |  |  |  |  |  |   |  |  |  |  |  |  |  |  |  |  |  |   |  |  |  |  |  |  |  |  |  |  |  |   |  |  |  |  |  |  |  |  |  |  |  |   |  |  |  |  |  |  |  |  |  |  |  |
| E                                                                                                                                                                                                                                                                                                                                                                    |                                                                                                                                                                                                                                                                                                                                                                                                                                                                                                                                                                                                                                                                                                                                                                                                                                                                                                                                                                                                                                                                                                                                                                                                                                                                    |    |   |   |   |    |    |    |    |    |    |    |    |   |  |  |  |  |  |  |  |  |  |  |  |   |  |  |  |  |  |    |    |    |    |  |  |   |  |    |  |   |  |  |  |  |  |  |  |   |  |  |  |  |  |  |  |  |  |  |  |   |  |  |  |  |  |  |  |  |  |  |  |   |  |  |  |  |  |  |  |  |  |  |  |   |  |  |  |  |  |  |  |  |  |  |  |   |  |  |  |  |  |  |  |  |  |  |  |
| F                                                                                                                                                                                                                                                                                                                                                                    |                                                                                                                                                                                                                                                                                                                                                                                                                                                                                                                                                                                                                                                                                                                                                                                                                                                                                                                                                                                                                                                                                                                                                                                                                                                                    |    |   |   |   |    |    |    |    |    |    |    |    |   |  |  |  |  |  |  |  |  |  |  |  |   |  |  |  |  |  |    |    |    |    |  |  |   |  |    |  |   |  |  |  |  |  |  |  |   |  |  |  |  |  |  |  |  |  |  |  |   |  |  |  |  |  |  |  |  |  |  |  |   |  |  |  |  |  |  |  |  |  |  |  |   |  |  |  |  |  |  |  |  |  |  |  |   |  |  |  |  |  |  |  |  |  |  |  |
| G                                                                                                                                                                                                                                                                                                                                                                    |                                                                                                                                                                                                                                                                                                                                                                                                                                                                                                                                                                                                                                                                                                                                                                                                                                                                                                                                                                                                                                                                                                                                                                                                                                                                    |    |   |   |   |    |    |    |    |    |    |    |    |   |  |  |  |  |  |  |  |  |  |  |  |   |  |  |  |  |  |    |    |    |    |  |  |   |  |    |  |   |  |  |  |  |  |  |  |   |  |  |  |  |  |  |  |  |  |  |  |   |  |  |  |  |  |  |  |  |  |  |  |   |  |  |  |  |  |  |  |  |  |  |  |   |  |  |  |  |  |  |  |  |  |  |  |   |  |  |  |  |  |  |  |  |  |  |  |
| H                                                                                                                                                                                                                                                                                                                                                                    |                                                                                                                                                                                                                                                                                                                                                                                                                                                                                                                                                                                                                                                                                                                                                                                                                                                                                                                                                                                                                                                                                                                                                                                                                                                                    |    |   |   |   |    |    |    |    |    |    |    |    |   |  |  |  |  |  |  |  |  |  |  |  |   |  |  |  |  |  |    |    |    |    |  |  |   |  |    |  |   |  |  |  |  |  |  |  |   |  |  |  |  |  |  |  |  |  |  |  |   |  |  |  |  |  |  |  |  |  |  |  |   |  |  |  |  |  |  |  |  |  |  |  |   |  |  |  |  |  |  |  |  |  |  |  |   |  |  |  |  |  |  |  |  |  |  |  |

If you wish to use the "Auto-link" option to link your raw files from the Data Management module to the samples in Analyst, select [Print Preview].

### Plate Information

**Plate ID:** 1  
**Plate Name:** YDP00155  
**Created By:** Prohits Administrator  
**Created On:** 2008-07-15 15:24:17  
**Project:** 1 (Demo Yeast Gel)  
**Plate Notes:**

**Raw file folder Name:**

**20080715\_YDP00155\_A1\_P1**

**Plate Layout**

| 1 | 2 | 3  | 4 | 5 | 6 | 7  | 8  | 9  | 10 | 11 | 12 |
|---|---|----|---|---|---|----|----|----|----|----|----|
| A |   |    |   |   |   |    |    |    |    |    |    |
| B |   |    |   |   |   | 35 | 36 | 37 | 38 |    |    |
| C |   | 34 |   | 1 |   |    |    |    |    |    |    |
| D |   |    |   |   |   |    |    |    |    |    |    |
| E |   |    |   |   |   |    |    |    |    |    |    |
| F |   |    |   |   |   |    |    |    |    |    |    |
| G |   |    |   |   |   |    |    |    |    |    |    |
| H |   |    |   |   |   |    |    |    |    |    |    |

### Bands In This Plate

| Raw file Name | User Name             | Well ID | Gel Image            | Band Code | Observed MW | Species | Gel Line | Modification |
|---------------|-----------------------|---------|----------------------|-----------|-------------|---------|----------|--------------|
| B06_35        | Prohits Administrator | 3       | [P1G1_IP47-G546.jpg] | B06       | 100.000     |         | 3        | None         |
| B07_36        | Prohits Administrator | 4       | [P1G1_IP47-G546.jpg] | B07       | 75.000      |         | 3        | None         |
| B08_37        | Prohits Administrator | 5       | [P1G1_IP47-G546.jpg] | B08       | 60.000      |         | 3        | None         |
| B09_38        | Prohits Administrator | 6       | [P1G1_IP47-G546.jpg] | B09       | 55.000      |         | 3        | None         |
| C02_34        | Prohits Administrator | 2       | [P1G1_IP47-G546.jpg] | C02       | 32.000      |         | 3        | None         |
| C04_1         | Prohits Administrator | 1       | [P1G1_IP47-G546.jpg] | C04       | 25.000      |         | 3        | None         |

January 12, 2010, 10:23 am

When setting up the acquisition on the mass spectrometer, the folder name (here **20080715\_YDP00155\_A1\_P1**) as well as the Raw file names (e.g. **B06\_35**) need to match these above.

## The Comparison tool

ProHits has a built-in comparison tool that allows you to look at the results of several experiments side-by-side. You can perform comparisons at the bait level or at the sample level, and compare the results from the search engines (e.g. Mascot or X!Tandem) or the TPP. For this demonstration, we will perform a comparison at the sample level, using the Mascot search engine.

### Comparison (Project: Demo Human Gel Free)

instructions [-]

- To use the Comparison tool, you must first have a project loaded.
- Multiple samples may be compared.
- In a bait comparison, the results are sorted by bait ID. In a sample comparison, the results are sorted by sample ID.
- Data may be merged or unmerged.
- Bait/Samples window
- When all Baits, Samples and/or groups are loaded and ready for comparison, press the [Generate Report] button.
- There are two types of color codes in the results page. The hit property color code indicates hit property values by color gradient. For example, the default hit property is total peptides (blue); the darker the shade, the higher the number of peptides observed. The shared hits color code is used to indicate hits in common between samples.

1) Select whether you want to compare Baits or Samples, and TPP or results from the search engines

2) The unselected baits are listed on the left side. Use the "Sort by" function to reorganize.

### fi Select the desired baits to be compared

You can sort by Bait ID, Gene name, Protein ID, or by any of the user-defined flags that were used for the project.

### fi Press the >> arrow button to transfer the baits to the "Selected Baits" window

You can transfer files one at the time, or by large groups. The files are added to the list in the order selected. This will also be the order of the columns in the Comparison View.

Use the green up/down arrows on the right hand side to reorganize the sort order. Individual Baits or Groups of Baits can be reorganized.

**Samples**

| BaitID | GeneName(Tag)      | SampleID | SampleName         |
|--------|--------------------|----------|--------------------|
| 10     | FLAG_alone(N-Flag) | 17       | FLAG_alone_pelletD |
| 10     | FLAG_alone(N-Flag) | 16       | FLAG_alone_pelletC |
| 7      | EIF4A2(N-Flag)     | 11       | EIF4A2_pelletD     |
| 7      | EIF4A2(N-Flag)     | 10       | EIF4A2_pelletC     |
| 6      | MEPCE(N-Flag)      | 9        | MEPCE_pelletB      |
| 6      | MEPCE(N-Flag)      | 8        | MEPCE_pelletA      |

**Selected Samples**

| BaitID | GeneName(Tag) | SampleID | SampleName   |
|--------|---------------|----------|--------------|
| 8      | WASL          | 12       | WASL_pelletA |
| 8      | WASL          | 13       | WASL_pelletB |
| 9      | RAF1          | 14       | RAF1_pelletA |
| 9      | RAF1          | 15       | RAF1_pelletB |

**Merge groups**  
new group color

Control  
 Unmerge

Sort by group type:  Bait  Experiment  Sample

Select Samples(s) by clicking, then press the [>>] key. Selected Samples are displayed on the right side

Use up/down arrows to reorganize the selected baits for Comparison

### Merging files prior to Comparison

Additional options are available that provide merging options for two or more files. *Please note that the merging is a very simple process that simply reports the best hits for the item but does not do any recalculation. If the selected display option in the report is the Mascot score, the best scoring hit will be listed; if the selected display option is based on spectral counts, the hit with the highest spectral counts will be reported.* The merging function allows you to group two or more control runs (click on the "Control" button before transferring the selected files).

**Samples**

| BaitID | GeneName(Tag) | SampleID | SampleName    |
|--------|---------------|----------|---------------|
| 6      | MEPCE(N-Flag) | 9        | MEPCE_pelletB |
| 6      | MEPCE(N-Flag) | 8        | MEPCE_pelletA |

**Selected Samples**

| BaitID | GeneName(Tag)      | SampleID | SampleName         |
|--------|--------------------|----------|--------------------|
| 10     | FLAG_alone(N-Flag) | 17       | FLAG_alone_pelletD |
| 10     | FLAG_alone(N-Flag) | 16       | FLAG_alone_pelletC |
| 8      | WASL               | 12       | WASL_pelletA       |
| 8      | WASL               | 13       | WASL_pelletB       |
| 9      | RAF1               | 14       | RAF1_pelletA       |
| 9      | RAF1               | 15       | RAF1_pelletB       |
| 7      | EIF4A2(N-Flag)     | 11       | EIF4A2_pelletD     |
| 7      | EIF4A2(N-Flag)     | 10       | EIF4A2_pelletC     |

**Merge groups**  
new group color

Control  
 Unmerge

You can group any set of additional files by first clicking on the multicolour icon to select a new group, then transferring the given files to the right side. The listing order will be as follows: The control group will be listed first, followed by all other groups in the order selected by the user, followed by all individual entries in the order selected by the user. Note that within the same group, hits will be combined, and only the maximal value for each of the properties will be reported.

1) To combine multiple Baits into one group, click first on the multicolour icon and select desired colour

The screenshot shows the 'Merge groups' dialog box in the Analyst module. The dialog has a 'new group color' section with a multicolored grid. A red arrow points to the grid, and another red arrow points to the 'Control' radio button, which is selected. The 'Unmerge' radio button is unselected. The background shows a table of 'Selected Samples' with two rows highlighted in yellow.

| BaitID | GeneName(Tag)      | SampleID | SampleName         |
|--------|--------------------|----------|--------------------|
| 10     | FLAG_alone(N-Flag) | 17       | FLAG_alone_pelletD |
| 10     | FLAG_alone(N-Flag) | 16       | FLAG_alone_pelletC |

2) Select and transfer the files as above; the selected files are now grouped and highlighted with the desired colour

The screenshot shows the 'Selected Samples' table in the Analyst module. The table has four rows highlighted in yellow and two rows highlighted in green. The 'Merge groups' dialog box is open, and the 'Control' radio button is selected. A red arrow points to the 'Control' radio button, and another red arrow points to the 'Unmerge' radio button.

| BaitID | GeneName(Tag)      | SampleID | SampleName         |
|--------|--------------------|----------|--------------------|
| 10     | FLAG_alone(N-Flag) | 17       | FLAG_alone_pelletD |
| 10     | FLAG_alone(N-Flag) | 16       | FLAG_alone_pelletC |
| 6      | MEPCE(N-Flag)      | 9        | MEPCE_pelletB      |
| 6      | MEPCE(N-Flag)      | 8        | MEPCE_pelletA      |

3) Multiple groups of this type can be created in the same manner. If you want to add single files, first select the "unmerge" button, then browse in the file list

**fi When you are done adding all desired baits and/or bait groups, press [Generate Report]**  
This will open a new window, the Comparison page.

## Comparison page

When you open the Bait Comparison page, you will see an unfiltered view of the hits. Each column represents a different sample or bait (or group of samples or baits if the "merge" function was used). The rows represent each of the hits detected across the  $n$  samples or baits. Clicking on the Gene Name will take you to NCBI Gene; selecting [BioGrid] will open the BioGrid entry for the given protein; clicking on the number in the Protein ID field will bring you to the Entrez Protein page. The last column allows you to compare the peptides identified across the bait purifications.

**Sample Comparison**

Color code: Hit property color code  Shared hits color code

Sort by: Total Peptide Number  Sample ID  Control Group  Descending  Ascending

[ Click to apply filters ]

0 7 28 64 113 177 255 347 454 574 709 Total Peptide Number

Update Frequency GO

[Cytoscape] [Export tab]

**Hits**

| Gene Name           | Protein   | Peptide Comparison |
|---------------------|-----------|--------------------|
| PRMT6 [BioGrid]     | 20070220  |                    |
| WDR77 [BioGrid]     | 13129110  |                    |
| KIF11 [BioGrid]     | 13699824  |                    |
| FLNA [BioGrid]      | 116063573 |                    |
| KRT1 [BioGrid]      | 119395750 |                    |
| IVNS1ABP [BioGrid]  | 24475847  |                    |
| HSPA1B [BioGrid]    | 167466173 |                    |
| TUBB [BioGrid]      | 29788785  |                    |
| TUBB2C [BioGrid]    | 5174735   |                    |
| LOC651751 [BioGrid] | 169218253 |                    |
| PRPS2 [BioGrid]     | 4506129   |                    |
| PRPSAP2 [BioGrid]   | 4506133   |                    |
| TUBB2A [BioGrid]    | 4507729   |                    |
| CLNS1A [BioGrid]    | 4502891   |                    |
| CCT8 [BioGrid]      | 48762932  |                    |

Rows list individual hits. Click on gene name to go to NCBI gene, [BioGrid] to view interactions for this protein, Protein ID to open the NCBI Protein page, and Peptide Comparison to view peptide details.

Columns list baits or groups of baits

Numbers and color coding display the selected property (here, total peptides). Mousing over a hit will pop-up another box with hit details.

Change sorting options

Select to expand filter options

The default display is with Total Peptide Numbers (spectral counts), and the default sorting option is by descending number of spectra, starting by the left-most bait or group. Note that these sorting options can be modified. In particular, ProHits recalculates and sorts using the following parameters:

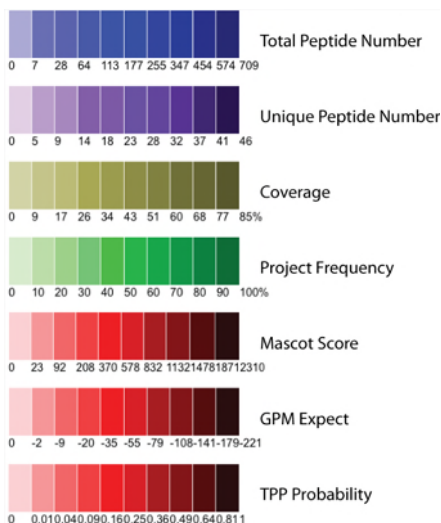

In addition to the sorting options, ProHits Comparison allows you to filter your data in a manner similar to the filtering options in the Bait Report page.

**fi To access the filtering option, select [Click to apply filters].**

An expanded menu allows you to select criteria for removal of proteins from the Comparison list.

**fi Select desired parameters**

**fi Select to highlight the BioGrid overlap if desired**

**fi To apply filters, press [Go]**

This generates a modified list, similar to the process described in the Bait report section. If selected, the overlap with BioGrid is indicated by stars or triangles in the list below.

Note that mousing over any of the entries shown below will pop up a menu box listing the scoring details.

## Sample Comparison

| Gene Name        | Protein ID | Peptide Comparison |
|------------------|------------|--------------------|
| MD14 [BioGrid]   | 194018537  |                    |
| RT3 [BioGrid]    | 195539395  |                    |
| PCE [BioGrid]    | 5031981    |                    |
| RP7 [BioGrid]    | 7661952    |                    |
| SM8 [BioGrid]    | 47271406   |                    |
| DOG [BioGrid]    | 109809739  |                    |
| PPF3 [BioGrid]   | 7706425    |                    |
| RT1 [BioGrid]    | 221136939  |                    |
| 015956 [BioGrid] | 53759134   |                    |
| PPH [BioGrid]    | 4758556    |                    |
| LSM4 [BioGrid]   | 217272892  |                    |
| CDK9 [BioGrid]   | 10863889   |                    |
| HEXIM1 [BioGrid] | 88988289   |                    |
| WDR57 [BioGrid]  | 5454154    |                    |
| LSM2 [BioGrid]   | 6912486    |                    |
| RPL27 [BioGrid]  | 4502747    |                    |
| LSM6 [BioGrid]   | 5453682    |                    |
| TXNL4A [BioGrid] | 10863977   |                    |
| LSM7 [BioGrid]   | 4506623    |                    |
| LSM5 [BioGrid]   | 5901998    |                    |
| NHP2L1 [BioGrid] | 5729802    |                    |
| RY1 [BioGrid]    | 7706423    |                    |
| LSM3 [BioGrid]   | 6912488    |                    |
| WIPF2 [BioGrid]  | 217330646  |                    |
| WIPF3 [BioGrid]  | 4826860    |                    |
| WIPF1 [BioGrid]  | 217330646  |                    |
| NCK2 [BioGrid]   | 24307919   |                    |
| RAF1 [BioGrid]   | 18959210   |                    |
| YWHAG [BioGrid]  | 122937496  |                    |
| YWHAQ [BioGrid]  | 38373695   |                    |
| YWHAH [BioGrid]  | 52630423   |                    |
| NRAS [BioGrid]   | 4506401    |                    |
| FKBP5 [BioGrid]  | 4506401    |                    |
| KRAS [BioGrid]   | 4758384    |                    |
| MLLT11 [BioGrid] | 15718761   |                    |
| HAX1 [BioGrid]   | 5802269    |                    |
| EIF4A2 [BioGrid] | 13435356   |                    |
| PCDD4 [BioGrid]  | 83700235   |                    |
| EIF3J [BioGrid]  | 21735596   |                    |
| EIF4G3 [BioGrid] | 83281438   |                    |
| EIF4G2 [BioGrid] | 10092601   |                    |
|                  | 4503539    |                    |

### Using Cytoscape directly from ProHits comparison

ProHits allows you to visualize your data using Cytoscape. If using the ProHits filters, the data post-filtering will be displayed (changing the filter will modify the display). If the BioGrid overlap function has been selected, the resulting Cytoscape view will incorporate both your mass spectrometry data, the overlap between your mass spectrometry data and data in BioGrid, and data detected only in BioGrid (including interactions amongst first neighbours of the hits). The colour-coding (see below) allows you to identify the source of the data.

Before you can use the Cytoscape plug-in, you need to have the Runtime Environment (JRE) installed on your local computer (you can use the following URL to test whether your computer has a functional JRE: <http://www.java.com/en/download/help/testum.xml>). The first time that you click the "Cytoscape" icon, Cytoscape will be installed on your local computer. Press the [Cytoscape] link immediately above the table to open the current interaction

file in Cytoscape. The baits are indicated by red nodes (alongside the unique bait identifier), and the recovery of baits in a purification is indicated by circling the white baits in red. The colour-coding of the arrows is mapped to the spectral counts, as shown above, and all peptide annotation is encoded as an edge attribute. Note that if the "Overlap with BioGrid" function has been selected, interactions specific to your dataset will be still shown in blue, interactions that overlap between your dataset and BioGrid will be shown in green, while BioGrid-only interactions will be displayed in white.

The original image is a circular layout; in the example shown here, this has simply been converted to a spring-embedded layout, with weight on the edge (unique peptide).

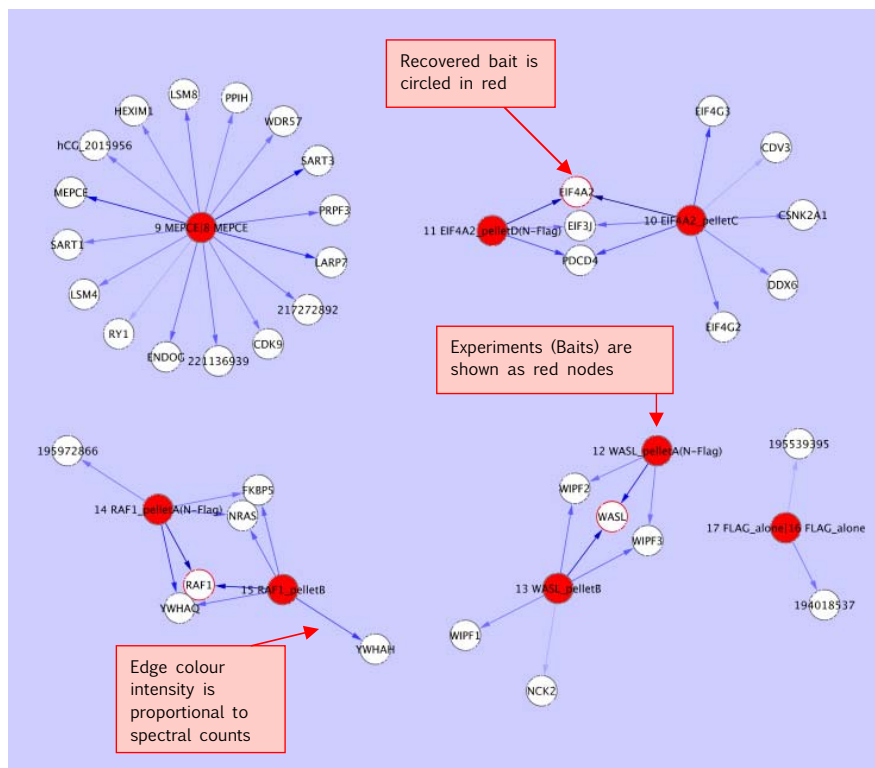

Note that all of the standard Cytoscape tools are available.



### Other export options

You may also wish to launch Cytoscape (or additional network viewers) from an Excel Table, in which you can add annotation or other mapping options. To do so, use the **[Export (table)]** option, also located at the top of the table. This will create a .csv file that can be opened and modified in Excel. The file will be displayed as a bait>hit list with each subsequent column listing a separate parameter. These lists are easily opened using a stand-alone Cytoscape version.

|    | A         | B                      | C             | D           | E              | F         | G              | H                     | I        | J         | K                |
|----|-----------|------------------------|---------------|-------------|----------------|-----------|----------------|-----------------------|----------|-----------|------------------|
| 1  | Sample ID | Bait Gene Name         | Hit Gene Name | Hit Gene ID | Hit Protein ID | Hit Score | Peptide Number | Unique Peptide Number | Coverage | Frequency | Shared Frequency |
| 2  | 10        | EIF4A2_pelletC(N-Flag) | EIF4A2        | 1974        | 83700235       | 1759      | 709            | 24                    | 71.5     | 60        | 20               |
| 3  | 11        | EIF4A2_pelletD(N-Flag) | EIF4A2        | 1974        | 83700235       | 1720      | 363            | 25                    | 64.6     | 60        | 20               |
| 4  | 14        | RAF1_pelletA(N-Flag)   | RAF1          | 5894        | 4506401        | 1620      | 353            | 20                    | 50.9     | 20        | 20               |
| 5  | 13        | WASL_pelletA(N-Flag)   | WASL          | 8976        | 51702526       | 1320      | 303            | 21                    | 60.4     | 20        | 20               |
| 6  | 15        | RAF1_pelletB(N-Flag)   | RAF1          | 5894        | 4506401        | 1560      | 258            | 20                    | 53.9     | 20        | 20               |
| 7  | 12        | WASL_pelletB(N-Flag)   | WASL          | 8976        | 51702526       | 1457      | 244            | 23                    | 57.2     | 20        | 20               |
| 8  | 9         | MEPCE_pelletB(N-Flag)  | SART3         | 9733        | 7661952        | 1683      | 242            | 24                    | 35.8     | 20        | 20               |
| 9  | 9         | MEPCE_pelletA(N-Flag)  | MEPCE         | 56257       | 47271406       | 1480      | 184            | 24                    | 53.7     | 20        | 20               |
| 10 | 9         | MEPCE_pelletB(N-Flag)  | LARP7         | 51574       | 109809739      | 1121      | 176            | 19                    | 33.5     | 20        | 20               |
| 11 | 14        | RAF1_pelletA(N-Flag)   | YWHAQ         | 7532        | 21464101       | 321       | 170            | 3                     | 27.1     | 20        | 20               |
| 12 | 14        | RAF1_pelletA(N-Flag)   | YWHAQ         | 10971       | 5803227        | 455       | 168            | 4                     | 26.5     | 20        | 20               |
| 13 | 14        | RAF1_pelletA(N-Flag)   | YWHAH         | 7533        | 4507951        | 295       | 166            | 3                     | 22.8     | 20        | 20               |
| 14 | 8         | MEPCE_pelletA(N-Flag)  | MEPCE         | 56257       | 47271406       | 1106      | 152            | 19                    | 43.8     | 20        | 20               |
| 15 | 15        | RAF1_pelletB(N-Flag)   | YWHAH         | 7533        | 4507951        | 472       | 107            | 4                     | 33.3     | 20        | 20               |
| 16 | 8         | MEPCE_pelletA(N-Flag)  | SART3         | 9733        | 7661952        | 1463      | 105            | 20                    | 26.9     | 20        | 20               |
| 17 | 10        | EIF4A2_pelletC(N-Flag) | EIF4G3        | 8672        | 10092601       | 1598      | 76             | 25                    | 23.3     | 20        | 10               |

**[Export (matrix)]** provides a view similar to that displayed in the Comparison page, with the option to export only the parameter currently displayed (e.g. spectral counts), or the option to list all parameters inside each cell. Again, a .csv file that can be opened and modified in Excel will be created.

View only the displayed value (here = total peptide counts):

|    | A                               | B         | F                                                                                             | G                    | H                    |  |
|----|---------------------------------|-----------|-----------------------------------------------------------------------------------------------|----------------------|----------------------|--|
| 1  | Generated date: 2010-January-15 |           | Project Name: Demo Human Gel Free                                                             |                      |                      |  |
| 2  | PID:SC(PT-PU-C%-F%-SF%)         |           | Peptide ID:Score(Total Peptide Number-Unique Peptide Number-Coverage-Frequency-Sub Frequency) |                      |                      |  |
| 3  |                                 |           |                                                                                               |                      |                      |  |
| 4  |                                 |           | 17 FLAG_alone_pelletD 8 MEPCE_pelletA(N-Flag) 9 MEPCE_pelletB(N-Flag)                         |                      |                      |  |
| 5  |                                 |           |                                                                                               |                      |                      |  |
| 6  | Gene ID                         | Gene Name | Total Peptide Number                                                                          | Total Peptide Number | Total Peptide Number |  |
| 7  | 194018537                       |           | 18                                                                                            |                      |                      |  |
| 8  | 195539395                       |           | 6                                                                                             |                      |                      |  |
| 9  | 10213                           | PSMD14    | 4                                                                                             |                      |                      |  |
| 10 | 56257                           | MEPCE     |                                                                                               | 152                  | 184                  |  |
| 11 | 9733                            | SART3     |                                                                                               | 105                  | 242                  |  |
| 12 | 51574                           | LARP7     |                                                                                               | 53                   | 176                  |  |
| 13 | 51691                           | LSM8      |                                                                                               | 49                   | 35                   |  |
| 14 | 217272892                       |           |                                                                                               | 26                   | 30                   |  |
| 15 | 9129                            | PRPF3     |                                                                                               | 26                   | 32                   |  |
| 16 | 221136939                       |           |                                                                                               | 25                   | 40                   |  |
| 17 | 25804                           | LSM4      |                                                                                               | 17                   | 11                   |  |
| 18 | 1025                            | CDK9      |                                                                                               | 16                   |                      |  |
| 19 | 2021                            | ENDOG     |                                                                                               | 15                   | 34                   |  |
| 20 | 10614                           | HEXIM1    |                                                                                               | 12                   |                      |  |
| 21 | 57819                           | LSM2      |                                                                                               | 8                    | 9                    |  |

View all parameters:

|    | A                               | B         | D                                                                                                           | E                    | F                    | G                    | H                    |
|----|---------------------------------|-----------|-------------------------------------------------------------------------------------------------------------|----------------------|----------------------|----------------------|----------------------|
| 1  | Generated date: 2010-January-15 |           | Project Name: Demo Human Gel Free                                                                           |                      |                      |                      |                      |
| 2  | PID:SC(PT-PU-C%-F%-SF%)         |           | Peptide ID:Score(Total Peptide Number-Unique Peptide Number-Coverage-Frequency-Sub Frequency)               |                      |                      |                      |                      |
| 3  |                                 |           |                                                                                                             |                      |                      |                      |                      |
| 4  |                                 |           | 16 FLAG_alone_pelletC(N-Flag) 17 FLAG_alone_pelletD(N-Flag) 8 MEPCE_pelletA(N-Flag) 9 MEPCE_pelletB(N-Flag) |                      |                      |                      |                      |
| 5  |                                 |           |                                                                                                             |                      |                      |                      |                      |
| 6  | Gene ID                         | Gene Name | Protein ID                                                                                                  | Total Peptide Number | Total Peptide Number | Total Peptide Number | Total Peptide Number |
| 7  | 194018537                       |           | 194018537                                                                                                   |                      |                      | 18                   |                      |
| 8  | 195539395                       |           | 195539395                                                                                                   |                      |                      | 6                    |                      |
| 9  | 10213                           | PSMD14    | 5031981                                                                                                     |                      |                      | 4                    |                      |
| 10 | 56257                           | MEPCE     | 47271406                                                                                                    |                      |                      |                      | 152                  |
| 11 | 9733                            | SART3     | 7661952                                                                                                     |                      |                      |                      | 105                  |
| 12 | 51574                           | LARP7     | 109809739                                                                                                   |                      |                      |                      | 53                   |
| 13 | 51691                           | LSM8      | 7706425                                                                                                     |                      |                      |                      | 49                   |
| 14 | 217272892                       |           | 217272892                                                                                                   |                      |                      |                      | 26                   |
| 15 | 9129                            | PRPF3     | 4758556                                                                                                     |                      |                      |                      | 26                   |
| 16 | 221136939                       |           | 221136939                                                                                                   |                      |                      |                      | 25                   |
| 17 | 25804                           | LSM4      | 6912486                                                                                                     |                      |                      |                      | 17                   |
| 18 | 1025                            | CDK9      | 4502747                                                                                                     |                      |                      |                      | 16                   |
| 19 | 2021                            | ENDOG     | 53759134                                                                                                    |                      |                      |                      | 15                   |
| 20 | 10614                           | HEXIM1    | 5453682                                                                                                     |                      |                      |                      | 12                   |
| 21 | 57819                           | LSM2      | 10863977                                                                                                    |                      |                      |                      | 8                    |

**Zoom of the details inside each cell:**

PID:SC(PT-PU-C%-F%-SF%)

56790935:500(16-10-20.70-11.88-75)

Legend:

PID: Protein ID (NCBI Entrez Protein)

SC: Mascot Score

PT: Total number of peptides

PU: Number of Unique peptides

C%: Percentage of the protein sequenced

F%: Frequency of occurrence of the protein in the entire dataset

SF%: Frequency of occurrence of the protein amongst compared baits/samples

## Comparing larger numbers of baits

ProHits also allows you to visualize larger numbers of experiments.

**fi Select the baits or samples to be compared and press [Generate Report]**

A heat-map view of the data will be generated.

### Bait Comparison

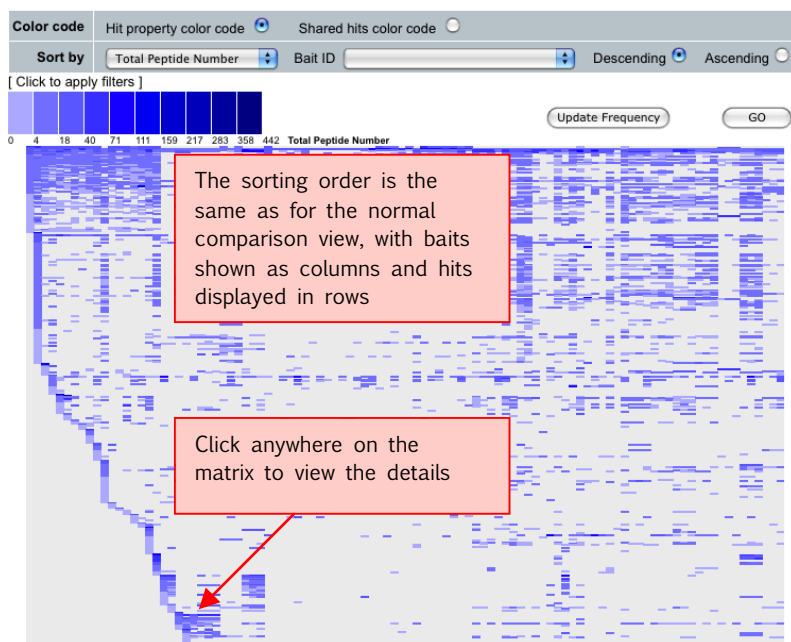

**fi Click anywhere on the map to expand and view names and other details**

| Gene Name       | Protein ID | Links | Peptide Comparison |
|-----------------|------------|-------|--------------------|
| CC11 [BioGrid]  | 6323282    | [SGD] | [Comparison]       |
| Y1B3 [BioGrid]  | 6320668    | [SGD] | [Comparison]       |
| KIN28 [BioGrid] | 6320596    | [SGD] | [Comparison]       |
| ISE1 [BioGrid]  | 6323033    | [SGD] | [Comparison]       |
| RAC3 [BioGrid]  | 6321918    | [SGD] | [Comparison]       |
| GC19 [BioGrid]  | 6321999    | [SGD] | [Comparison]       |
|                 | 9996322865 |       |                    |
|                 | 9996319111 |       |                    |
|                 | 9996323454 |       |                    |
| YAP3 [BioGrid]  | 6321778    | [SGD] | [Comparison]       |
|                 | 9996324660 |       |                    |
| PHO85 [BioGrid] | 6325226    | [SGD] | [Comparison]       |
| PHO81 [BioGrid] | 6321672    | [SGD] | [Comparison]       |
| PC18 [BioGrid]  | 6320537    | [SGD] | [Comparison]       |
| PHO80 [BioGrid] | 6324573    | [SGD] | [Comparison]       |
| G0Y2 [BioGrid]  | 6323287    | [SGD] | [Comparison]       |
| PC16 [BioGrid]  | 6320961    | [SGD] | [Comparison]       |

Note, however, that due to file size, the [Cytoscape] option is not available with this heat map view. The [Export(table)] option is still available, however, and can allow you to upload data into a stand-alone Cytoscape session (the [Export(matrix)] function is also available). Note that due to large file sizes, these export functions may run slowly.

For additional export functionalities, you can go back to the main Analyst module, and select the "Export Hits" option from the left-hand menu.

## Automatically adding baits for comparison from the baits or sample report list pages

ProHits allows you to select baits or samples to be added to the comparison page while working on other pages. To use this option, simply click the box located to the left side of each sample in the sample list or by the bait in the bait list.

### Samples (Project: Demo Human Gel Free)

Column Display Set  

Experiment status color keys [+]

 select to compare

| Sample ID ▾                            | Sample Name        | BaitID | BaitGene   |
|----------------------------------------|--------------------|--------|------------|
| <input checked="" type="checkbox"/> 17 | FLAG_alone_pelletD | 10     | FLAG_alone |
| <input checked="" type="checkbox"/> 16 | FLAG_alone_pelletC | 10     | FLAG_alone |
| <input type="checkbox"/> 15            | RAF1_pelletB       | 9      | RAF1       |
| <input type="checkbox"/> 14            | RAF1_pelletA       | 9      | RAF1       |
| <input checked="" type="checkbox"/> 13 | WASL_pelletB       | 8      | WASL       |
| <input checked="" type="checkbox"/> 12 | WASL_pelletA       | 8      | WASL       |
| <input type="checkbox"/> 11            | EIF4A2_pelletD     | 7      | EIF4A2     |
| <input type="checkbox"/> 10            | EIF4A2_pelletC     | 7      | EIF4A2     |
| <input type="checkbox"/> 9             | MEPCE_pelletB      | 6      | MEPCE      |
| <input type="checkbox"/> 8             | MEPCE_pelletA      | 6      | MEPCE      |

The selected sample (or baits) will be automatically added to the "Selected Samples" and "Selected Baits" pages of the Comparison view. Note that if a bait is selected, all samples corresponding to this bait will automatically be added to the comparison view.

You can keep browsing and adding baits or samples for Comparison as you go. These will stay selected for the duration of your session, or until you manually remove them from the Comparison page.

## Search options

ProHits Analyst allows you to perform simple searches (for individual Gene Names) or Advanced searches (for multiple gene names or keywords in the protein description field or controlled vocabulary). Here, we will briefly review these options:

### Simple Search (Gene name)

ProHits has a simple search function that is located at the upper corner of the Analyst module main page.

**fi Enter an official Gene Name, then press the right pointing arrow.**



1) Type a gene name, then click the black arrow.

2) ProHits queries your project for instances of this gene name and indicates matches. Click [Browse] to explore matches.

This lists all instances of this Gene name across your project. Use the [Browse buttons] to navigate through the data. Below, we have expanded the "Hit (Report by Sample)" option. The gene SART3 was identified in both of the MEPCE biological replicates. Note that the column "Score of Probability/ # Peptides" refers to the score from the search engines (or TPP) and the total number of peptides identified for SART3 in the MEPCE runs.

### Search hits for "sart3" (Project: Demo Human Gel Free)

Column Display Set

Experiment status color keys

Sample groups

| Sample ID                  | Sample Name   | BaitID | BaitGene | User                  | Date       | Exp. Status  |                               |                                     |                                 | Score or Probability / # Peptide | Options    |                                  |
|----------------------------|---------------|--------|----------|-----------------------|------------|--------------|-------------------------------|-------------------------------------|---------------------------------|----------------------------------|------------|----------------------------------|
|                            |               |        |          |                       |            | Show groups: | <input type="checkbox"/> Bait | <input type="checkbox"/> Experiment | <input type="checkbox"/> Sample |                                  |            | <input type="checkbox"/> Version |
| <input type="checkbox"/> 9 | MEPCE_pelletB | 6      | MEPCE    | Prohits Administrator | 2010-01-05 |              | 11504                         |                                     |                                 |                                  | 1683 / 242 |                                  |
| <input type="checkbox"/> 8 | MEPCE_pelletA | 6      | MEPCE    | Prohits Administrator | 2010-01-05 |              | 11369                         |                                     |                                 |                                  | 1683 / 105 |                                  |

## Advanced Search

The Advanced Search function can be accessed from the menu bar. This function allows you to search for keywords (or combinations of keywords) and retrieve entries across the following categories: **Baits, Hits, Samples, Gels, Raw Files** and **Auto Search**.

In the simplest sense, you can use the Advanced search in a manner similar to the Simple search, i.e. to retrieve entries associated with a gene name. You can use "wildcards", either at the front, at the end, or both at the front and end of your query. Note that using wildcards (especially at the front) decreases search speed.

The screenshot shows the Advanced Search interface with several callout boxes:

- Specify keyword(s) to be searched**: Points to the "Word(s) or value(s) to query:" input field.
- Use wildcards**: Points to the "Add wildcard:" section with radio buttons for "at the end", "at the front", "front and end", and "no wildcard".
- Perform logical operations**: Points to the "Find:" section with radio buttons for "at least one of the words (separated by a space character)", "all words (separated by a space character)", and "the exact phrase", and a checkbox for "include description".
- Also search in the "Description" fields**: Points to the "Experiment Detail:" input field.
- Search (or limit searches) using controlled vocabulary for Experimental Details**: Points to the "[select] [remove]" buttons next to the "Experiment Detail:" field.
- Limit searches by date**: Points to the "Date:" input field and its "[select] [remove]" buttons.

A "Search" button is located at the bottom center of the interface.

This will return a list of results that you can then explore further by selecting the [Browse] option for each of the categories, as for the simple search.

### Other keywords that can be searched:

In addition to the Gene Name, different keywords can be searched. The fields searched depend upon the category, as defined below:

- 1) **Bait** (the keywords were detected in the entry for a bait – fields searched are “Gene Name”, “Gene ID”, “Locus Tag”, “Protein ID”, “Epitope Tag”, “Bait Mutation”, “Clone Number”, “Vector”, with optionally, Bait “Description”). The searched fields are indicated by red ovals below:

#### Baits (Project: Demo Human Gel Free)

The screenshot shows a 'Modify' form for a Bait entry. The fields and their values are as follows:

- Bait ID: 6
- Species: Homo sapiens (human)
- Gene Name: MEPCE
- Epitope Tag: N-Flag
- Bait Mutation: (empty)
- GeneID: 56257
- ProteinID: 47271406
- ProteinID Type: GI
- MW: 24.950 kDa
- Clone Number: N/A
- Description: AF264752\_1 unknown [Homo sapiens]

- 2) **Hits** (the keywords were detected in the hits list – field searched is “Gene” Name, with, optionally, Protein “Description”). You can similarly see the hits across TPP results. The searched fields are indicated by red ovals below.

| Mascot Hits |          | GPM Hits      | Mascot TPP Hits | Mascot TPP Peptides | Other     |           |         |                                                                                 |
|-------------|----------|---------------|-----------------|---------------------|-----------|-----------|---------|---------------------------------------------------------------------------------|
| ID          | Protein  | Gene          | Score           | Expect              | Frequency | Redundant | MW kDa  | Description                                                                     |
| 415         | 47271406 | 56257 / MEPCE | 1106            |                     | 20%       |           | 74.310  | bin3; bicoid-interacting 3 [Homo sapiens]                                       |
| 425         | 4502491  | 708 / C1QBP   | 686             |                     | 100%      |           | 31.340  | complement component 1; q subcomponent binding protein precursor [Homo sapiens] |
| 413         | 7661952  | 9733 / SART3  | 1463            |                     | 20%       |           | 109.860 | squamous cell carcinoma antigen recognized by T cells 3 [Homo sapiens]          |

- 3) **Sample** (the keywords were detected in the user-defined “Sample Name”)
- 4) **Gel** (the keywords were detected in the fields “Gene Name”, “Gene Image”, and “Lane Code”)
- 5) **Raw files** (the keywords were detected in “File Name” or “Folder Name”). This brings you to the “Data management” module, and lists the folders / files bearing the selected keywords.
- 6) **Auto Search** (the keywords were detected in “Search Task Name”). This brings you to the “Data management” module, and lists the search tasks bearing the selected keywords.

**Searching Bait/Protein Description:** You can search for a keyword inside the Description field (e.g. "squamous" in the example above), by allowing wildcards on both sides. In other words, the entire field is captured (not individual words), and any partial field (e.g. "squamous" or "carcinoma") must be preceded and/or followed by wildcards. Note again that such searches may be very slow.

**Searching in Experimental Details (controlled vocabularies):** The search function also allows you to search (or limit your searches) based on selected controlled vocabulary. Simply press [Select] (bottom right corner of the Experimental Detail section). This will take you to the Experimental Details/controlled vocabulary section where you can select categories/values to be passed to the Advanced search page.

**Restricting searches by date:** You can restrict search results by date. Simply press the [select] button in the Date field to open a drop-menu.

**Using logical operations:** You can combine several keywords (simply separate them by spaces), to search for "at least one of the words", "all words" (in any order), or "the exact phrase" within a field, such as "Description". Note that the "all words" and "exact phrase" operations only apply within a field. Alternatively, you can use the "at least one of the words" option to search for different keywords even across different fields. This will generate a list of results that will be the union of the separate lists.

**Hits searches returning too many results:** Note that there is a limit of 3000 to search results. Try narrowing down your search parameters and try again.

**Example:** Searching for squamous AND carcinoma in 293 Flp-In T-REx cells and in anti tag coimmunoprecipitation; date restricted to January 2009 – January 2010.

## Advanced Search (Project: Demo Human Gel Free)

instructions [+]

|                               |                                                                                                                                                                                                                                                                      |                                    |                                                                                  |
|-------------------------------|----------------------------------------------------------------------------------------------------------------------------------------------------------------------------------------------------------------------------------------------------------------------|------------------------------------|----------------------------------------------------------------------------------|
| Word(s) or value(s) to query: | squamous carcinoma                                                                                                                                                                                                                                                   |                                    |                                                                                  |
| Add wildcard:                 | at the end <input type="radio"/>                                                                                                                                                                                                                                     | at the front <input type="radio"/> | front and end <input checked="" type="radio"/> no wildcard <input type="radio"/> |
| Find:                         | <input type="radio"/> at least one of the words (separated by a space character)<br><input checked="" type="radio"/> all words (separated by a space character)<br><input type="radio"/> the exact phrase<br><input checked="" type="checkbox"/> include description |                                    |                                                                                  |
| Experiment Detail:            | Interaction detection method (MI:0007 anti tag coimmunoprecipitation) AND Cell type (293 Flp-In T-REx Invitrogen)                                                                                                                                                    |                                    | [select] [remove]                                                                |
| Date:                         | 2009-01 To 2010-01                                                                                                                                                                                                                                                   | [select]                           | [remove]                                                                         |

Search

## Uploading search results

The Analyst module allows you to import search results from the TransProteomics Pipeline (TPP), Mascot or GPM/X!Tandem. This function is very useful for laboratories that are not interested in the Data Management module of ProHits, e.g. if they are using a third party analysis solution. All that is needed for this section are the search results files or both TPP ProteinProphet and TPP PeptideProphet XML files.

fi Select the [Upload Search Results] link on the left hand side of the Analyst module.

This opens up the list of all the baits that you have created in the Analyst module.

     

### Upload Search Results (Project: Demo Human Gel Free)

Total Bands : 11 (1 Page) 1

| Bait ID | Bait Gene           | Experiment<br>Exp / Gel / Lane (LaneNum) | Sample ID | Sample Name        | Uploaded By | Uploaded date | Uploaded File | Options                                                                                                                                                                     |
|---------|---------------------|------------------------------------------|-----------|--------------------|-------------|---------------|---------------|-----------------------------------------------------------------------------------------------------------------------------------------------------------------------------|
| 20      | COP55(N-Flag.)      | COP55 gel free                           | 39        | COP55              |             |               |               |                                                                                          |
| 10      | FLAG_alone(N-Flag.) | FLAG_alone_pelletC gel free              | 16        | FLAG_alone_pelletC |             |               |               |       |
|         |                     | FLAG_alone_pelletD gel free              | 17        | FLAG_alone_pelletD |             |               |               |       |
| 9       | RAF1(N-Flag.)       | RAF1_pelletA gel free                    | 14        | RAF1_pelletA       |             |               |               |       |
|         |                     | RAF1_pelletB gel free                    | 15        | RAF1_pelletB       |             |               |               |       |
| 8       | WASL(N-Flag.)       | WASL_pelletA gel free                    | 12        | WASL_pelletA       |             |               |               |       |
|         |                     | WASL_pelletB gel free                    | 13        | WASL_pelletB       |             |               |               |       |
| 7       | EIF4A2(N-Flag.)     | EIF4A2_pelletC gel free                  | 10        | EIF4A2_pelletC     |             |               |               |       |
|         |                     | EIF4A2_pelletD gel free                  | 11        | EIF4A2_pelletD     |             |               |               |   |
| 6       | MEPCE(N-Flag.)      | MEPCE_pelletA gel free                   | 8         | MEPCE_pelletA      |             |               |               |   |
|         |                     | MEPCE_pelletB gel free                   | 9         | MEPCE_pelletB      |             |               |               |   |

Total Bands : 11 (1 Page) 1

fi Select the upload option  at the end of the desired sample

This pops up a new page:

### Upload Search Results

| Bait Information (20) <a href="#">[GI][Gene][BioGrid]</a> |       |                  |                                                      |
|-----------------------------------------------------------|-------|------------------|------------------------------------------------------|
| Bait Gene ID                                              | 10987 | Bait Gene Name   | COP55 (N-Flag)                                       |
| Bait Locus Tag                                            |       | Bait MW (kDa)    | 37.560                                               |
| Bait Clone                                                | N/A   | Bait Description | Jun activation domain binding protein [Homo sapiens] |

| Experiment Information |                 |                                                                                                                |                                                                                     |                       |            |
|------------------------|-----------------|----------------------------------------------------------------------------------------------------------------|-------------------------------------------------------------------------------------|-----------------------|------------|
| Experiment ID          | Name/Batch Name | Exp. Detail                                                                                                    | Exp. Status:                                                                        | Inputed by            | Date       |
| 32                     | COP55           | Interaction detection method : MI:0007 anti tag coimmunoprecipitation; Cell type : 293 Flp-In T-REx Invitrogen | 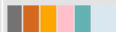 | Prohits Administrator | 2010-01-15 |

| Sample Information |             |                       |
|--------------------|-------------|-----------------------|
| Sample ID          | Sample Code | Submitted by          |
| 39                 | COP55       | Prohits Administrator |

Upload Search Results File Type:  TPP  Mascot  GPM

fi Select the type of search results files you wish to upload (TPP, Mascot, GPM/X!Tandem), and Browse your local computer for the files in the right format.



fi Press [Submit] to upload search results.

Upload Search Results File Type:  TPP  Mascot  GPM

**Browse TPP Files**

TPP ProteinProphet :   [select .xml file](#)

TPP PeptideProphet :   [select .xml file](#)

Upload max file size: 800M Post max size: 800M

Upload Search Results File Type:  TPP  Mascot  GPM

**Browse Mascot Files**

Mascot File :   [select .dat file](#)

**Filter**

Ions score cut-off <:   Require bold red peptide :

Save Protein score >   Max. number of hits :

Significance threshold p<:

Upload max file size: 800M Post max size: 800M

Upload Search Results File Type:  TPP  Mascot  GPM

**Browse GPM Files**

GPM File :   [select .xml file](#)

**Filter**

GPM Ions expect log(e) cut-off >

Save Protein expect log(e) <

Upload max file size: 800M Post max size: 800M

## Manage Protocols and Lists

Five types of Protocols and Lists pages are available in ProHits. With the exception of the "Epitope Tag Lists", that are applied to all projects on the local ProHits server, the other protocols and lists are only applicable to the current project. Lists and Protocols defined for a given project may be imported into a different project, so long as the user has access to both projects, and permission to modify individual lists and/or protocols. Access to individual pages of the "Manage Protocols and Lists" of the Analyst module is restricted via page permissions set in the admin office module. We suggest limiting the number of users having access to these management tools.

Here, we will briefly review the function of the different protocols and lists, then show a few examples for each category of protocol and/or list.

### Text-based protocols – pages 42-43

Text-based protocols provide details on the experimental procedures. We have separated the protocols into four modules: Biological Material (i.e. what type of cells, expression system, growth conditions, etc.), Affinity Purification (from cell lysis to elution), Peptide Preparation (including separation at the protein/peptide level after elution), and LC-MS conditions. For our internal use, we attempt in providing very detailed protocols that could be used for publication with only minor modifications.

### Experimental Editor – pages 44-45

The Experimental Editor allows you to create and manage the list of controlled vocabularies to be used within the Experimental Details page, in conjunction with the text-based protocols and additional notes. For our internal use, we attempt to capture information that would allow PSI MI 2.5 compliance, as well as other relevant information that would allow us to structure our data. Note that the terms entered in this section are searchable in the "Advanced Search" function.

### Background Lists – pages 46-48

This function allows you to define and manage one or more lists of contaminants and/or background proteins associated with a given project. For example, you could maintain individual lists of the proteins found to associate non-specifically with different affinity matrices. The proteins on a given "Background" list can be subtracted from the list of identified proteins, in Individual Report, Comparison, or Export views.

### Group Lists – pages 49-51

This function allows you to further organize and/or mark certain baits, experiments or samples by adding a colour-coded and user-defined icon that will appear in the Status bar of the Report by Bait or Report by Sample view. Useful Sample level group could include comments about the quality of the data, while Experiment level group would refer to some property of the experimental prep (e.g. phospho-enrichment), and a Bait level group could be the type of tag used. Additionally, ProHits allows you to mark (at the Sample level), samples that are to be included in publication (and/or to be exported to a third party).

### Epitope Tag Lists – page 52

This is the only list that applies to the entire local ProHits database. The objects in this list are available on the Bait entry page, and define the tag (if applicable) used for tagging of the bait. N or C refer to the position of the tag relative to the bait. When available, the epitope tags have been mapped back to the standard vocabularies from the Molecular Interaction PSI MI 2.5; an automated link to the Ontology Lookup Service (OLS). We strongly suggest using this service to enter the PSI MI 2.5 terms when entering new tags.

## Text-based protocols

### fi Select the "Text-based Protocols" entry from the Manage Protocols and Lists

*Protocols* (Project: Demo Human Gel Free) [\[Export protocols\]](#)

|                       |                           |                                              |                     |
|-----------------------|---------------------------|----------------------------------------------|---------------------|
| Biological Material   | <a href="#">[add new]</a> | <a href="#">[import from other projects]</a> | <a href="#">[+]</a> |
| Affinity Purification | <a href="#">[add new]</a> | <a href="#">[import from other projects]</a> | <a href="#">[+]</a> |
| Peptide Preparation   | <a href="#">[add new]</a> | <a href="#">[import from other projects]</a> | <a href="#">[+]</a> |
| LC-MS                 | <a href="#">[add new]</a> | <a href="#">[import from other projects]</a> | <a href="#">[+]</a> |

### fi Click **[add new]**, and paste or type your protocol. Then press **[Save]**.

Note 1: because the protocols are displayed as html and exported as a CSV or TSV file, certain characters and symbols will not display properly, and should be spelled out. Examples are  $\mu$  (u or micro),  $^{\circ}$  (degree), and ` (apostrophe).

Note 2: to each protocol is assigned a unique identifier. The protocol can be modified or even deleted as long as it has not been used. Once in use, modifications are no longer allowed and a new protocol (that will be assigned a different protocol number) will need to be created.

*Protocols* (Project: Demo Human Gel Free) [\[Export protocols\]](#)

|                                 |                                                                                                                                                                                                                                                                                                                                                                                                                                                                                                                                                                                                                                                                                                                                                                                                                                                                                                                                                                                                                                                                                                                                                                                                                                                                                                                                                                                                                                                                                                                                                                                                                                                                                                                                                                                                                                                                                                                                                                                                                                                                                                                                                                                                                                                                                         |                                              |                     |
|---------------------------------|-----------------------------------------------------------------------------------------------------------------------------------------------------------------------------------------------------------------------------------------------------------------------------------------------------------------------------------------------------------------------------------------------------------------------------------------------------------------------------------------------------------------------------------------------------------------------------------------------------------------------------------------------------------------------------------------------------------------------------------------------------------------------------------------------------------------------------------------------------------------------------------------------------------------------------------------------------------------------------------------------------------------------------------------------------------------------------------------------------------------------------------------------------------------------------------------------------------------------------------------------------------------------------------------------------------------------------------------------------------------------------------------------------------------------------------------------------------------------------------------------------------------------------------------------------------------------------------------------------------------------------------------------------------------------------------------------------------------------------------------------------------------------------------------------------------------------------------------------------------------------------------------------------------------------------------------------------------------------------------------------------------------------------------------------------------------------------------------------------------------------------------------------------------------------------------------------------------------------------------------------------------------------------------------|----------------------------------------------|---------------------|
| Biological Material             | <a href="#">[add new]</a>                                                                                                                                                                                                                                                                                                                                                                                                                                                                                                                                                                                                                                                                                                                                                                                                                                                                                                                                                                                                                                                                                                                                                                                                                                                                                                                                                                                                                                                                                                                                                                                                                                                                                                                                                                                                                                                                                                                                                                                                                                                                                                                                                                                                                                                               | <a href="#">[import from other projects]</a> | <a href="#">[-]</a> |
| <b>Tet Inducible Flp-In 293</b> |                                                                                                                                                                                                                                                                                                                                                                                                                                                                                                                                                                                                                                                                                                                                                                                                                                                                                                                                                                                                                                                                                                                                                                                                                                                                                                                                                                                                                                                                                                                                                                                                                                                                                                                                                                                                                                                                                                                                                                                                                                                                                                                                                                                                                                                                                         |                                              | <a href="#">[-]</a> |
| Protocol ID:                    | 10                                                                                                                                                                                                                                                                                                                                                                                                                                                                                                                                                                                                                                                                                                                                                                                                                                                                                                                                                                                                                                                                                                                                                                                                                                                                                                                                                                                                                                                                                                                                                                                                                                                                                                                                                                                                                                                                                                                                                                                                                                                                                                                                                                                                                                                                                      |                                              |                     |
| Protocol Type:                  | Biological Material                                                                                                                                                                                                                                                                                                                                                                                                                                                                                                                                                                                                                                                                                                                                                                                                                                                                                                                                                                                                                                                                                                                                                                                                                                                                                                                                                                                                                                                                                                                                                                                                                                                                                                                                                                                                                                                                                                                                                                                                                                                                                                                                                                                                                                                                     |                                              |                     |
| Project:                        | Demo Human Gel Free                                                                                                                                                                                                                                                                                                                                                                                                                                                                                                                                                                                                                                                                                                                                                                                                                                                                                                                                                                                                                                                                                                                                                                                                                                                                                                                                                                                                                                                                                                                                                                                                                                                                                                                                                                                                                                                                                                                                                                                                                                                                                                                                                                                                                                                                     |                                              |                     |
| Protocol Name:                  | Tet Inducible Flp-In 293                                                                                                                                                                                                                                                                                                                                                                                                                                                                                                                                                                                                                                                                                                                                                                                                                                                                                                                                                                                                                                                                                                                                                                                                                                                                                                                                                                                                                                                                                                                                                                                                                                                                                                                                                                                                                                                                                                                                                                                                                                                                                                                                                                                                                                                                |                                              |                     |
| Created by:                     | Prohits Administrator                                                                                                                                                                                                                                                                                                                                                                                                                                                                                                                                                                                                                                                                                                                                                                                                                                                                                                                                                                                                                                                                                                                                                                                                                                                                                                                                                                                                                                                                                                                                                                                                                                                                                                                                                                                                                                                                                                                                                                                                                                                                                                                                                                                                                                                                   |                                              |                     |
| Creation date:                  | 2010-01-05                                                                                                                                                                                                                                                                                                                                                                                                                                                                                                                                                                                                                                                                                                                                                                                                                                                                                                                                                                                                                                                                                                                                                                                                                                                                                                                                                                                                                                                                                                                                                                                                                                                                                                                                                                                                                                                                                                                                                                                                                                                                                                                                                                                                                                                                              |                                              |                     |
| Protocol Detail:                | Human [taxid:9606] cells [Flp-In T-REx 293 cells, passage 15 (from S. Angers' laboratory), were transfected in a 6 well format with 0.2 $\mu$ g of tagged DNA [pcDNA5-FLAG-protein] (OpenFreezer V4071) and 2 $\mu$ g pOG44 (OpenFreezer V4134), using lipofectamine PLUS (Invitrogen), according to the manufacturer's instructions. On day 2, cells were trypsinized, and passaged into 3 x 10 cm plates, in a two-fold dilution series. On day 3, the medium was replaced by DMEM 5% Fetal bovine serum 5% calf serum 100 units/ml pen/strep 200 $\mu$ g/ml hygromycin. Medium was replaced every 3 - 4 days until non-transfected cells die and isolated clones are ~2 mm in diameter (13-15 days). The clone position was marked at the bottom of the plates. [Stable cell clones] were picked by trypsinization using 2 mm sterile 3MM filter papers dipped into trypsin. Paper circles are transferred into 24 well plates, each well containing 1 ml of complete growth containing 10% Tet system-tested FBS (Clontech 631106) medium with hygromycin. Clones were amplified into 3 x 24 well plates; one plate was used for monitoring the expression level -tet; another 1 after adding tet (1 $\mu$ g/ml for 24 hours), and the other well was used to maintain cells. Selected clones were amplified (in selection medium), eventually to 8 x 15cm plates, one of them being used for freezing back a low passage stock (4 tubes), one for maintaining the culture, and 6 for induction and harvesting (these were grown without hygromycin prior to harvesting). Cells at ~60-70% confluence were induced with 1ug/ml tetracycline for 24 hours. Subconfluent cells (~85-95% confluent) were harvested as followed: medium was drained from the plate, 1 ml ice-cold PBS was added, and the cells were scraped (using a silicon cake spatula) and transferred to a 15 ml conical tube on ice. Cells were collected by centrifugation (5 min, 1500 G, 4°C), the PBS was aspirated, and cells were resuspended in 10 ml ice-cold PBS prior to centrifugation (5 min, 1500 G, 4°C). This step was repeated once more, remaining PBS is aspirated, and the weight of the cell pellet is determined. Cell pellets are frozen on dry ice, and transferred to -80°C until needed. |                                              |                     |
| Affinity Purification           | <a href="#">[add new]</a>                                                                                                                                                                                                                                                                                                                                                                                                                                                                                                                                                                                                                                                                                                                                                                                                                                                                                                                                                                                                                                                                                                                                                                                                                                                                                                                                                                                                                                                                                                                                                                                                                                                                                                                                                                                                                                                                                                                                                                                                                                                                                                                                                                                                                                                               | <a href="#">[import from other projects]</a> | <a href="#">[+]</a> |
| Peptide Preparation             | <a href="#">[add new]</a>                                                                                                                                                                                                                                                                                                                                                                                                                                                                                                                                                                                                                                                                                                                                                                                                                                                                                                                                                                                                                                                                                                                                                                                                                                                                                                                                                                                                                                                                                                                                                                                                                                                                                                                                                                                                                                                                                                                                                                                                                                                                                                                                                                                                                                                               | <a href="#">[import from other projects]</a> | <a href="#">[+]</a> |
| LC-MS                           | <a href="#">[add new]</a>                                                                                                                                                                                                                                                                                                                                                                                                                                                                                                                                                                                                                                                                                                                                                                                                                                                                                                                                                                                                                                                                                                                                                                                                                                                                                                                                                                                                                                                                                                                                                                                                                                                                                                                                                                                                                                                                                                                                                                                                                                                                                                                                                                                                                                                               | <a href="#">[import from other projects]</a> | <a href="#">[+]</a> |

Continue entering protocols as above. Alternatively, if a protocol of interest already exists in another project to which you have access, you can import it directly from that project.

fi Click [import from other projects], select desired project by clicking the >> button and pressing [Submit].

fi Click the green arrow to transfer the protocol from the source project to the destination project, modify if needed, and press [Save].

You can export protocols linked to a project to a CSV file that can be opened in Excel or similar programs. The "Detail" column contains the full text of the protocol.

| ID | Name                                           | Type                | Project Name        | Detail              | Creation Date | Creator               |
|----|------------------------------------------------|---------------------|---------------------|---------------------|---------------|-----------------------|
| 21 | Trypsin digestion on magnetic beads            | Peptide Preparation | Demo Human Gel Free | Proteins immobilize | 1/7/10        | Prohits Administrator |
| 17 | In-solution digest of IP samples               | Peptide Preparation | Demo Human Gel Free | Trypsin (1 ug Sigma | 1/7/10        | Prohits Administrator |
| 19 | Growth and gal induction for HTP yeast project | Biological Material | Demo Human Gel Free | Plasmids encoding c | 1/7/10        | Prohits Administrator |
| 15 | Tet Inducible Flip-In 293 clone                | Biological Material | Demo Human Gel Free | Human [taxid:9606   | 1/7/10        | Prohits Administrator |

## Experimental Editor

### fi Select the "Experimental Editor" entry from the Manage Protocols and Lists

You will see a list of the categories already defined for your project.

*Controlled Vocabularies* (Experimental Details)

Click "+" to add new selection or option

**Edit selection** [+]

|                              |     |
|------------------------------|-----|
| Interaction detection method | [+] |
|------------------------------|-----|

### fi To view the values already entered under the "interaction detection method" category, click on the [+] button to expand this category.

You can add additional values by typing their description and pressing [Add]. Values that are not yet linked to an entry are followed by a red **X**. Pressing **X** deletes the entry. Note that for this category, we have used PSI MI 2.5 terms, to facilitate later deposition in interaction databases.

*Controlled Vocabularies* (Experimental Details)

Click "+" to add new selection or option

**Edit selection** [+]

|                              |     |
|------------------------------|-----|
| Interaction detection method | [-] |
|------------------------------|-----|

|                                          |                                    |
|------------------------------------------|------------------------------------|
| MI:0007 anti tag coimmunoprecipitation   | [X]                                |
| MI:0006 anti bait coimmunoprecipitation  | [X]                                |
| MI:0096 pull-down                        | [X]                                |
| <input style="width: 80%;" type="text"/> | <input type="button" value="Add"/> |

### fi To define new categories, press the [+] button next to "Edit selection".

This allows you to enter a new category.

¶ To import a category from another project to which you have access, simply click the checkbox associated to the category under the Edit selection option to transfer the category (and associated values) to current project.

**Controlled Vocabularies** (Experimental Details)

Click "+" to add new selection or option

**Edit selection [-]**

**Add new selection** Interaction detection method

**Import selections from other objects**

| Selection     | Project             | User                  |                          |
|---------------|---------------------|-----------------------|--------------------------|
| Cell type     | Demo Yeast Gel Free | Prohits Administrator | <input type="checkbox"/> |
| Tissue source | Demo Yeast Gel Free | Prohits Administrator | <input type="checkbox"/> |

**Controlled Vocabularies** (Experimental Details)

Click "+" to add new selection or option

**Edit selection [-]**

**Add new selection** Interaction detection method

Cell type

Tissue source

**Import selections from other objects**

| Selection | Project | User |  |
|-----------|---------|------|--|
|-----------|---------|------|--|

**Controlled Vocabularies** (Experimental Details)

Click "+" to add new selection or option

**Edit selection [+]**

Interaction detection method

Cell type

|                             |                          |
|-----------------------------|--------------------------|
| HEK293 ATCC-1573            | <input type="checkbox"/> |
| 293 Flp-In T-REx Invitrogen | <input type="checkbox"/> |
| HeLa ATCC-CCL2              | <input type="checkbox"/> |
| Yeast BY4741 EFO_0000098    | <input type="checkbox"/> |

Tissue source

## Background Lists

In addition to the Bio Filters and Experimental Filters defined in the Admin Office module, ProHits allows you to define additional filters to remove non-specific (or background) proteins. These filters are project-specific and created within a bait (or sample) report page in the Analyst module. Several different filters can be associated with the same project (e.g. corresponding to different workflows used in the project). Creation of these filters requires administrator-level privileges. The filters can be created by adding proteins manually (one-by-one) to an existing list of contaminants. The filters can also be generated by uploading a list (or table) of hits identified in control run(s), in which case the mapping only requires the Entrez Gene ID field. You can also add multiple proteins at once from any other pre-existing list (e.g. in Excel). The mapping is via the NCBI Entrez Gene ID.

**fi Select the “Background Lists” entry from the Manage Protocols and Lists.**

**fi From the entry page, click on the  (modify) icon to upload a list of contaminant proteins.**

### Background (Non-specific) Lists

Non-specific or background protein datasets are user-defined. They may consist, for example, of proteins that adhere to resin in the absence of a bait, or of any other proteins that the user wishes to exclude. One project may be linked to multiple non-specific data sets. A single non-specific data set can be selected to filter hits both in the Bait (or Sample) Report and in the Comparison pages of the Analyst module. Only the Admin has permission to modify or add a non-specific (background) set.

**Project:** Demo Human Gel Free  
**Species:** Homo sapiens (human)

Modified by:                      Modified date:

Background Set:   [Add New] [Close Window]  
[Import from other projects]

| GeneID         | GeneName ▲ | Gene Alias | Links | Option |
|----------------|------------|------------|-------|--------|
| [Close Window] |            |            |       |        |

Note that an efficient method to generate a non-specific filter set utilizes the ProHits comparison tool. First, select multiple control runs and merge them into a single “Control” group. This will open up a Comparison page with a single column called “Control Group” displayed in yellow. As before, the maximal value for the parameter visualized is displayed (e.g. spectral count). Apply filters (e.g. number of unique peptides, protein coverage, etc.) desired, and select [Export(table)] to export a comma-delimited file (\*.csv). Save this file on your hard drive, and go to any Bait report page. (Note that any Excel or text file that lists the NCBI Gene ID may also be used).

fi Browse the file to be uploaded, select delimiter, and press [upload file].

fi Select the "add as new" radio button and type a name (here: FLAG\_top\_contaminants).

Alternatively, append to an existing list by using the dropdown menu.

fi Select the row to start importing, and check the radio button in the GeneID field. Then, click [Process File].

*Non-specific (background)* Add / Modify Set

Upload File:  Browse... Upload File

Field Delimiter:  Comma  Tab  Space

Set Name:  Add as new FLAG\_top\_contaminants  
 Append to existing ----Select a group----

Transfer first line as attribute name Start Import Row

Select EntrezGeneID Field

| <input checked="" type="radio"/> Gene ID | <input type="radio"/> Gene Name | <input type="radio"/> LocusTag | <input type="radio"/> PID:SC(PT-PU-C%-F%-SF%) | <input type="radio"/> PID:SC(PT-PU-C%-F%-SF%) |
|------------------------------------------|---------------------------------|--------------------------------|-----------------------------------------------|-----------------------------------------------|
| 60                                       | ACTB                            |                                | 4501885:821(94-12-43.70-92.59-100)            | 4501885:1058(113-16-5)                        |
| 11329                                    | STK38                           |                                | 6005814:1118(80-17-48.20-92.06-100)           | 6005814:1391(101-25-5)                        |
| 203068                                   | TUBB                            | DAQB-47P19.9                   | 29788785:1246(49-19-51.60-91.53-100)          | 29788785:611(26-10-31)                        |
| 58                                       | ACTA1                           |                                | 4501881:488(48-4-39.00-84.66-83.3)            |                                               |
| 10383                                    | TUBB2C                          | RP13-122B23.2                  | 5174735:1104(43-4-48.10-91.01-100)            | 5174735:559(23-2-29.4)                        |
| 3832                                     | KIF11                           |                                | 13699824:1104(38-20-26.90-70.9-75)            |                                               |
| 873                                      | CBR1                            |                                | 4502599:988(37-15-60.30-59.26-75)             | 4502599:749(32-12-48)                         |

Once the file is processed, the contaminant list will be displayed (after selecting the name in the dropdown menu). You can manually remove individual entries (they will not be on the background list) by clicking the "delete" icon.

### Background (Non-specific) Lists

Non-specific or background protein datasets are user-defined. They may consist, for example, of proteins that adhere to resin in the absence of a bait, or of any other proteins that the user wishes to exclude. One project may be linked to multiple non-specific data sets. A single non-specific data set can be selected to filter hits both in the Bait (or Sample) Report and in the Comparison pages of the Analyst module. Only the Admin has permission to modify or add a non-specific (background) set.

Project: **Demo Human Gel Free**  
 Species: **Homo sapiens (human)**

Modified by: Prohits Administrator

Modified date: 2010-01-09

Background Set: FLAG\_top\_contaminant

[\[Add New\]](#) [\[Close Window\]](#)  
[\[Import from other projects\]](#)

| GeneID | GeneName | Gene Alias                                                                             | Links                                               | Option                           |
|--------|----------|----------------------------------------------------------------------------------------|-----------------------------------------------------|----------------------------------|
| 58     | ACTA1    | ACTA<br>ASMA<br>CFTD<br>CFTD1<br>CFTDM<br>MPPD<br>NEM1<br>NEM2<br>NEM3<br>RPS-1068B5.2 | <a href="#">[Gene]</a><br><a href="#">[BioGrid]</a> | <input type="button" value="A"/> |
| 345651 | ACTBL2   | ACT<br>DKFZp686D0972                                                                   | <a href="#">[Gene]</a><br><a href="#">[BioGrid]</a> | <input type="button" value="A"/> |
| 498    | ATPSA1   | ATPSA<br>ATPSAL2<br>ATPM<br>MOM2<br>OMR<br>ORM<br>hATP1                                | <a href="#">[Gene]</a><br><a href="#">[BioGrid]</a> | <input type="button" value="A"/> |
| 506    | ATPSB    | ATPM8<br>ATPSB<br>MGCS231                                                              | <a href="#">[Gene]</a><br><a href="#">[BioGrid]</a> | <input type="button" value="A"/> |

fi To manually add a protein to a background list, press [Add New].



You will then be prompted to enter a new contaminating/background protein. You can simply enter a gene name and species and press [Get Protein Info]. Press [Add] to include this protein on the background list.

|            |                      |                                                                                                                 |
|------------|----------------------|-----------------------------------------------------------------------------------------------------------------|
| GeneID:    | 58                   | <input type="button" value="Get Protein Info"/>                                                                 |
| LocusTag:  | RP5-106885.2         | <small>This field is ignored if a Gene ID is specified when you click [Get Protein Info]</small>                |
| Gene Name: | ACTA1                | <small>This field is ignored if a Gene ID or a Locus Tag is specified when you click [Get Protein Info]</small> |
| Species:   | Homo sapiens (human) | <input type="button" value="Add"/> <input type="button" value="Reset"/> <input type="button" value="Cancel"/>   |

| GeneID | GeneName ▲                    | Option                                                                       |
|--------|-------------------------------|------------------------------------------------------------------------------|
| [C]    | Set Name <input type="text"/> | <input type="button" value="Confirm"/> <input type="button" value="Cancel"/> |

You didn't select any Non-specific set. Do you want to create a new one?

If you do not specify a pre-entered non-specific set, ProHits will allow you to create a new one (press [Confirm] after entering the non-specific set name).

**fi To import a contaminant list from a different project, press [Import from other projects], and navigate through the menus.**

*Non-specific (background) import from other project*

|           |                                          |                          |                                       |
|-----------|------------------------------------------|--------------------------|---------------------------------------|
| Projects: | Demo Human Gel Free                      | Non-specific Set:        | FLAG_top_contaminant                  |
| Set Name: | <input type="radio"/> Add as new         | <input type="text"/>     |                                       |
|           | <input type="radio"/> Append to existing | -----Select a group----- |                                       |
|           |                                          |                          | <input type="button" value="Import"/> |

| GeneID | GeneName | Gene Alias                                                                             | Links                                               |
|--------|----------|----------------------------------------------------------------------------------------|-----------------------------------------------------|
| 58     | ACTA1    | ACTA<br>ASMA<br>CFTD<br>CFTD1<br>CFTDM<br>MPFD<br>NEM1<br>NEM2<br>NEM3<br>RP5-106885.2 | <a href="#">[Gene]</a><br><a href="#">[BioGrid]</a> |
| 345651 | ACTBL2   | ACT<br>DKFZp686D0972                                                                   | <a href="#">[Gene]</a><br><a href="#">[BioGrid]</a> |

You now have your own background set that can be used for filtering both in the bait/sample report pages and in comparison. **We recommend using caution when creating these sets: some proteins that are true interacting partners for a given bait may also be present (usually in lower amounts) on the background list. It may be a good idea to only include on this non-specific (background) list proteins detected across more than one control run with a high number of peptides.**

## Group Lists

ProHits allows the definition of new "groups" for any given project. As described earlier, groups are added to baits/samples by selecting the "Notes" Option. Groups act like flags and are displayed in the status bar in the "Report by Bait" or "Report by Sample" pages. These groups can help you organize your data.

### fi Select the "Groups" entry from the Manage Protocols and Lists.

As with the other Protocols and Lists, you can define new groups, or import a new group from another project. Here we will import sample groups from a different project.

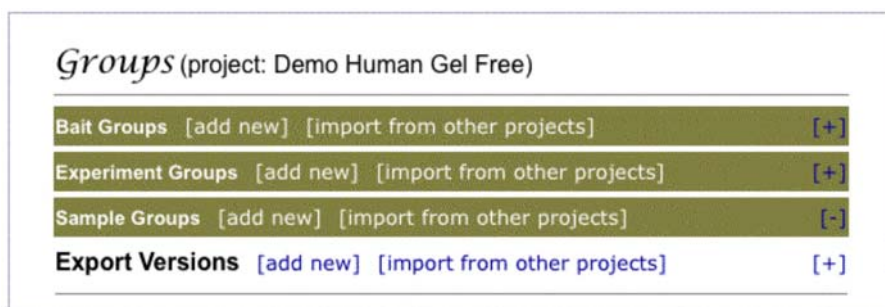

### fi To import groups from a different project, press [import from other projects], and navigate through the menus.

As with the Text-based protocols, use the green arrows to transfer desired groups to the current project. You can only transfer one group at a time.

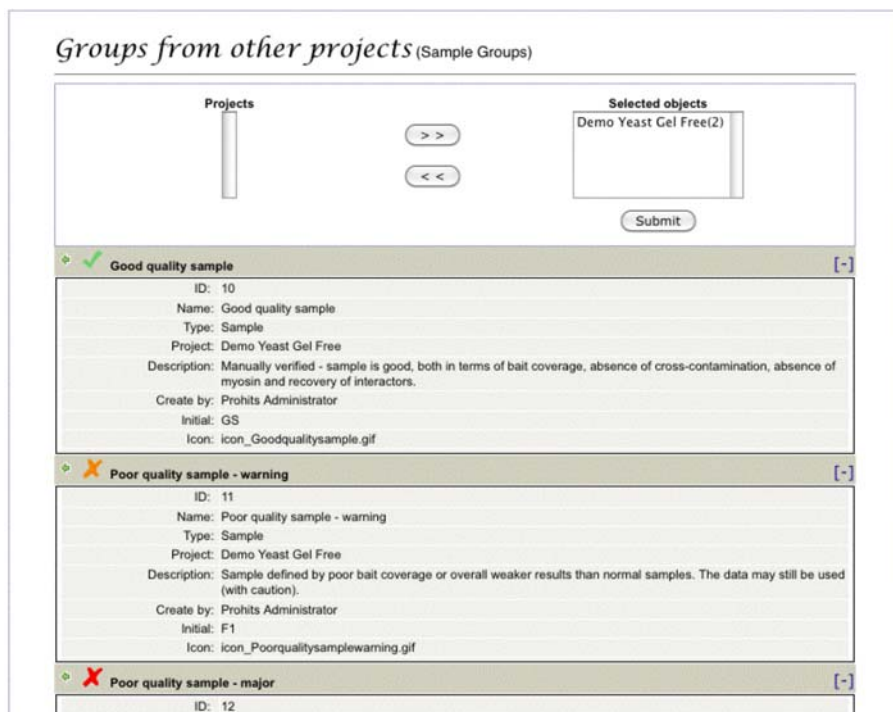

Upon transfer of a group, it will appear on your group list as shown below (the new group can be modified or deleted, unless it is used for a sample).

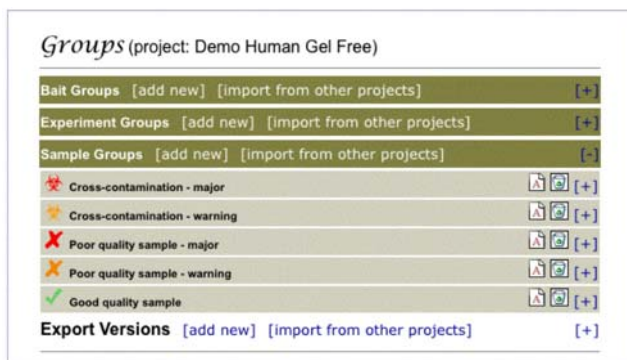

**fi To create a new group, press [add new], and navigate through the menus.**

Simply enter a short descriptive name for the group as well as a description, an abbreviation (that will be listed alongside the baits or samples), and an icon. Icons can easily be created in Photoshop as 17 x 17 pixel images, and saved as GIF, PNG or JPEG files. A template can be downloaded from the ProHits group page.

### Export version

ProHits allows you to flag a group of samples, e.g. for inclusion in a publication or export to a third party.

**fi To create an Export Version, press [add new].**

This will open a new menu with the default abbreviation (Version1, VS1), and Icon (a yellow star with the number 1). Subsequent versions will automatically be numbered VS2, VS3, etc., and the number inside the star will similarly increase. We suggest that you provide a meaningful short name and an accurate description of each "Export Version".

**Export Versions** [add new] [import from other projects] [+]



The screenshot shows a web form for creating an export version. It includes a text input for 'Name', a dropdown for 'Type' set to 'Export', a large text area for 'Description', a label for 'Abbreviation' showing 'VS1', and an 'Icon' field with a yellow star icon. At the bottom are three buttons: 'Save', 'Reset', and 'Close'.

## Epitope Tag Lists

### fi Select the "Epitope Tag Lists" entry from the Manage Protocols and Lists.

This lists all tags available to the local ProHits projects. Clicking on the [+] sign expands the details of the epitope tag. We have mapped the current epitope tags in the demo database to PSI MI 2.5, using the Ontology Lookup Service (OLS) at the EBI. A link page is provided that allow retrieval of additional information.

The screenshot shows the "Epitope Tags" interface. On the left, a list of tags is displayed: N-Flag, C-Flag, N-HA, C-HA, and N-TAP. The C-Flag tag is expanded, showing details: ID: 2, Name: C-Flag, OLSID: MI:0518, Location: MI:0334 c-terminal position, OLSTerm: flag tag, and Description. A blue arrow points from the "OLS Lookup" link in the OLSID field to the OLS service interface on the right.

The OLS - Ontology Lookup Service interface shows the search results for "Molecular Interaction (PSI MI 2.5) [MI]". The search results include:

| Enter Ontology Term                                                      |                                                                                                                                                                                          |
|--------------------------------------------------------------------------|------------------------------------------------------------------------------------------------------------------------------------------------------------------------------------------|
| Search Ontology:                                                         |                                                                                                                                                                                          |
| Molecular Interaction (PSI MI 2.5) [MI]                                  | Browse                                                                                                                                                                                   |
| Term Name: (Include obsolete terms <input checked="" type="checkbox"/> ) | Term ID: MI:0518                                                                                                                                                                         |
| flag tag                                                                 | <input type="radio"/>                                                                                                                                                                    |
| Additional Information:                                                  |                                                                                                                                                                                          |
| definition                                                               | The protein of interest is expressed as a fusion to the peptide DYKDDDDKV for which antibodies are commercially available. Sometimes multiple copies of the peptide are fused in tandem. |
| subset                                                                   | Subset of PSI-MI                                                                                                                                                                         |
| preferred name                                                           | flag tag                                                                                                                                                                                 |
| Alternate label curated by PSI-MI synonym                                | FLAG-tagged                                                                                                                                                                              |
| Alternate label curated by PSI-MI synonym                                | FLAG                                                                                                                                                                                     |
| Alternate label curated by PSI-MI synonym                                | DYKDDDDKV epitope tag                                                                                                                                                                    |
| xref_definition                                                          | PMID:3669                                                                                                                                                                                |

In addition to the epitope tags currently in the system, you can create additional tags by pressing [add new] and navigating through the fields. Again, we strongly recommend mapping your terms to PSI MI 2.5 whenever possible.

The "add new" form for creating an epitope tag includes the following fields:

- Name: [text input]
- OLSID: [text input] with an [OLS Lookup] link
- Location: [dropdown menu] with an [OLS Lookup] link
- OLSTerm: [text input]
- Description: [text area]

At the bottom of the form are three buttons: Save, Reset, and Close.

# ProHits Installation and Setup

The ProHits server requires a Linux system that runs PHP, Apache and MYSQL. We have developed this software on Fedora Core v9. Use of other versions of Linux may cause problems. Make sure you have full administrative access to the machine via Root access. Persons installing this package must have a good knowledge of both windows and Linux operating systems.

We make no claims that ProHits is stable or secured against hackers. We strongly suggest that ProHits be kept and used only behind a secured firewall. The following instructions apply to Fedora Core 9 (PHP5.2.5), Mascot 2.2 /2.3, TPP v4.3 and X!Tandem (2008.02.01).

## Part 1: Prepare ProHits Installation

### 1. Computer requirement

The full version of ProHits (with MS Data Management) requires four web servers for full operation. If you use the ProHits Lite version (which only handles uploaded search results), only the ProHits server is required. All web server ports should be 80. Use of other ports may cause problems.

- ProHits server (Linux).
  - This server needs a large hard drive for raw file storage (>400GB) and large memory (>3GB).
- Mascot (Windows or Linux)
  - The Mascot server should have a large storage folder to keep search results (> 400GB).
- TPP & X!Tandem (Windows)
  - TPP and X!Tandem should be installed on the same server; this server should have a large storage folder to keep search results (>400GB).
- RawConverter (Windows)
  - This server only requires fast CPU and large memory (>3GB).

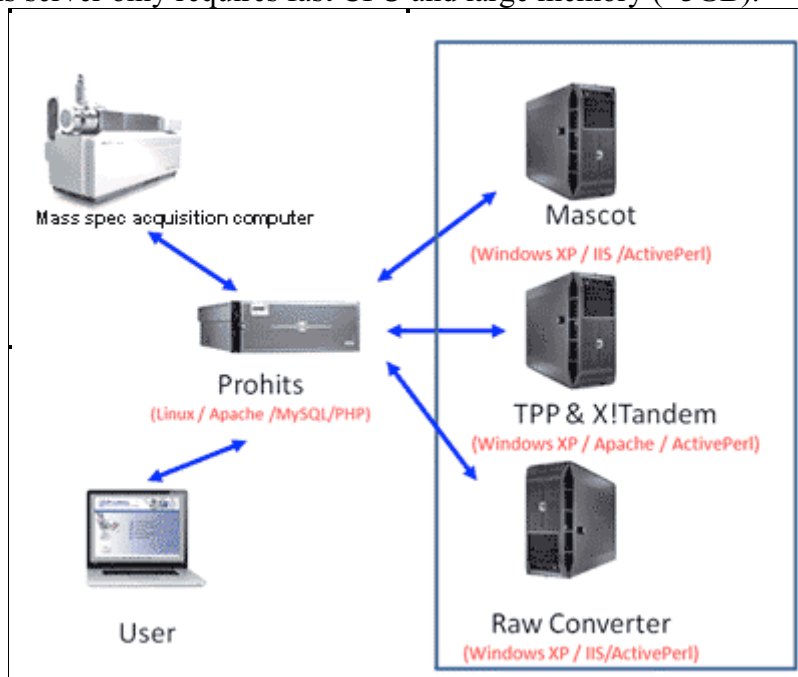

## 2. Setup the ProHits server

---

The ProHits server has been designed and tested only on an Intel-based Linux computer with particular emphasis on Fedora core v9. It requires the following packages that are available with all Linux distributions.

```
php
mysql
mysql-devel
mysql-server
php-mysql
httpd (Apache)
gd
php-gd
php-pear (after installing php-pear, use pear command to install
HTTP Request)
sendmail
java-x.x.x-openjdk
java-x.x.x-openjdk-devel
```

To test whether you have these packages installed, log in as root and use the following command to see if you have installed packages from rpm:

- `yum list installed <PACKAGE NAME>`

For example, `yum list installed gd`

If you don't know package full name you can use grep command

For example, `yum list installed | grep openjdk`

If the package is installed, it should appear on your list. If it is missing, or you think it might not be the most recent version, type in:

- `yum install <PACKAGE NAME>`
- After you've installed **php-pear**, then use the following command to install HTTP\_Request.
 

```
>pear list
>pear install Net_Socket
>pear install Net_URL
>pear install HTTP_Request
```

### A. Set Network configuration

- Set a fixed IP address and DNS address for the Prohits server
  - Typically by clicking on **System --> Administration --> Network**

### B. Make adjustments for the Trusted services in the iptables firewall

System > Administration > Security Level and Firewall > checkmark FTP, WWW(HTTP), DNS

- Click ‘Other Ports’ ‘Add’ port 3306 for Protocol ‘tcp’ (MYSQL)

**C. Edit the httpd.conf file (/etc/httpd/conf/httpd.conf).**

- Please set the web server to use **port 80**. Use of other ports may cause problems.
- Remove the option “Indexes” from document root directory setting (var/www/html), resulting in the following fragment:

```
<Directory "/var/www/html">
    Options FollowSymLinks ExecCGI Includes MultiViews
    AllowOverride None
    Order allow,deny
    Allow from all
</Directory>
```

- Find the line that starts with “DirectoryIndex”  
Add “**index.php**” and “**index.html**”
- Change the timeout if you need to process large raw files. 200 seconds is long enough to handle a 100 MB raw file. You may need to adjust this to your own needs.

```
Timeout 200
```

**D. Modify the PHP configuration file (/etc/php.ini) – the settings should be adjusted as follows:**

```
register_globals = Off
default_socket_timeout=360
memory_limit = 20M
//you may increase the memory limit for a large raw file
upload_max_filesize = 700M
post_max_size= 700M
//you may increase the value if you want the user to upload a large raw file or TPP results files.
session.auto_start = 0
session.use_cookies = 1
//make sure session directory is writable for apache user (the directory is defined in php.ini)
Session.save_path = "/var/lib/php/session"
session.use_only_cookies = 0
display_errors = On
```

**E. Ensure your php session directory has write permissions for the Apache user**

```
>ll /var/lib/php
>cd /var/lib/php
>chgrp apache session
>chmod g+wx session
```

**F. Restart computer services.**

In the services configuration, make sure these services “Enabled” and “Running” services: Go to:

**System > Administration > Server Settings > Services >**

```
network
mysqld
sendmail
httpd
```



### 3. Setup the Mascot server (skip this step for Lite version)

---

A. ProHits supports Mascot 2.2/2.3 running on Linux or Windows web servers.

B. Copy '**ProhitsMascotParser.pl**' from Prohits/install/Mascot/ to the Mascot /cgi/ folder  
Please make sure the first line of the file has the correct path to perl.exe in the Mascot server

e.g.

Mascot in Windows server

```
#!c:/perl/bin/perl.exe
```

Mascot in Linux server

```
#!/usr/local/bin/perl
```

### 4. Setup the TPP & X!Tandem server (skip this step for Lite version)

---

A. ProHits works with X!Tandem and TPP in both Windows and Linux servers. However, note that X!Tandem and TPP should be on the same server. We suggest using a Windows server for easy installation..

Install ActivePerl and Apache using default installation.

**Apache:** (IIS web server may not be supported)

<http://httpd.apache.org/download.cgi>

select Win32 Binary without crypto (no mod\_ssl) (MSI Installer)

**ActivePerl:** (Be sure to install 5.8)

<http://www.activestate.com/activeperl/downloads/>

select ActivePerl 5.8.9.827 Windows Installer(MSI)

B. Please follow the instruction in

[Prohits/install/GPM/install\\_TPP\\_GPM.html](#) to setup TPP and X!Tandem.

### 5. Set up Raw file converter server (skip this step for Lite version) (must be a windows computer)

---

A. ProHits needs a Microsoft Windows computer running the IIS web server and ActivePerl to convert raw files to mgf and mzXML files.

B. Please follow the instructions in:

[Prohits/install/RawConverter/install\\_rawConverter.html](#) to setup RawConverter.

## Part 2: Install ProHits

---

### 1. Place ProHits source code on ProHits server Apache document root directory

---

A. Unzip downloaded ProHits source in the Apache document root directory (/var/www/html).

Unzip ProHits source code:

```
> tar xvfz Prohits_v1.x_x.tar.gz
```

B. Change permission:

(find out Apache User from httpd.conf. The User should be apache or www-data)

```
>chown -R apache:apache Prohits
```

```
>chmod -R 755 Prohits
```

### 2. Run installation wizard.

---

Before running the installation wizard, make sure that SELinux http, ftp and cifs have been opened. You can turn off SELinux (**SELINUX=disabled** in **/etc/selinux/config**), if the ProHits server is firewall protected. For more information please read:

[http://docs.fedoraproject.org/en-US/Fedora/13/html/Security-Enhanced\\_Linux/](http://docs.fedoraproject.org/en-US/Fedora/13/html/Security-Enhanced_Linux/)

```
> /usr/sbin/getenforce
```

A. Open installation wizard page from your browser.

```
http://prohits_server_address/Prohits/install/install.php
```

B. Run installation check list after finish the wizard.

```
http://prohits_server_address/Prohits/admin_office/check.php
```
